# Supplementary material
Source: publisher figshare collection journal article supplement (https://gsajournals.figshare.com/ndownloader/files/21739497)
Supplement: Supplementary file 1 [file 21739497]

## Sheet: LinkageMap_Genotyping
Population genotyping following the linkage map order colored based on the alleles of the parents. Genetic and physical position included based on the tetraploid peanut sequence (Bertioli et al. 2019).
LG	Marker	Alias	GenBank Accession	Genetic distance (cM)	Pseudomolecule	Physical position (bp)		Tif F6:8_593	PR F6:7_594	PR F6:7_595	PR F6:7_596	PR F6:7_597	PR F6:7_598	PR F6:7_600	PR F6:7_601	PR F6:7_602	Tif F6:8_603	Tif F6:7_604	PR F6:7_605	PR F6:7_606	PR F6:7_607	PR F6:7_608	PR F6:7_610	PR F6:7_611	PR F6:7_612	PR F6:7_613	Tif F6:7_614	Tif F6:7_615	PR F6:7_616	Tif F6:7_619	PR F6:7_620	PR F6:7_621	PR F6:7_622	PR F6:7_623	PR F6:7_624	Tif F6:7_625	Tif F6:7_626	Tif F6:7_627	PR F6:7_628	PR F6:7_629	Tif F6:7_630	Tif F6:7_631	PR F6:7_632	PR F6:7_633	PR_F6:7_634	Tif F6:7_635	PR F6:7_636	PR F6:7_637	PR F6:7_638
A01	AX-147208643	AX-147208643_A01		0	Arahy.01	5267151		N	N	N	N	T	N	N	T	T	N	T	N	T	T	T	T	T	N	T	T	T	N	T	N	N	N	T	T	N	T	N	T	T	N	N	T	T	T	T	N	N	N
A01	AX-147237759	AX-147237759_B01		6.334	Arahy.01	5716478		T	N	N	N	N	N	-	H	T	N	T	N	T	T	T	T	T	N	T	N	T	N	T	N	N	N	N	T	N	T	N	T	T	N	N	T	N	N	T	N	T	T
A01	AX-147237742	AX-147237742_B01		7.034	Arahy.01	5860834		T	N	N	N	N	N	T	N	T	N	T	N	T	T	T	T	T	N	T	N	T	N	T	N	N	N	N	T	N	T	-	T	T	N	N	T	N	N	T	N	T	T
A01	AX-147237733	AX-147237733_A01		7.701	Arahy.01	5951486		T	N	N	N	N	N	H	H	T	N	T	N	T	T	T	T	T	N	T	N	T	N	T	N	N	N	N	T	N	T	N	T	T	N	N	T	N	N	T	N	T	T
A01	AX-147208793	AX-147208793_A01		8.199	Arahy.01	5929979		T	N	N	N	N	N	N	T	T	N	T	N	T	T	T	T	T	N	T	N	T	N	T	N	N	N	N	T	N	T	N	T	T	N	N	T	N	N	T	N	T	T
A01	AX-147237720	AX-147237720_A01		8.529	Arahy.01	6183977		T	N	N	N	N	N	N	T	T	N	T	N	T	T	T	T	T	N	T	N	T	N	T	N	N	N	N	T	N	T	N	T	T	N	N	T	N	N	T	N	T	T
A01	AX-147210419	AX-147210419_A01		25.1	Arahy.01	22266684		T	N	N	T	N	N	N	N	T	T	T	T	T	T	N	T	N	N	T	T	T	N	T	N	N	N	N	N	N	N	N	T	T	N	N	T	T	N	T	N	N	T
A01	AX-147210651	AX-147210651_A01		26.607	Arahy.01	31855308		T	N	N	T	N	N	N	N	T	T	T	T	T	T	N	T	N	-	T	T	T	N	T	N	N	N	N	N	N	-	T	T	T	N	-	T	T	N	T	N	-	T
A01	AX-147243678	AX-147243678_A01		28.391	Arahy.01	32139753		T	N	N	T	N	N	N	N	T	T	T	T	T	T	N	T	N	N	T	T	T	N	T	N	N	N	N	N	N	N	T	T	T	N	N	T	T	N	T	N	N	T
A01	AX-147238200	AX-147238200_A01		28.616	Arahy.01	32501966		T	N	N	T	N	N	N	N	T	T	T	T	T	T	N	T	N	N	T	T	T	N	T	N	N	N	N	N	N	N	T	T	T	N	N	T	T	N	T	N	N	T
A01	AX-147210650	AX-147210650_A01		29.02	Arahy.01	31828705		T	N	N	T	N	N	N	N	T	T	T	T	T	T	N	T	N	N	T	T	T	N	T	N	N	N	N	N	N	N	T	T	T	N	N	T	T	N	T	N	N	T
A01	AX-147238337	AX-147238337_A01		29.428	Arahy.01	27613793		T	N	N	T	N	N	N	N	T	T	T	T	T	T	N	T	N	N	T	T	T	N	T	N	N	N	N	N	N	N	T	T	T	H	N	T	T	N	T	N	N	T
A01	AX-147210522	AX-147210522_A01		30.219	Arahy.01	26867685		T	N	N	T	N	N	N	N	T	T	T	T	T	T	N	T	N	N	T	T	T	N	T	N	N	N	N	N	N	N	T	T	T	N	N	T	T	N	T	N	N	T
A01	AX-147238237	AX-147238237_A01		31.289	Arahy.01	18659665		T	N	N	T	N	N	N	N	T	T	T	T	T	T	N	T	N	N	T	T	T	N	T	N	N	N	N	N	N	N	T	T	T	N	N	T	T	N	T	N	N	T
A01	AX-147238318	AX-147238318_A01		32.34	Arahy.01	24650513		T	N	N	T	N	N	N	N	T	T	T	T	T	T	N	T	N	N	T	T	T	N	T	N	N	N	N	N	N	N	T	T	T	N	N	T	T	N	T	N	N	T
A01	AX-147238226	AX-147238226_B01		32.977	Arahy.01	17443040		H	N	N	T	N	N	N	N	T	T	T	T	T	T	N	T	N	N	T	T	T	N	T	N	N	N	N	N	N	N	T	T	T	N	N	T	T	N	T	N	N	T
A01	AX-147209615	AX-147209615_B01		35.44	Arahy.01	11472713		H	N	N	T	N	N	N	N	T	T	T	T	T	T	N	T	N	N	T	T	T	N	T	N	N	N	N	N	N	N	T	T	T	N	N	T	H	N	T	N	N	T
A01	AX-147237538	AX-147237538_B01		36.981	Arahy.01	11438734		N	N	N	T	N	N	N	N	T	T	T	T	T	T	N	T	N	N	T	T	T	N	T	N	N	N	N	N	N	N	T	T	T	N	N	T	N	N	T	N	N	T
A01	AX-147209601	AX-147209601_A01		38.007				N	N	N	T	N	N	N	N	T	T	T	T	T	T	N	T	N	N	T	T	T	N	T	N	N	N	N	N	N	N	T	H	T	N	N	T	-	N	T	N	N	T
A01	AX-147209600	AX-147209600_A01		39.438				H	N	N	T	N	N	N	N	T	T	T	T	T	T	N	T	N	N	T	T	T	N	T	N	N	N	N	N	N	N	T	H	T	N	-	T	H	N	T	N	N	T
A01	AX-147262819	AX-147262819_A01		42.408				N	N	N	T	N	N	N	N	T	T	T	T	T	T	N	T	N	N	T	T	T	N	H	N	N	N	N	N	N	N	T	T	T	N	N	T	T	N	H	N	N	T
A01	AX-147209428	AX-147209428_A01		43.948	Arahy.01	12336450		N	N	N	T	N	N	N	N	T	T	T	T	T	T	N	T	N	N	T	T	T	N	T	N	N	N	N	N	N	N	T	T	T	N	N	T	T	N	T	N	N	T
A01	AX-147209429	AX-147209429_A01		44.278				H	N	N	T	N	N	N	N	T	T	T	T	T	T	N	T	N	N	T	T	T	N	T	N	N	N	N	N	N	N	T	T	T	N	N	T	T	N	T	N	N	T
A01	AX-147209430	AX-147209430_A01		45.38				-	N	N	T	N	N	N	N	T	T	T	T	T	T	N	T	N	N	T	T	T	N	T	N	N	N	N	N	N	N	T	T	T	N	N	T	T	N	T	N	N	T
A01	AX-147209504	AX-147209504_A01		46.488	Arahy.01	12040486		T	N	N	T	N	N	N	N	T	T	T	T	T	T	N	T	N	N	T	T	T	N	T	N	N	N	N	N	N	N	T	T	T	N	N	T	T	N	T	N	N	T
A01	AX-147209432	AX-147209432_A01		46.82	Arahy.01	12293543		T	N	N	T	N	N	N	N	T	T	T	T	T	T	N	T	N	N	T	T	T	N	T	N	N	N	N	N	N	N	T	T	T	N	N	T	T	N	T	N	N	T
A01	AX-147211264	AX-147211264_A01		48.181				T	N	N	T	N	N	N	N	T	T	T	T	T	T	N	T	N	N	T	T	T	N	T	N	N	N	N	N	N	N	T	T	T	N	N	T	T	N	T	N	N	T
A01	AX-147238476	AX-147238476_A01		48.848	Arahy.01	40137471		T	N	N	T	N	N	N	N	T	T	T	T	T	T	N	T	N	N	T	T	T	N	T	N	N	N	N	N	N	N	T	T	T	N	N	T	T	N	T	N	N	T
A01	AX-147243583	AX-147243583_A01		49.601	Arahy.01	73635872		T	N	N	T	N	N	N	N	T	T	T	T	T	T	N	T	N	N	T	T	T	N	T	N	N	N	N	N	N	N	T	T	T	N	N	T	T	N	T	N	N	T
A01	AX-147211366	AX-147211366_A01		50.799	Arahy.01	58189417		-	N	N	T	N	N	N	N	T	T	T	T	T	T	N	T	N	N	T	T	T	N	T	N	N	N	N	N	N	N	T	T	T	N	N	T	T	N	T	N	N	T
A01	AX-147259600	AX-147259600_B09		51.827	Arahy.01	95505701		T	N	N	T	N	N	N	N	T	T	T	T	T	T	N	T	N	N	T	T	T	N	T	N	N	N	N	N	N	N	T	T	T	N	-	T	T	N	T	N	N	T
A01	AX-147211668	AX-147211668_A01		51.956	Arahy.01	94943779		T	N	-	T	N	N	N	N	T	T	T	T	T	T	N	T	N	N	T	T	T	N	T	N	N	N	N	N	N	N	T	T	T	N	N	T	T	N	T	N	N	T
A01	GM1992	GM1992_a01	GO260884.1	53.018	Arahy.01	93368585		-	N	N	T	N	N	N	N	T	T	T	T	-	T	N	T	N	-	T	T	T	N	T	N	-	N	N	N	N	N	T	T	T	N	N	T	T	N	T	-	-	T
A01	GM22	Ah1TC2D06	DQ099207	55.388	Arahy.01	48531313		T	N	N	T	N	N	N	N	T	T	T	T	T	T	N	T	N	N	T	T	T	N	T	N	N	N	N	N	N	N	T	T	T	N	H	T	T	-	T	N	N	T
A01	AX-147238535	AX-147238535_B01		58.064	Arahy.01	49173138		T	N	N	T	-	N	N	N	T	T	T	T	T	T	N	T	N	N	T	T	T	N	T	N	N	N	N	N	N	N	T	T	T	N	N	T	T	N	T	N	N	T
A01	AX-147211613	AX-147211613_A01		59.226	Arahy.01	71524083		T	N	N	T	N	N	N	N	T	T	T	T	T	T	N	T	N	N	T	T	T	N	T	N	N	N	N	N	N	N	T	T	T	N	-	T	T	N	T	N	N	T
A01	AX-147239715	AX-147239715_B01		60.566	Arahy.01	94791594		T	N	N	T	N	N	N	N	T	T	T	T	T	T	N	T	N	N	T	T	T	N	T	N	N	N	N	N	N	N	T	H	T	N	N	T	T	N	T	N	N	T
A01	AX-147211672	AX-147211672_A01		60.965	Arahy.01	95227378		T	N	N	T	N	N	N	N	T	T	T	T	T	T	N	T	N	N	T	T	T	N	T	N	N	N	N	N	N	N	T	T	T	N	N	T	T	N	T	N	N	T
A01	AX-147211215	AX-147211215_A01		61.16	Arahy.01	53323028		T	N	N	T	N	N	N	N	T	T	T	T	T	T	N	T	N	N	T	T	T	N	T	N	N	N	N	N	N	N	T	T	T	N	N	T	T	N	T	N	N	T
A01	AX-147211641	AX-147211641_A01		61.308	Arahy.01	93764425		T	N	N	T	N	N	N	N	T	T	T	T	T	T	N	T	N	N	T	T	T	N	T	N	N	N	N	N	N	N	T	T	T	N	N	T	T	N	T	N	N	T
A01	GM60	Ah1TC4H02		61.472	Arahy.01	9.03868e+07		T	N	N	T	N	N	N	N	T	T	T	T	T	T	N	T	N	N	T	T	T	N	T	N	N	N	N	N	N	N	T	T	T	N	N	T	T	N	-	N	N	T
A01	AX-147238455	AX-147238455_A01		61.637	Arahy.01	39391871		T	N	N	T	N	N	-	N	T	T	T	T	T	T	N	T	N	N	T	T	T	N	T	N	N	N	N	N	N	N	T	T	T	N	N	T	T	N	T	N	N	T
A01	AX-147210961	AX-147210961_A01		61.709	Arahy.01	39832847		T	N	N	T	N	N	N	N	T	T	T	T	T	T	N	T	N	N	T	T	T	N	T	N	N	N	N	N	N	N	T	T	T	N	N	T	T	N	T	N	N	T
A01	AX-147246379	AX-147246379_B04		61.801	Arahy.01	93919136		T	N	N	T	N	N	N	N	T	T	T	T	T	T	N	T	N	N	T	T	T	N	T	N	N	N	N	N	N	N	T	T	T	N	N	T	T	N	T	N	N	T
A01	AX-147211605	AX-147211605_A01		61.965	Arahy.01	77799720		T	N	N	T	N	N	N	N	T	T	T	T	T	T	N	T	N	N	T	T	T	N	T	N	N	N	N	N	N	N	T	T	T	N	N	T	T	N	T	N	N	T
A01	AX-147239610	AX-147239610_A01		65.559	Arahy.01	96367280		T	N	N	T	N	N	N	N	T	T	T	T	T	T	N	T	N	N	T	T	T	N	T	N	N	N	N	N	N	N	T	T	T	N	N	T	T	N	T	N	N	T
A01	AX-147211707	AX-147211707_A01		66.859	Arahy.01	96922413		T	N	N	T	N	N	N	N	T	T	T	T	T	T	N	T	N	N	T	T	T	N	T	N	N	N	N	N	N	N	T	T	T	N	N	T	T	N	T	N	N	T
A01	GM1501a	GM1501a_b01	EZ723628	75.936				T	N	N	T	T	N	N	N	N	T	T	N	T	T	N	T	-	N	T	T	T	N	T	N	-	N	N	N	N	N	T	T	T	N	N	T	T	-	T	N	-	H
A01	AX-147239258	AX-147239258_B01		79.75	Arahy.01	102111564		T	N	N	T	T	N	N	N	N	T	N	N	T	T	N	T	N	N	T	T	T	N	T	N	N	N	N	N	N	N	T	T	T	N	N	T	T	N	T	N	N	-
A01	AX-147239210	AX-147239210_A01		83.196	Arahy.01	102519998		T	N	N	T	T	N	N	N	N	T	N	N	T	T	N	T	N	N	T	T	T	N	T	N	N	N	N	N	N	N	T	T	T	N	N	T	T	N	T	N	N	H
A01	AX-147239100	AX-147239100_A01		87.453	Arahy.01	103879597		T	N	N	T	T	N	N	N	N	T	N	N	T	T	N	H	T	N	T	T	T	N	T	N	N	N	N	N	N	N	T	T	T	N	N	T	T	N	T	N	N	H
A01	AX-147238994	AX-147238994_B01		90.298	Arahy.01	105466547		T	N	N	T	T	N	N	N	N	T	N	N	T	N	N	T	T	N	T	T	T	N	T	N	N	N	N	N	N	N	T	T	T	N	T	T	T	N	T	H	N	N
A01	AX-147211928	AX-147211928_A01		90.462	Arahy.01	105377665		T	N	N	T	T	N	N	N	N	T	N	N	T	N	N	T	T	N	T	T	T	N	T	N	N	N	N	N	N	N	T	T	T	N	T	T	T	N	T	H	N	N
A01	AX-147211945	AX-147211945_A01		95.861	Arahy.01	105792580		T	N	N	T	T	N	N	N	T	N	T	T	T	N	N	N	T	N	T	T	T	N	T	N	N	N	N	N	N	T	T	T	T	N	T	T	T	N	T	H	N	N
A01	GM529	pPGSseq14A7		98.351				-	N	N	T	T	N	N	N	T	N	T	T	T	N	N	N	T	-	T	T	T	N	T	N	-	N	N	N	N	T	T	T	T	N	T	T	T	N	T	T	N	N
A01	GM38	Ah1TC3H02	DQ099184	106.992	Arahy.01	1.07306e+08		T	N	N	-	T	N	N	N	T	N	T	H	-	N	N	N	T	N	-	T	T	N	T	N	-	N	N	N	N	T	T	T	T	N	T	T	T	N	T	T	N	T
A01	AX-147244538	AX-147244538_B03		110.419	Arahy.01	108189906		T	N	N	T	N	T	N	N	T	N	T	H	T	N	N	-	T	N	T	T	T	N	T	N	N	N	N	N	N	T	T	T	T	T	T	T	T	T	T	T	N	T
A01	GM496b	pPGPseq8E12		116.723				-	N	N	T	N	T	N	N	H	N	N	H	T	N	N	N	H	-	H	N	N	N	T	N	-	N	N	N	N	T	T	T	T	T	T	T	T	T	T	T	N	T
A01	AX-147212043	AX-147212043_A01		119.117	Arahy.01	109290793		T	N	N	T	N	T	N	N	T	N	N	H	T	N	N	H	T	N	T	N	N	N	T	N	N	N	N	N	N	T	T	T	N	T	T	T	T	T	T	T	N	T
A01	AX-147212046	AX-147212046_A01		122.006	Arahy.01	109539280		T	T	N	T	N	T	N	N	T	N	N	H	T	N	N	H	T	N	T	N	N	N	T	N	N	N	N	N	N	T	T	T	T	T	T	T	T	T	T	T	N	T
A01	AX-147238877	AX-147238877_B01		122.416	Arahy.01	109533612		T	T	N	T	N	T	N	N	T	N	N	H	T	N	N	H	T	N	T	N	N	N	T	N	N	N	N	N	N	T	T	T	T	T	T	T	T	T	T	T	N	T
A01	AX-147238875	AX-147238875_B01		123.161	Arahy.01	109538863		T	T	N	T	N	T	N	N	T	N	N	H	T	N	N	H	-	N	T	N	N	N	T	N	N	N	N	N	N	T	T	T	T	T	T	T	T	T	T	T	N	T
A01	AX-147238845	AX-147238845_A01		126.146				T	T	N	T	N	T	N	N	T	N	N	N	T	N	N	N	N	N	T	N	N	-	T	N	N	N	N	N	N	T	T	T	T	T	T	T	T	T	T	T	N	T
A01	GM1845	GM1845	EZ722341	132.449	Arahy.01	1.11478e+08		-	T	N	N	N	T	N	N	T	N	N	N	T	N	N	T	N	-	T	N	N	N	T	N	-	N	N	N	N	T	T	T	T	T	T	T	H	T	T	T	N	N
A02	AX-147214913	AX-147214913_A02		0	Arahy.02	95786732		N	N	T	T	H	T	N	N	N	T	N	N	N	T	T	T	N	N	T	N	N	N	N	H	N	-	N	T	N	T	T	N	N	N	T	N	H	T	N	N	N	N
A02	AX-147242374	AX-147242374_B02		4.362	Arahy.02	96133948		N	N	T	T	N	T	N	N	N	T	N	N	N	T	T	T	N	N	T	N	N	N	T	N	N	N	N	N	N	T	T	N	N	N	T	N	H	T	N	N	-	N
A02	AX-147242412	AX-147242412_A02		8.636	Arahy.02	96457329		N	N	T	T	N	T	N	N	N	T	N	N	N	T	T	H	T	N	N	N	N	N	T	N	N	N	N	N	N	T	T	N	N	N	T	N	H	T	N	N	H	N
A02	AX-147215003	AX-147215003_A02		12.43	Arahy.02	97342670		N	N	T	T	N	T	N	N	N	T	N	N	N	T	T	H	T	T	N	N	N	N	T	N	N	N	N	N	N	T	T	N	N	N	T	N	H	T	N	N	-	N
A02	AX-147242493	AX-147242493_B02		14.561	Arahy.02	97426134		-	N	T	T	N	T	-	N	N	-	N	N	-	T	T	-	T	T	N	N	N	N	T	N	N	N	N	N	-	T	T	N	H	N	T	N	H	T	N	N	-	-
A02	AX-147215018	AX-147215018_A02		17.126	Arahy.02	97604010		N	N	T	T	N	T	N	N	N	T	N	N	N	T	T	H	T	T	N	N	N	N	T	N	T	N	N	N	T	T	T	N	N	N	T	N	H	T	N	N	N	N
A02	AX-147242501	AX-147242501_B02		18.752	Arahy.02	97623172		N	N	T	T	N	T	N	N	N	T	N	N	N	T	T	-	T	T	N	N	N	N	T	N	T	N	N	N	T	T	T	N	N	N	T	N	N	T	N	N	N	N
A02	GM9a	Ah1TC1E01		22.357				N	N	N	T	N	T	N	N	N	T	N	N	N	T	T	H	T	T	N	N	N	N	T	N	-	N	N	N	T	T	T	N	N	N	T	N	H	T	-	N	H	N
A02	AX-147242533	AX-147242533_A02		25.397	Arahy.02	98069829		N	N	N	T	N	T	N	N	N	T	N	N	N	T	T	H	T	T	N	N	N	N	T	N	N	N	N	N	T	T	T	N	N	N	T	N	H	T	N	N	-	N
A02	AX-147242543	AX-147242543_A02		30.187				N	N	N	T	N	T	T	T	N	-	N	N	N	T	T	T	T	T	N	N	N	N	N	N	N	N	N	N	T	T	T	N	N	N	N	N	N	T	N	N	N	N
A02	AX-147215063	AX-147215063_A02		32.997	Arahy.02	98488957		N	N	N	T	N	T	T	T	N	N	N	N	N	T	T	H	T	T	N	N	N	N	T	N	N	N	N	N	T	T	T	N	N	N	N	N	H	T	N	N	N	N
A02	AX-147242544	AX-147242544_B02		34.446				N	N	N	T	N	T	T	T	N	H	N	H	N	T	T	H	T	T	N	N	N	N	T	N	N	N	N	N	T	T	T	N	N	N	N	N	H	T	N	N	N	N
A02	AX-147242545	AX-147242545_A08		36.216				N	N	N	T	N	T	T	T	N	T	N	-	N	T	T	H	H	T	N	N	N	N	T	N	N	N	N	N	T	T	H	N	N	N	N	N	H	T	N	N	N	N
A02	AX-147242584	AX-147242584_B02		39.141				N	N	N	T	N	T	T	T	N	N	N	T	N	T	T	T	T	T	N	N	N	N	T	N	N	N	N	N	T	T	N	N	N	N	N	N	T	T	N	N	N	N
A02	AX-147215091	AX-147215091_A02		41.408	Arahy.02	98940172		N	N	N	T	N	T	T	T	N	N	N	H	N	T	T	H	T	T	N	N	N	N	T	N	N	N	N	N	T	T	N	N	N	N	N	N	H	T	N	N	N	N
A02	AX-147242632	AX-147242632_A02		45.569	Arahy.02	99266203		N	N	N	-	N	T	T	T	N	N	N	-	N	T	T	-	-	T	N	N	N	N	T	N	N	N	N	N	T	-	N	N	N	N	N	N	N	T	N	N	N	N
A02	AX-147242625	AX-147242625_A02		48.765	Arahy.02	99251938		N	N	N	T	N	T	T	T	N	N	N	-	-	T	T	-	T	T	N	N	N	N	T	N	N	N	N	N	T	T	N	N	N	N	N	N	N	T	N	N	N	N
A02	AX-147242645	AX-147242645_A02		52.638	Arahy.02	99246424		N	N	N	T	N	T	T	T	N	N	N	-	N	N	T	T	T	T	N	N	N	N	T	N	N	N	N	N	T	T	-	N	N	N	N	N	T	T	-	-	T	N
A02	AX-147242626	AX-147242626_A02		55.769	Arahy.02	99252898		N	N	N	T	N	T	T	T	N	N	N	N	N	T	T	T	T	T	N	N	-	N	T	N	N	N	N	N	T	T	N	-	N	N	N	N	-	T	N	N	N	N
A02	AX-147242624	AX-147242624_A02		55.769	Arahy.02	99250489		N	N	N	T	-	T	T	T	N	N	N	N	N	T	T	T	T	T	N	N	N	N	T	N	N	N	N	N	T	T	N	N	N	N	N	N	T	T	N	N	N	N
A02	AX-147215151	AX-147215151_A02		59.962	Arahy.02	99876660		N	N	N	T	N	T	T	T	N	N	N	H	N	T	T	T	N	T	N	N	N	N	T	N	N	N	N	N	T	T	N	H	N	N	N	N	H	T	N	N	N	N
A02	AX-147242677	AX-147242677_A02		60.844	Arahy.02	99706672		N	N	N	T	N	T	T	T	N	N	N	H	N	T	T	T	N	T	N	N	N	N	T	N	N	N	N	N	T	T	N	T	N	N	N	N	H	T	N	N	H	N
A02	AX-147215143	AX-147215143_A02		62.403	Arahy.02	99704579		N	N	N	T	N	T	T	T	N	N	N	T	N	T	T	T	N	T	N	N	N	N	T	N	H	N	N	N	T	T	N	-	N	N	N	N	H	T	-	N	H	N
A03_1	AX-147245496	AX-147245496_B03		0				N	T	N	T	T	N	T	T	N	H	N	T	T	T	N	H	N	T	T	T	N	T	T	N	T	T	N	N	T	T	N	T	T	N	T	N	N	N	N	T	T	N
A03_1	AX-147218105	AX-147218105_A03		17.718	Arahy.03	135987233		T	T	T	T	N	T	T	T	N	T	N	T	T	T	N	T	N	N	N	T	N	T	T	N	T	T	N	T	T	T	N	T	T	N	T	N	N	N	N	T	T	N
A03_1	AX-147218116	AX-147218116_A03		20.032	Arahy.03	136058205		T	T	T	T	H	T	T	T	N	T	T	T	T	T	N	N	N	N	N	T	N	T	T	N	T	T	N	T	T	T	N	T	T	N	T	N	N	N	N	T	T	N
A03_1	AX-147218133	AX-147218133_A03		21.998	Arahy.03	136234652		T	T	T	T	N	T	T	T	N	T	H	T	T	T	N	N	N	N	N	T	N	T	T	N	T	T	N	T	T	T	N	T	T	N	T	N	N	N	N	T	T	N
A03_1	AX-147218140	AX-147218140_B03		25.695				-	T	T	N	N	-	N	T	N	T	N	T	N	T	N	N	N	N	N	T	N	T	T	N	T	T	N	T	-	T	N	T	T	N	N	N	N	N	N	T	T	-
A03_1	AX-147245791	AX-147245791_A03		28.954	Arahy.03	136380658		T	T	T	N	N	T	T	T	N	T	T	T	T	T	N	N	N	N	-	T	N	T	T	N	-	T	N	T	T	T	N	T	T	N	T	N	N	N	N	T	T	N
A03_1	GM1954	GM1954_a03-b03	EZ750631	39.623				N	T	T	N	N	T	T	T	N	T	T	T	-	T	N	T	N	-	-	T	T	T	T	N	-	T	T	T	T	T	N	T	T	T	T	T	N	T	N	T	T	N
A03_1	AX-147218260	AX-147218260_A03		42.813	Arahy.03	137729193		-	T	T	N	-	T	T	T	N	N	N	T	T	T	N	T	N	N	N	T	T	T	T	N	T	T	N	T	T	T	N	T	T	T	T	T	N	N	N	T	T	N
A03_1	AX-147218261	AX-147218261_A03		44.116	Arahy.03	137733809		N	T	T	N	N	T	T	T	N	N	H	T	T	T	N	T	N	N	N	T	T	T	T	N	T	T	N	T	T	T	N	T	T	T	T	H	N	N	N	T	T	N
A03_1	AX-147245920	AX-147245920_A03		45.662	Arahy.03	137875226		N	T	T	N	N	T	T	T	N	N	H	T	T	T	N	N	N	N	N	-	T	T	T	N	T	T	N	T	T	T	N	T	T	T	T	H	N	N	N	T	H	N
A03_1	AX-147245921	AX-147245921_A03		46.332	Arahy.03	137877230		N	T	T	N	N	T	-	T	N	N	H	T	-	T	N	N	N	N	N	T	T	T	T	N	T	T	N	T	T	H	N	T	T	T	H	H	N	N	N	T	T	N
A03_1	AX-147218273	AX-147218273_A03		47.173	Arahy.03	137877095		N	T	T	N	N	T	T	T	N	N	T	T	T	T	N	N	N	N	N	T	T	T	T	N	T	T	N	T	T	T	N	T	T	T	T	T	N	N	N	T	T	N
A03_1	AX-147245965	AX-147245965_A03		49.259	Arahy.03	138372113		N	T	T	N	N	T	T	T	N	N	T	T	T	T	N	N	N	N	N	T	T	T	T	N	T	T	N	T	T	T	N	T	T	T	N	T	N	N	N	T	-	N
A03_1	AX-147245956	AX-147245956_A03		50.141	Arahy.03	138254687		N	T	T	N	N	T	T	T	N	N	H	T	T	T	N	N	N	N	N	T	T	T	T	N	-	T	N	T	T	T	N	H	T	T	N	T	N	N	N	T	T	N
A03_1	AX-147218311	AX-147218311_A03		52.187	Arahy.03	138421395		N	T	T	N	N	T	T	T	T	N	H	T	T	T	N	N	N	N	N	T	T	T	T	N	T	T	N	T	T	T	N	T	T	N	H	T	N	N	N	T	H	N
A03_1	AX-147246037	AX-147246037_A03		56.389	Arahy.03	139130388		N	T	T	N	N	T	T	T	T	N	T	T	T	T	N	N	N	N	N	T	T	T	T	N	T	T	N	T	T	T	N	T	T	N	H	T	N	N	N	T	N	N
A03_1	AX-147218381	AX-147218381_A03		57.449	Arahy.03	139271001		N	T	T	N	N	T	T	T	T	N	T	T	T	T	N	T	N	N	N	T	T	T	T	N	T	T	N	T	T	T	N	T	T	N	H	T	N	N	N	T	N	N
A03_1	AX-147246094	AX-147246094_A03		60.1	Arahy.03	139880863		T	T	T	N	N	T	T	T	T	N	T	T	T	T	N	N	N	N	N	T	T	T	T	N	T	T	N	T	T	T	N	T	T	N	N	T	N	N	N	T	N	N
A03_1	AX-147246135	AX-147246135_B03		62.744	Arahy.03	140429045		T	T	T	N	N	T	T	T	T	N	T	T	T	T	N	N	N	N	N	T	T	T	T	N	T	T	T	T	T	T	N	T	T	N	N	T	N	N	N	T	N	N
A03_1	AX-147218498	AX-147218498_A03		65.199	Arahy.03	140938006		T	T	T	N	N	T	T	T	T	N	T	T	H	T	N	N	N	N	N	T	N	T	T	N	T	T	T	N	T	T	N	T	T	N	N	T	N	N	N	T	N	N
A03_1	AX-147218534	AX-147218534_A03		70.907				T	T	T	N	N	T	T	T	T	N	T	T	N	N	N	N	N	N	N	T	N	T	T	N	T	T	T	N	T	T	N	H	T	N	N	T	N	N	N	T	N	N
A03_1	AX-147218530	AX-147218530_A03		71.093				T	T	T	N	N	T	T	T	T	N	T	T	N	N	N	N	N	N	N	T	N	T	T	N	T	T	T	N	T	T	N	T	T	N	N	T	N	N	N	T	N	N
A03_1	AX-147246197	AX-147246197_B03		71.47				T	T	T	N	N	T	T	T	T	N	T	T	N	N	N	N	N	N	N	T	N	T	T	N	T	T	T	N	T	T	N	T	T	N	N	T	N	N	N	T	N	N
A03_1	AX-147246198	AX-147246198_B03		72.444				T	T	T	N	N	T	T	T	T	N	T	T	-	N	N	H	N	N	H	T	N	T	T	N	T	T	T	N	T	T	N	T	T	N	N	T	N	N	N	T	N	N
A03_1	AX-147218532	AX-147218532_A03		73.331				T	T	T	N	N	T	T	T	T	N	T	T	H	N	N	-	N	N	-	T	N	T	T	N	T	T	T	N	T	H	N	T	T	N	N	T	N	N	N	T	N	N
A03_1	AX-147218640	AX-147218640_A03		83.806	Arahy.03	142488428		T	T	T	T	N	T	N	N	T	T	T	T	T	H	N	T	N	-	T	N	N	T	T	N	T	T	T	N	T	T	N	N	T	N	N	T	N	N	N	T	N	N
A03_1	AX-147218685	AX-147218685_A03		84.705	Arahy.03	142836257		T	T	T	T	N	T	N	N	T	T	T	T	T	T	N	H	N	-	T	N	N	T	T	N	T	T	T	N	T	T	N	N	T	N	N	T	N	N	N	T	-	N
A03_1	AX-147218690	AX-147218690_A03		86.994	Arahy.03	142895317		T	T	T	T	N	T	N	N	T	T	T	T	T	T	N	H	N	H	T	N	N	T	T	N	T	T	T	N	T	T	H	N	T	N	H	T	N	N	N	N	H	T
A03_1	AX-147218678	AX-147218678_A03		93.26	Arahy.03	142777447		T	T	T	T	N	T	N	N	T	T	T	T	T	T	N	H	N	H	T	N	N	T	T	N	T	T	T	N	T	T	N	T	T	N	N	T	N	N	N	T	H	N
A03_2	AX-147215274	AX-147215274_A03		0	Arahy.03	60826		N	N	T	N	T	N	N	N	N	N	T	N	N	N	T	N	N	N	T	N	N	T	N	N	T	N	T	H	N	T	N	N	N	N	T	H	T	N	N	N	N	T
A03_2	AX-147243049	AX-147243049_B03		1.064				N	N	T	N	T	N	N	N	N	N	T	N	N	N	T	N	N	N	T	N	N	T	N	N	T	N	T	-	N	T	N	N	N	N	T	-	T	N	N	N	N	T
A03_2	GM32	Ah1TC3E02	DQ099210	2.483				-	N	T	N	T	N	N	T	N	N	T	N	N	N	T	N	N	N	T	N	N	T	N	N	-	N	T	T	N	T	N	N	N	N	T	T	T	N	N	N	N	T
A03_2	AX-147215309	AX-147215309_A03		6.73	Arahy.03	566273		N	N	T	N	T	N	T	T	N	N	T	N	N	N	T	N	N	N	T	N	N	T	N	N	H	N	T	T	N	T	N	N	N	T	T	N	T	N	N	N	N	T
A03_2	AX-147215308	AX-147215308_A03		8.951	Arahy.03	563661		N	N	T	N	T	N	T	T	N	N	T	N	N	N	T	N	N	N	T	N	N	T	N	N	T	N	T	H	N	T	N	N	N	T	T	H	T	N	N	N	N	T
A03_2	AX-147215316	AX-147215316_A03		10.177	Arahy.03	651187		N	N	T	N	T	N	T	T	N	N	T	N	N	N	T	T	N	N	T	N	N	T	N	N	T	N	T	H	N	T	N	N	N	T	T	H	T	N	N	N	N	T
A03_2	AX-147215441	AX-147215441_A03		23.894	Arahy.03	2395307		N	N	T	H	T	T	T	T	N	N	T	N	H	N	T	T	N	N	T	N	N	T	N	N	T	N	T	H	N	N	N	T	N	T	N	H	T	N	N	N	N	H
A03_2	AX-147243246	AX-147243246_A03		29.418	Arahy.03	3065347		N	N	T	T	N	T	T	T	N	N	T	N	T	N	T	T	N	N	T	N	N	T	N	N	T	N	T	T	N	N	-	T	N	T	N	T	T	N	N	-	N	T
A03/B03	GM612	pPGSseq9H8		0	Arahy.03	8843509		T	T	N	T	N	T	T	T	N	T	N	-	-	T	T	N	T	-	T	N	N	N	N	N	-	N	N	T	T	N	T	N	T	T	T	T	N	N	N	N	N	N
A03/B03	AX-147215828	AX-147215828_A03		1.89	Arahy.03	8819704		T	T	N	T	N	T	T	T	H	T	T	T	T	T	T	H	T	T	T	N	N	N	N	N	T	N	N	T	T	N	T	T	T	T	T	T	N	N	N	N	N	N
A03/B03	AX-147243737	AX-147243737_B03		5.113	Arahy.03	9933734		T	T	N	T	N	T	T	T	N	T	T	T	T	T	T	N	T	T	T	N	N	T	N	N	T	N	N	T	T	N	T	N	T	T	T	T	N	N	T	N	H	N
A03/B03	AX-147243746	AX-147243746_B03		6.721				T	T	N	T	N	T	T	T	N	T	T	T	T	T	T	N	T	T	T	N	N	T	N	N	T	N	N	T	T	N	T	T	T	T	T	T	N	N	T	N	N	N
A03/B03	AX-147216016	AX-147216016_A03		11.576	Arahy.03	11808210		T	T	N	T	N	T	T	T	H	T	T	T	T	T	T	N	T	T	T	N	N	T	N	N	T	N	N	T	T	N	T	T	T	T	T	T	N	N	T	N	T	N
A03/B03	AX-147216101	AX-147216101_A03		17.328	Arahy.03	14262064		T	T	N	T	N	T	T	T	N	T	-	T	N	T	T	N	T	T	T	N	N	N	-	N	T	N	N	N	T	N	N	T	T	T	T	T	N	N	N	T	T	N
A03/B03	AX-147215960	AX-147215960_A03		19.792	Arahy.03	15121324		T	T	N	T	N	T	T	T	N	T	T	T	T	T	T	N	T	T	T	N	N	N	N	N	T	N	N	N	T	N	T	T	T	T	T	T	N	N	T	T	T	N
A03/B03	AX-147216100	AX-147216100_A03		20.686				T	T	N	T	-	T	T	T	N	T	T	T	T	T	T	N	T	T	T	N	N	N	N	N	T	N	N	N	T	-	T	T	T	T	T	T	-	N	T	T	T	N
A03/B03	AX-147241476	AX-147241476_A02		21.13	Arahy.03	16954556		T	T	N	T	N	T	T	T	N	T	T	T	T	T	T	N	T	T	T	N	N	N	N	N	T	N	N	N	T	N	T	T	T	T	T	T	N	N	T	T	T	N
A03/B03	AX-147213883	AX-147213883_A02		22.07	Arahy.03	17167954		T	T	N	T	N	T	T	T	N	T	T	T	T	T	T	N	T	T	T	N	N	N	N	N	T	N	N	N	T	N	T	T	T	T	T	T	N	N	T	T	T	N
A03/B03	AX-147213876	AX-147213876_A02		22.813	Arahy.03	16816116		T	T	N	T	N	T	T	T	N	T	T	T	T	T	T	N	T	T	T	N	N	N	N	N	T	N	N	N	T	N	T	T	T	T	T	T	N	N	T	T	T	N
A03/B03	AX-147213874	AX-147213874_A02		22.977	Arahy.03	16814239		T	T	N	T	N	T	T	T	N	T	T	T	T	T	T	N	T	T	T	N	N	N	N	N	T	N	N	N	T	N	T	T	T	T	T	T	N	N	T	T	T	N
A03/B03	AX-147213898	AX-147213898_A02		23.17	Arahy.03	17726323		T	T	N	T	N	T	T	T	N	-	T	T	T	T	T	N	T	T	T	N	N	N	N	N	T	N	N	N	T	N	T	T	T	T	T	T	N	N	T	T	T	N
A03/B03	AX-147216200	AX-147216200_A03		28.346	Arahy.03	19897608		T	T	N	T	N	T	T	T	N	N	T	T	T	T	T	T	T	T	T	N	N	N	N	N	T	N	-	N	T	N	T	T	T	T	T	T	N	N	T	T	T	N
A03/B03	AX-147216215	AX-147216215_A03		30.396	Arahy.03	20648405		T	T	N	T	N	T	T	T	N	N	T	T	T	T	T	T	T	T	T	N	N	N	N	N	T	N	H	N	T	N	T	H	T	T	T	T	N	N	T	T	T	N
A03/B03	AX-147244073	AX-147244073_B03		32.12	Arahy.03	21930271		T	T	N	T	N	T	T	T	N	-	T	N	T	T	T	T	-	T	T	N	N	N	T	N	T	N	T	N	T	N	T	T	T	T	T	T	-	N	T	T	T	N
A03/B03	AX-147216282	AX-147216282_A03		33.663	Arahy.03	23196032		T	T	N	N	N	T	T	T	N	N	T	T	T	T	T	T	T	T	T	N	N	N	T	N	T	N	H	N	T	N	T	T	T	T	T	T	N	N	T	T	T	N
A03/B03	AX-147244143	AX-147244143_B03		36.065	Arahy.03	23624555		T	T	N	N	N	T	T	T	N	N	T	T	T	T	T	T	T	T	-	N	N	N	T	N	T	N	N	N	T	N	T	T	T	T	T	T	N	N	T	T	T	N
A03/B03	AX-147216318	AX-147216318_B03		37.124				T	T	N	T	N	T	T	T	-	N	T	T	T	T	T	T	T	T	T	N	N	N	T	N	T	N	-	N	T	N	T	T	T	T	T	T	N	N	T	T	T	N
A03/B03	AX-147244154	AX-147244154_A03		37.132	Arahy.03	23914465		T	T	N	T	N	T	T	T	N	N	T	T	T	T	T	T	T	T	T	N	N	N	T	N	T	N	H	N	T	N	T	T	T	T	T	T	N	N	T	T	T	N
A03/B03	GM415	PM238		37.484	Arahy.03	2.39734e+07		T	T	N	T	N	T	T	T	N	N	T	T	-	T	T	T	T	-	T	N	N	N	T	N	-	N	H	N	T	N	T	T	T	T	T	T	N	-	T	-	-	N
A03/B03	AX-147216346	AX-147216346_A03		39.709	Arahy.03	24827422		T	T	N	T	N	T	T	T	N	N	T	T	T	T	T	T	T	T	T	N	T	N	T	N	T	N	H	N	T	N	T	H	T	T	T	T	N	N	T	T	T	N
A03/B03	AX-147216345	AX-147216345_A03		40.074	Arahy.03	24790136		T	T	N	T	N	T	T	T	N	N	T	T	T	T	T	T	T	T	T	N	T	N	T	N	T	N	H	N	T	N	T	T	T	T	T	T	N	N	T	T	T	N
A03/B03	AX-147216364	AX-147216364_A03		40.393	Arahy.03	25560050		T	T	N	T	N	T	T	T	N	N	T	T	T	T	T	T	T	T	T	N	T	N	T	N	T	N	H	N	H	N	T	T	T	T	T	T	N	N	T	T	-	N
A03/B03	AX-147244244	AX-147244244_A03		41.072	Arahy.03	27199427		T	T	N	T	N	T	T	T	N	N	T	T	T	T	T	T	T	T	T	N	T	N	T	N	T	N	H	N	H	N	T	T	T	T	T	T	N	N	T	T	T	N
A03/B03	AX-147216402	AX-147216402_A03		41.073	Arahy.03	27152033		T	T	N	T	N	T	T	T	N	N	T	T	T	T	T	T	T	T	T	N	T	N	T	N	T	N	H	N	H	N	T	T	T	T	T	T	N	N	T	T	T	N
A03/B03	AX-147216429	AX-147216429_A03		42.61	Arahy.03	27498837		T	T	N	T	T	T	T	T	N	T	T	T	T	T	T	T	T	T	T	N	T	N	T	N	T	N	T	N	T	N	T	T	T	T	T	T	N	N	T	T	T	N
A03/B03	AX-147216403	AX-147216403_A03		43.97	Arahy.03	27168547		T	T	N	T	N	T	T	T	N	N	T	T	T	T	T	T	T	T	T	N	T	N	T	N	T	N	H	N	H	N	T	T	T	T	T	T	N	N	T	T	T	N
A03/B03	AX-147244274	AX-147244274_B03		44.301	Arahy.03	27999283		T	T	N	T	N	T	T	T	N	N	T	T	T	T	T	T	T	-	T	N	T	N	T	N	T	N	H	N	H	N	T	T	T	T	T	T	N	N	T	T	T	N
A03/B03	AX-147216509	AX-147216509_A03		45.661	Arahy.03	29902633		T	T	N	T	N	T	T	T	T	N	T	T	T	T	T	T	T	T	T	N	T	N	T	N	T	N	H	N	H	N	T	T	T	T	T	T	N	N	T	T	T	N
A03/B03	AX-147216522	AX-147216522_A03		45.826	Arahy.03	30312941		T	T	N	T	N	T	T	T	T	N	T	T	T	T	T	T	T	T	T	N	T	N	T	N	T	N	H	N	H	N	T	T	T	T	T	T	N	N	T	T	T	N
A03/B03	GM232	gi-29824925		46.156	Arahy.03	30675360		T	T	N	T	N	T	T	T	T	-	T	T	T	T	T	T	T	T	T	N	T	N	T	N	T	N	H	N	H	N	T	T	T	T	T	T	N	-	-	T	T	N
A03/B03	AX-147216629	AX-147216629_A03		47.17	Arahy.03	34530955		T	T	N	T	N	T	T	T	T	N	T	T	T	T	T	T	T	T	T	N	T	N	T	N	T	N	N	N	H	N	T	T	T	T	T	T	N	N	T	T	T	N
A03/B03	AX-147216616	AX-147216616_A03		49.133	Arahy.03	34190547		T	T	N	T	-	T	T	T	T	N	T	T	T	T	T	T	T	T	T	N	T	N	T	N	T	N	-	N	N	N	T	T	T	T	T	T	N	-	T	T	T	N
A03/B03	AX-147259575	AX-147259575_B08		52.235	Arahy.03	42423924		T	T	N	T	N	T	T	T	T	N	T	T	T	T	T	T	T	T	T	N	T	N	N	N	T	N	N	N	-	N	T	T	T	T	T	T	N	T	T	T	T	N
A03/B03	AX-147216772	AX-147216772_A03		53.154	Arahy.03	42612998		T	T	N	T	N	T	T	T	T	N	T	T	T	T	T	T	T	T	T	N	T	N	N	N	T	N	N	N	H	N	T	T	T	T	T	T	N	T	T	T	T	N
A03/B03	GM1	Ah1TC0A01		57.188	Arahy.03	88684604		-	T	N	T	N	T	T	T	T	N	T	T	T	T	T	T	-	T	T	N	T	H	N	T	N	T	N	N	H	N	T	T	T	T	T	T	N	-	T	T	T	N
A03/B03	AX-147244637	AX-147244637_A03		58.03				T	T	N	T	N	T	T	T	T	N	T	T	T	T	T	T	T	T	T	N	T	N	N	T	N	T	N	N	T	N	T	H	T	T	T	T	N	T	T	T	T	N
A03/B03	AX-147244639	AX-147244639_A03		59.749				T	T	N	T	N	T	T	T	T	N	T	T	T	T	T	T	T	T	T	N	T	N	N	T	N	T	N	N	T	N	T	N	T	T	T	T	N	T	T	T	T	N
A03/B03	AX-147216965	AX-147216965_B03		61.469				T	T	N	T	N	T	T	T	T	N	T	T	T	T	T	T	T	T	T	N	T	N	N	T	N	T	N	N	T	N	T	T	T	T	T	T	N	T	T	T	T	N
A03/B03	GM371	PM15		61.799	Arahy.03	57913205		T	T	N	T	N	T	T	T	T	N	T	T	T	T	T	T	T	T	T	N	T	N	N	T	-	T	N	N	T	N	T	T	T	T	T	T	N	T	T	T	T	N
A03/B03	AX-147217141	AX-147217141_A03		62.81	Arahy.03	100294980		T	T	N	T	N	T	T	T	T	N	T	T	T	T	T	T	T	T	T	N	T	N	N	T	N	-	N	N	T	N	T	T	T	T	T	T	N	T	T	T	T	N
A03/B03	AX-147217143	AX-147217143_A03		63.477	Arahy.03	101052629		T	T	N	T	N	T	T	T	T	N	T	T	T	T	T	T	T	T	T	N	T	N	N	T	N	T	N	N	T	N	T	T	T	T	T	T	N	T	T	T	T	N
A03/B03	AX-147217121	AX-147217121_A03		64.1	Arahy.03	88629412		T	T	N	-	N	T	T	T	T	N	T	T	T	T	T	T	T	T	T	N	T	N	N	T	N	T	N	N	-	N	T	T	T	T	T	T	N	T	T	T	T	N
A03/B03	AX-147244843	AX-147244843_B03		64.307	Arahy.03	105689221		T	T	N	T	N	T	T	T	T	N	T	T	T	T	T	T	T	T	T	N	T	N	N	T	N	T	N	N	T	N	T	T	T	T	T	T	N	T	T	T	T	N
A03/B03	AX-147217086	AX-147217086_A03		64.637	Arahy.03	80054608		T	T	N	T	N	T	T	T	T	N	T	T	T	T	T	T	T	T	T	N	T	H	N	T	N	T	N	N	T	N	T	T	T	T	T	T	N	T	T	T	T	N
A03/B03	AX-147217151	AX-147217151_A02		65.135	Arahy.03	103409217		T	T	N	T	N	T	T	T	T	N	T	T	T	T	T	T	T	T	T	N	T	N	N	T	N	T	N	N	T	N	T	T	T	T	T	T	N	T	T	T	T	N
A03/B03	AX-147217197	AX-147217197_A03		65.554	Arahy.03	109761598		T	T	N	T	N	T	T	T	T	N	T	T	T	T	T	T	T	T	T	N	T	N	N	T	N	T	N	N	T	N	T	T	T	T	T	T	N	T	T	T	T	N
A03/B03	AX-147217175	AX-147217175_A03		65.97	Arahy.03	108510146		T	T	N	T	N	T	T	T	T	N	T	T	T	T	T	T	T	T	T	N	T	N	N	T	N	T	N	N	T	N	T	T	T	T	T	T	N	T	T	T	T	N
A03/B03	AX-147217182	AX-147217182_A03		66.134	Arahy.03	108768543		T	T	N	T	N	T	T	T	T	N	T	T	T	T	T	T	T	T	T	N	T	H	N	T	N	T	N	N	T	N	T	T	T	T	T	T	N	T	T	T	T	N
A03/B03	AX-147217226	AX-147217226_A03		67.089	Arahy.03	112079196		T	T	N	T	N	T	T	T	T	N	T	T	T	T	T	T	T	T	T	-	T	H	N	T	N	T	H	N	T	H	T	T	T	T	T	T	N	T	T	T	T	N
A03/B03	GM548	pPGSseq15F12		69.17	Arahy.03	116757053		T	T	N	T	N	T	T	T	T	N	T	T	-	T	T	T	T	-	-	N	T	T	N	T	-	T	N	N	T	N	T	T	T	T	T	T	N	-	-	-	-	-
A03/B03	AX-147244984	AX-147244984_A03		69.492	Arahy.03	116912825		T	T	N	T	N	T	T	T	T	N	T	T	T	T	T	T	T	T	T	N	T	T	N	T	N	T	N	N	T	N	T	T	T	T	T	T	N	T	T	T	T	N
A03/B03	AX-147217292	AX-147217292_A03		69.724	Arahy.03	117001871		T	T	N	T	N	T	T	T	T	N	T	T	T	T	T	T	T	T	T	N	T	H	N	T	N	T	N	N	T	N	T	T	T	T	T	T	N	T	T	T	T	N
A03/B03	GM2215	GM2215_a03	EZ754787	69.724				T	T	N	T	N	T	T	T	T	N	T	T	T	T	T	T	T	T	T	N	T	H	N	T	N	T	N	N	T	N	T	T	T	T	T	T	N	-	T	T	T	N
A03/B03	AX-147217270	AX-147217270_A03		70.109	Arahy.03	116163902		T	T	N	T	-	T	T	T	T	N	T	T	T	T	T	T	T	T	T	N	T	N	N	T	N	T	N	N	T	N	T	T	T	T	T	T	N	T	T	T	T	N
A03/B03	AX-147217257	AX-147217257_A03		70.994	Arahy.03	114953112		T	T	N	T	N	T	T	T	T	N	T	T	T	T	T	T	T	T	T	N	T	N	N	T	N	T	N	N	T	N	T	T	T	T	T	T	N	T	T	T	T	N
A03/B03	AX-147217357	AX-147217357_A03		71.226	Arahy.03	119824173		T	T	N	T	N	T	T	T	T	N	T	T	T	T	T	T	T	T	T	N	T	N	N	T	N	T	N	N	T	N	T	T	T	T	T	T	N	T	T	T	T	N
A03/B03	AX-147260603	AX-147260603_A03		71.556	Arahy.03	120196547		T	T	N	T	N	T	T	T	T	N	T	T	T	T	T	T	T	T	T	N	T	N	N	T	N	T	N	N	T	N	T	T	T	T	T	T	N	T	T	T	T	N
A03/B03	AX-147217370	AX-147217370_A03		72.224	Arahy.03	120638713		T	T	N	T	N	T	T	T	T	N	T	T	T	T	T	T	T	T	T	N	T	H	N	T	N	T	N	N	T	N	T	T	T	T	T	T	N	T	T	T	T	N
A03/B03	AX-147217389	AX-147217389_A03		72.721	Arahy.03	121605023		T	T	N	T	N	T	T	T	T	N	T	T	T	T	T	T	T	T	T	N	T	H	N	T	N	T	N	N	T	N	T	T	T	T	T	T	N	T	T	T	T	N
A03/B03	AX-147245281	AX-147245281_A03		73.559	Arahy.03	121606184		T	T	N	T	N	T	T	T	T	N	T	T	T	T	T	T	T	T	T	N	T	N	N	T	N	T	N	N	T	N	T	T	T	T	T	T	N	T	T	T	T	N
A03/B03	AX-147217433	AX-147217433_A03		74.057	Arahy.03	123182815		T	T	N	T	N	T	T	T	T	N	T	T	T	T	T	T	T	T	T	N	T	H	N	T	N	T	N	N	T	N	T	T	T	T	T	T	N	T	T	T	T	N
A03/B03	AX-147255455	AX-147255455_A03		75.245	Arahy.03	123220313		T	T	N	T	N	T	T	T	T	N	T	T	T	T	T	T	T	T	T	N	T	T	N	T	N	T	N	N	T	N	T	-	T	T	T	T	N	T	T	-	T	N
A03/B03	AX-147252574	AX-147252574_A03		77.893	Arahy.03	123747336		T	T	N	T	N	T	T	T	T	N	T	N	T	T	T	T	T	T	T	N	T	T	N	T	N	T	N	N	T	N	T	T	T	T	T	T	N	T	T	T	T	N
A03/B03	AX-147245159	AX-147245159_B03		78.561	Arahy.03	123940194		T	T	N	T	N	T	T	T	T	N	T	N	T	T	T	T	T	T	T	N	T	H	N	T	N	T	N	N	T	N	T	T	T	T	T	T	N	T	T	T	T	N
A03/B03	AX-147217468	AX-147217468_A03		79.228	Arahy.03	123859040		T	T	N	T	N	T	T	T	T	N	T	N	T	T	T	T	T	T	T	N	T	H	N	T	N	T	N	N	T	N	T	T	T	T	T	T	N	T	T	T	T	N
A03/B03	AX-147217589	AX-147217589_A03		82.064				T	T	N	T	N	T	T	T	T	N	T	N	T	T	T	T	T	T	T	N	T	H	T	N	N	T	N	N	N	T	T	T	T	T	T	T	N	T	N	T	T	N
A03/B03	AX-147242710	AX-147242710_A03		82.564	Arahy.03	126498311		T	T	N	T	N	T	T	T	T	N	T	N	T	T	T	T	T	T	T	N	T	H	T	N	N	T	N	N	N	T	T	T	T	T	T	T	N	T	N	T	T	N
A03/B03	AX-147242703	AX-147242703_A03		83.899	Arahy.03	126626751		T	T	N	T	N	T	T	T	T	N	T	N	T	T	T	T	T	T	T	N	T	T	T	N	N	T	N	N	N	T	T	T	T	T	T	T	N	T	N	T	T	N
A03/B03	AX-147242709	AX-147242709_B02		85.288	Arahy.03	126498489		T	T	N	T	N	T	T	T	T	N	T	N	T	T	T	T	T	T	T	N	T	N	T	N	N	T	N	N	N	T	T	T	T	T	T	T	N	T	N	T	T	N
A03/B03	AX-147217625	AX-147217625_A03		87.987	Arahy.03	127238179		T	T	N	T	-	T	T	T	T	N	T	N	T	T	T	T	T	T	T	N	N	H	T	N	N	T	N	N	N	T	T	T	T	T	T	T	N	T	N	T	T	N
A03/B03	AX-147245332	AX-147245332_B03		89.301	Arahy.03	129221696		T	T	N	T	N	T	T	T	T	N	T	N	T	T	T	T	T	T	T	N	N	H	T	N	N	T	N	N	N	T	T	T	T	T	T	T	N	T	N	T	T	N
A03/B03	AX-147217663	AX-147217663_A03		89.799	Arahy.03	127944913		T	T	N	T	N	T	T	T	T	N	T	N	T	T	T	T	T	T	T	N	N	H	T	N	N	T	N	N	N	T	T	T	T	T	T	T	N	T	N	T	T	N
A03/B03	AX-147217664	AX-147217664_A03		89.963	Arahy.03	127946364		T	T	N	T	N	T	T	T	T	N	T	N	T	T	T	T	T	T	T	N	N	H	T	N	N	T	N	N	N	T	T	T	T	T	T	T	N	T	N	T	T	N
A03/B03	AX-147217660	AX-147217660_B03		90.942	Arahy.03	127904904
A03/B03	AX-147217779	AX-147217779_A03		93.991	Arahy.03	130511075		T	T	-	T	T	T	T	T	T	T	T	-	T	T	T	N	T	T	T	N	N	-	T	N	N	T	-	N	N	T	T	T	T	T	T	T	N	T	N	T	T	N
A03/B03	GM600	pPGSseq19G7		96.168	Arahy.03	1.29577e+08		-	T	N	T	N	T	T	T	T	N	T	N	T	T	T	-	-	-	T	N	N	H	T	N	-	T	N	N	N	T	T	N	T	T	T	T	N	-	N	T	T	N
A03/B03	AX-147245347	AX-147245347_B03		98.405	Arahy.03	129532265		T	T	N	T	N	T	T	T	T	N	T	N	T	T	T	T	T	T	T	N	N	H	T	N	N	T	N	N	N	T	T	T	T	T	T	T	N	T	N	T	T	N
A03/B03	AX-147217776	AX-147217776_A03		99.304	Arahy.03	130488380		T	T	N	T	N	T	T	T	T	N	T	N	T	T	T	T	T	T	T	N	N	N	T	N	N	T	N	N	N	T	T	T	T	T	T	T	N	T	N	T	T	N
A03/B03	AX-147217782	AX-147217782_A03		100.844	Arahy.03	130694312		T	T	N	T	N	T	T	T	T	N	T	N	T	T	T	T	T	T	T	N	N	H	T	N	N	T	N	N	N	T	T	T	T	T	T	T	N	T	N	T	T	N
A03/B03	AX-147238042	AX-147238042_A03		102.205	Arahy.03	130790744		T	T	N	T	N	T	T	T	T	N	T	N	T	T	T	T	T	T	T	N	N	H	T	N	N	T	N	N	N	T	T	H	T	T	T	T	N	T	N	T	T	N
A03/B03	AX-147245463	AX-147245463_B03		105.04	Arahy.03	131875892		T	T	N	T	N	T	T	T	T	N	T	N	T	T	T	N	T	T	T	N	N	T	H	N	H	T	N	N	N	T	T	T	T	T	T	T	N	T	N	T	T	N
A03/B03	AX-147217865	AX-147217865_A03		107.123	Arahy.03	132517306		T	T	N	T	N	T	T	T	T	N	T	N	T	T	T	T	T	T	T	N	N	T	T	N	N	T	N	N	N	T	T	T	T	T	T	T	N	T	N	T	T	N
A03/B03	AX-147245547	AX-147245547_B03		110.167
A03/B03	AX-147217931	AX-147217931_B03		117.709				T	T	N	T	N	T	T	T	T	N	T	N	N	T	T	T	N	N	T	N	N	N	T	N	-	T	N	N	N	T	T	H	N	T	T	T	N	T	N	T	T	-
A03/B03	AX-147245576	AX-147245576_B03		119.414				T	T	N	T	N	T	T	T	T	N	T	N	-	T	T	T	N	N	T	N	N	N	T	N	N	T	N	N	N	T	T	T	N	T	T	T	N	T	N	T	T	H
A03/B03	AX-147217954	AX-147217954_A03		128.454	Arahy.03	133650608		T	T	N	T	N	T	T	T	T	N	T	N	T	T	T	T	N	N	T	N	N	N	T	N	N	T	N	N	N	T	T	T	N	T	T	T	N	T	N	T	T	N
A03/B03	AX-147217955	AX-147217955_A03		128.454	Arahy.03	133651703		T	T	N	T	N	T	T	T	T	N	T	N	T	T	T	T	N	N	T	N	N	N	T	N	N	T	N	N	N	T	T	T	N	T	T	T	N	T	N	T	T	N
A03/B03	AX-147217953	AX-147217953_A03		128.483	Arahy.03	133645755		T	T	N	T	N	T	T	T	T	-	T	N	T	-	T	T	N	N	T	N	N	N	T	N	N	T	N	N	N	T	T	T	N	T	T	T	N	T	N	T	T	-
A03/B03	AX-147245615	AX-147245615_B03		130.069				T	T	N	T	N	T	T	T	T	N	T	N	T	T	T	T	N	N	T	N	N	N	T	N	-	T	N	N	N	T	T	T	N	T	T	T	N	T	N	T	T	T
A03/B03	AX-147245610	AX-147245610_B03		130.669				T	T	N	T	N	T	T	T	T	N	T	N	T	T	T	T	N	N	T	N	N	N	T	N	H	T	N	N	N	T	T	T	N	T	T	T	N	T	N	T	T	H
A03/B03	AX-147217982	AX-147217982_B03		133.316	Arahy.03	133970796		T	T	N	T	T	T	T	T	T	N	T	N	T	T	T	T	N	N	T	N	T	N	T	N	H	T	N	N	N	T	T	T	N	T	T	T	N	T	N	T	T	H
A03/B03	AX-147245627	AX-147245627_B03		134.195				T	T	N	T	T	T	T	T	T	N	T	N	T	T	T	T	N	N	T	N	T	N	T	N	-	T	N	N	N	T	T	T	N	T	T	T	N	T	N	T	T	N
A03/B03	AX-147245672	AX-147245672_B03		137.977				T	T	N	T	T	T	T	T	N	N	T	N	T	T	T	T	N	N	T	N	T	N	T	N	N	T	N	T	N	T	T	T	N	T	T	T	N	T	N	T	T	T
A03/B03	AX-147245678	AX-147245678_B03		142.564	Arahy.03	135148192		T	T	N	T	T	T	T	T	N	N	T	N	T	T	T	T	T	N	T	N	T	N	T	N	-	T	N	T	N	T	T	N	N	T	T	T	N	T	N	T	T	T
A03/B03	AX-147218071	AX-147218071_B03		144.825				T	T	N	T	T	T	T	T	N	N	T	N	T	T	T	T	T	N	T	N	T	N	T	N	T	T	N	T	N	T	T	N	N	T	T	T	N	T	N	T	T	T
A03/B03	AX-147245732	AX-147245732_B03		145.211	Arahy.03	135764182
A03/B03	AX-147245711	AX-147245711_B03		146.222				T	T	N	T	T	T	T	T	N	N	T	N	T	T	T	T	H	N	T	N	T	N	T	N	H	T	N	T	N	T	T	N	N	T	T	T	N	T	N	T	T	T
A03/B03	AX-147245745	AX-147245745_B03		147.128				T	T	N	T	T	T	T	T	N	N	T	N	T	T	T	T	H	N	T	N	T	N	T	-	N	T	N	T	N	T	T	N	N	T	T	T	N	T	N	T	T	T
A03/B03	AX-147245797	AX-147245797_B03		149.032				T	T	N	T	T	T	T	T	N	N	T	N	T	T	T	T	H	N	T	N	T	N	T	H	H	T	N	T	N	T	T	N	N	T	T	T	N	T	N	T	T	T
A03/B03	GM74	Ah2TC7E04	DQ099143	169.986				-	T	T	T	T	N	N	N	N	N	N	T	T	T	T	T	T	-	T	N	T	N	T	T	-	T	N	T	N	T	T	T	-	T	N	T	N	N	N	T	T	T
A03/B03	AX-147218503	AX-147218503_B03		173.621				T	T	T	T	T	T	N	N	N	N	-	T	T	T	T	T	T	N	T	N	T	N	T	T	N	N	N	T	N	T	T	-	N	T	N	T	N	N	N	T	T	N
A03/B03	AX-147246199	AX-147246199_B03		177.87				T	T	T	T	T	T	N	N	N	N	N	T	T	T	T	T	T	N	T	N	N	N	T	T	N	N	N	T	N	T	T	N	N	T	N	T	N	N	N	T	T	N
A03/B03	AX-147218569	AX-147218569_B03		179.599	Arahy.03	141729868		T	T	T	T	T	T	N	N	N	N	N	T	T	T	T	T	T	N	T	N	N	N	-	T	N	N	N	T	-	T	T	N	N	T	N	T	N	N	N	T	-	N
A03/B03	AX-147218575	AX-147218575_A03		182.079				T	T	T	-	T	T	N	N	N	N	N	T	-	T	T	T	T	N	T	-	N	N	T	T	-	N	N	-	N	-	N	-	N	T	N	-	N	N	N	T	T	-
A03/B03	AX-147246218	AX-147246218_B03		184.36				T	T	T	T	T	T	N	N	N	N	N	T	T	T	T	T	T	N	T	N	N	N	T	T	N	N	N	T	N	T	T	-	N	T	N	T	N	N	N	T	T	N
A03/B03	AX-147246224	AX-147246224_B03		185.545				T	T	T	T	T	T	N	N	N	N	T	N	T	T	T	T	T	N	T	N	N	N	T	T	N	N	N	T	N	T	T	N	N	T	N	T	N	N	N	T	T	N
A03/B03	AX-147246237	AX-147246237_B03		187.184				T	T	T	T	T	T	H	N	N	N	H	N	T	T	T	T	T	N	T	N	N	N	T	T	N	N	N	T	N	T	T	H	N	T	N	T	N	N	N	T	-	N
A03/B03	AX-147246257	AX-147246257_B03		188.826				T	T	T	T	T	T	H	N	N	N	H	N	T	T	T	T	T	N	T	N	N	N	T	T	N	N	N	T	N	T	T	T	N	T	N	T	N	N	N	T	H	N
A03/B03	AX-147218599	AX-147218599_B03		190.11				T	T	T	T	T	T	H	N	N	N	H	N	T	T	T	T	T	N	T	H	N	N	T	T	N	N	N	T	N	T	T	T	N	T	N	T	N	N	N	T	H	-
A03/B03	AX-147246222	AX-147246222_B03		191.565
A03/B03	AX-147218583	AX-147218583_B03		192.928				T	T	T	T	T	T	N	N	N	N	H	T	T	T	T	T	T	N	T	N	N	N	T	T	N	N	N	T	N	T	T	T	N	T	N	T	N	N	N	T	H	N
A03/B03	AX-147218510	AX-147218510_A03		196.354				T	T	T	T	T	T	N	N	N	N	H	T	T	T	T	T	T	N	T	N	T	N	T	T	N	N	N	T	N	T	T	N	N	T	N	T	N	N	N	T	T	N
A03/B03	AX-147218491	AX-147218491_A03		199.975				T	T	T	T	T	N	N	N	N	N	H	T	T	T	T	T	T	N	T	N	T	N	T	T	N	N	N	T	N	T	T	N	N	T	N	T	N	N	N	T	T	N
A03/B03	AX-147246145	AX-147246145_B03		207.506				T	T	T	T	T	N	N	N	N	N	N	T	T	T	T	-	T	N	T	N	T	N	T	T	N	N	N	T	N	T	T	N	N	T	N	T	T	N	N	T	T	N
A04	AX-147218859	AX-147218859_A04		0	Arahy.04	1022854		N	N	T	N	T	T	T	T	T	N	N	N	N	N	N	-	T	N	T	T	N	T	T	T	N	N	N	T	N	N	T	T	N	N	N	-	-	N	N	N	N	N
A04	AX-147219011	AX-147219011_A04		30.873	Arahy.04	2660576		N	T	T	N	T	T	N	N	T	N	N	N	N	N	N	T	N	T	T	T	N	T	T	T	T	T	T	N	T	T	T	T	N	T	T	N	T	T	N	N	N	N
A04	AX-147219167	AX-147219167_A04		45.343	Arahy.04	4527205		T	T	T	N	T	T	N	N	T	N	H	T	-	N	N	N	N	T	T	T	N	T	T	T	T	T	T	H	T	T	N	T	N	N	T	N	T	T	N	N	N	N
A04	AX-147219171	AX-147219171_A04		46.267	Arahy.04	4588115		T	T	T	N	T	T	N	N	T	N	N	T	-	N	N	-	N	T	T	T	N	T	T	T	T	T	T	H	T	T	N	T	N	N	T	N	T	T	N	N	N	N
A04	AX-147219189	AX-147219189_A04		49.738	Arahy.04	4935595		T	T	T	N	T	T	T	T	T	N	N	T	H	N	N	H	N	T	T	T	T	T	T	T	T	T	T	T	T	T	N	T	N	N	T	N	T	T	N	N	N	N
A04	AX-147246898	AX-147246898_B04		51.098	Arahy.04	4964897		T	T	T	N	T	T	T	T	T	N	N	T	N	N	N	N	N	T	T	T	T	T	T	T	T	T	T	T	T	T	N	T	N	N	T	N	T	T	N	N	N	N
A04	AX-147219200	AX-147219200_A04		52.283	Arahy.04	5057799		T	T	T	N	T	T	T	T	T	N	N	T	H	N	N	H	N	T	T	T	T	T	T	T	T	T	T	T	T	T	N	T	N	N	T	N	T	T	N	N	N	N
A04	AX-147263521	AX-147263521_B10		54.11	Arahy.04	5372912		T	T	T	T	T	T	T	T	T	T	N	T	T	N	N	T	N	T	T	T	T	T	T	T	T	T	T	T	T	T	N	T	N	N	T	N	T	T	N	N	N	-
A04	AX-147246937	AX-147246937_A04		55.591	Arahy.04	6207034		H	T	T	T	T	T	T	T	T	T	N	T	H	N	N	H	N	T	T	T	T	T	T	T	T	T	T	T	T	T	T	T	N	N	T	N	T	T	N	N	N	H
A04	AX-147247085	AX-147247085_B04		63.267	Arahy.04	9665338		H	T	T	T	N	N	T	T	N	T	N	T	H	N	T	H	N	T	T	T	T	T	T	T	-	T	T	H	T	T	T	T	N	N	T	N	T	T	N	N	T	N
A04	AX-147219426	AX-147219426_A04		64.848	Arahy.04	10215523		-	T	T	T	N	N	T	T	N	T	N	T	N	N	T	N	N	T	T	T	T	T	T	T	T	T	T	-	T	T	T	T	N	N	T	N	T	T	N	N	T	N
A04	AX-147247178	AX-147247178_A04		68.216	Arahy.04	12656247		H	T	T	T	N	N	T	T	N	T	N	T	H	N	T	H	T	T	T	T	T	T	T	T	T	T	T	N	T	T	T	T	N	N	T	T	T	T	N	N	T	N
A04	AX-147247559	AX-147247559_B04		70.656	Arahy.04	37840451
A04	AX-147219971	AX-147219971_A04		71.811	Arahy.04	52538801		-	T	T	T	T	N	T	T	N	T	N	T	T	N	T	T	N	T	T	T	T	T	T	T	T	T	-	-	T	T	T	T	N	N	N	T	T	T	N	N	T	N
A04	GM568	pPGSseq17G6		73.059				-	T	T	T	T	N	T	T	N	T	N	T	-	N	T	T	N	-	T	T	T	T	T	T	-	T	T	-	T	T	T	T	N	N	N	T	T	T	N	N	T	N
A04	AX-147219865	AX-147219865_A04		73.671	Arahy.04	96005340		H	T	T	T	T	N	T	T	N	T	N	T	T	N	T	T	N	T	T	T	T	T	T	T	T	T	T	H	T	T	T	T	N	N	N	T	T	T	N	N	T	N
A04	AX-147220294	AX-147220294_A04		74.002	Arahy.04	95132040		H	T	T	T	T	N	T	T	N	T	N	T	H	N	T	T	N	T	T	T	T	T	T	T	T	T	T	H	T	T	T	T	N	N	N	T	T	T	N	N	T	N
A04	AX-147220134	AX-147220134_A04		74.332	Arahy.04	82448667		H	T	T	T	T	N	T	T	N	T	N	T	H	N	T	T	N	T	T	T	T	T	T	T	T	T	T	H	T	T	T	T	N	N	N	T	T	T	N	N	T	N
A04	AX-147220193	AX-147220193_A04		74.662	Arahy.04	77541499		H	T	T	T	T	N	T	T	N	T	N	T	H	N	T	T	N	T	T	T	T	T	T	T	T	T	H	H	T	T	T	T	N	N	N	T	T	T	N	N	T	N
A04	AX-147220064	AX-147220064_A04		74.993	Arahy.04	68174897		H	T	T	T	T	N	T	T	N	T	N	T	H	N	T	T	N	T	T	T	T	T	T	T	T	T	H	H	T	T	T	T	N	N	N	T	T	T	N	N	T	N
A04	AX-147220042	AX-147220042_A04		74.993	Arahy.04	45305388		H	T	T	T	T	N	T	T	N	T	N	T	H	N	T	T	N	T	T	T	T	T	T	T	T	T	H	H	T	T	T	T	N	N	N	T	T	T	N	N	T	N
A04	AX-147220230	AX-147220230_A04		75.323	Arahy.04	73642721		H	T	T	T	T	N	T	T	N	T	N	T	H	N	T	T	N	T	T	T	T	T	T	T	T	T	H	H	T	T	T	T	N	N	N	T	T	T	N	N	T	N
A04	AX-147220188	AX-147220188_A04		75.323	Arahy.04	76351522		H	T	T	T	T	N	T	T	N	T	N	T	H	N	T	T	N	T	T	T	T	T	T	T	T	T	H	H	T	T	T	T	N	N	N	T	T	T	N	N	T	N
A04	AX-147247572	AX-147247572_A04		75.992	Arahy.04	38382827		H	T	T	T	T	N	T	T	N	T	N	T	H	N	T	T	N	T	T	T	T	T	T	T	T	T	H	H	T	T	T	T	N	N	N	T	T	T	N	N	T	N
A04	AX-147247428	AX-147247428_B04		76.659	Arahy.04	28444959		H	T	T	T	N	N	T	T	N	T	N	T	H	N	T	H	N	T	T	T	T	T	T	T	T	T	T	H	T	T	T	T	N	N	N	T	T	T	N	N	T	N
A04	AX-147219657	AX-147219657_A04		76.989	Arahy.04	20118214		H	T	T	T	N	N	T	T	N	T	N	T	H	N	T	H	N	T	T	T	T	T	T	T	T	T	T	H	T	T	T	T	N	N	N	T	T	T	N	N	T	N
A04	AX-147219563	AX-147219563_A04		77.487	Arahy.04	14924605		H	T	T	T	N	N	T	T	N	T	N	T	H	N	T	H	N	T	T	T	T	T	T	T	T	T	T	H	T	T	T	T	N	N	T	T	T	T	N	N	T	N
A04	AX-147219580	AX-147219580_A04		77.652	Arahy.04	15810680		H	T	T	T	N	N	T	T	N	T	N	T	H	N	T	H	N	T	T	T	T	T	T	T	T	T	T	H	T	T	T	T	N	N	T	T	T	T	N	N	T	N
A04	AX-147219606	AX-147219606_A04		77.816	Arahy.04	17367386		H	T	T	T	N	N	T	T	N	T	N	T	H	N	T	N	N	T	T	T	T	T	T	T	T	T	T	H	T	T	T	T	N	N	T	T	T	T	N	N	T	N
A04	AX-147247346	AX-147247346_A04		78.314	Arahy.04	20692287		H	T	T	T	N	N	T	T	N	T	N	T	H	N	T	N	N	T	T	T	T	T	T	T	T	T	T	H	T	T	T	T	N	N	N	T	T	T	N	N	T	N
A04	AX-147219770	AX-147219770_A04		78.812	Arahy.04	28557342		H	T	T	T	N	N	T	T	N	T	N	T	H	N	T	H	N	T	T	T	T	T	T	T	T	T	H	H	T	T	T	T	N	N	N	T	T	T	N	N	T	N
A04	AX-147219771	AX-147219771_A04		78.976	Arahy.04	29118569		H	T	T	T	N	N	T	T	N	T	N	T	H	N	T	H	H	T	T	T	T	T	T	T	T	T	H	H	T	T	T	T	N	N	N	T	T	T	N	N	T	N
A04	AX-147219630	AX-147219630_A04		79.307	Arahy.04	18338585		H	T	T	T	N	N	T	T	N	T	N	T	H	N	T	H	N	T	T	T	T	T	T	T	T	T	T	H	T	T	T	T	N	N	N	T	T	T	N	N	T	N
A04	AX-147247535	AX-147247535_A04		81.216	Arahy.04	27128784		T	T	T	T	N	N	T	T	N	T	N	T	T	N	T	T	N	T	T	T	T	T	-	T	T	T	T	T	T	T	T	T	N	N	-	T	T	T	N	N	T	N
A04	AX-147247349	AX-147247349_A04		83.087	Arahy.04	20693843		-	T	T	T	N	N	T	T	N	T	N	T	-	N	T	N	N	T	T	T	T	T	T	T	T	T	T	N	T	T	T	T	N	N	N	T	T	T	N	N	T	N
A04	AX-147219733	AX-147219733_A04		83.522	Arahy.04	23541256		-	T	T	T	N	N	T	T	N	T	N	T	T	N	T	N	N	T	T	T	T	T	T	T	T	T	T	N	T	T	T	T	N	N	N	T	T	T	N	N	T	N
A04	AX-147247345	AX-147247345_A04		84.789	Arahy.04	20691471		N	T	T	T	N	N	T	T	N	T	N	T	N	N	T	N	N	T	T	T	T	T	T	T	T	T	T	N	T	T	T	T	N	N	N	T	T	T	N	N	T	N
A04	AX-147247581	AX-147247581_B04		86.477	Arahy.04	38730405		N	T	T	T	T	N	T	T	N	T	N	T	N	N	T	T	N	T	T	T	T	T	T	T	T	T	T	N	T	T	T	T	N	N	N	T	T	T	N	N	T	N
A04	AX-147219520	AX-147219520_A04		88.97	Arahy.04	42471653		T	T	T	T	T	N	T	T	-	T	N	T	N	-	T	T	N	T	T	T	T	T	T	T	T	T	T	-	T	T	T	T	N	N	N	T	T	T	N	N	T	N
A04	AX-147220167	AX-147220167_A04		91.79	Arahy.04	78884843		T	T	T	T	T	N	T	T	N	T	N	T	N	N	T	T	N	T	T	T	T	T	T	T	T	T	N	N	T	T	T	T	N	N	N	T	T	T	N	N	T	N
A04	AX-147246672	AX-147246672_A04		92.545	Arahy.04	77536610		T	T	T	T	T	N	T	T	N	T	N	T	N	N	T	T	N	T	T	T	T	T	T	T	T	T	-	-	T	T	T	T	N	N	N	T	T	T	N	N	T	N
A04	AX-147220257	AX-147220257_A04		93.788	Arahy.04	89009201		-	T	T	T	T	N	T	T	N	T	N	T	-	N	T	T	N	T	T	T	T	T	T	T	T	T	T	N	T	T	T	T	N	N	N	T	T	T	N	N	T	N
A04	AX-147247778	AX-147247778_B04		94.67	Arahy.04	88143293		T	T	T	T	T	N	T	T	N	T	N	T	T	N	T	T	N	T	T	T	T	T	T	T	T	T	T	N	T	T	T	T	N	N	N	T	T	T	N	N	T	N
A04	AX-147247877	AX-147247877_A04		97.178	Arahy.04	100262081		N	T	T	T	T	N	T	T	N	T	N	T	T	N	T	T	N	T	T	T	T	T	T	T	T	T	T	N	T	T	T	T	N	N	N	T	T	T	N	N	T	N
A04	AX-147242305	AX-147242305_A04		98.608	Arahy.04	101862035		T	T	T	T	T	N	T	T	N	T	N	T	T	-	T	T	N	T	T	T	T	T	T	T	T	T	T	N	T	T	T	T	N	N	N	T	T	T	N	N	T	N
A04	AX-147220365	AX-147220365_A04		99.97	Arahy.04	102308648		T	T	T	T	T	N	T	T	N	T	N	T	T	N	T	T	N	T	T	T	T	T	T	T	T	T	T	-	T	T	T	T	N	N	N	T	T	T	N	N	T	N
A04	AX-147247912	AX-147247912_A04		101.134	Arahy.04	102310987		H	T	T	T	T	N	T	T	N	T	N	T	H	N	T	T	N	T	T	T	T	T	T	T	T	T	T	H	T	T	T	T	N	N	N	T	T	T	N	N	T	N
A04	AX-147220347	AX-147220347_A04		101.134	Arahy.04	101089930		H	T	T	T	T	N	T	T	N	T	N	T	H	N	T	T	N	T	T	T	T	T	T	T	T	T	T	H	T	T	T	T	N	N	N	T	T	T	N	N	T	N
A04	AX-147242309	AX-147242309_A04		101.972	Arahy.04	101808059		H	T	T	T	T	N	T	T	N	T	N	T	T	N	T	T	N	T	T	T	T	T	T	T	T	T	T	H	T	T	T	T	N	N	N	T	T	T	N	N	T	N
A04	AX-147247937	AX-147247937_B04		103.512	Arahy.04	102811177		H	T	T	T	T	N	T	T	N	T	N	T	H	N	T	T	N	T	T	T	T	T	T	T	T	T	T	H	T	T	T	T	N	N	N	T	T	T	N	N	T	T
A04	AX-147247946	AX-147247946_A04		105.231	Arahy.04	103093396		N	T	T	T	-	N	T	T	N	T	N	T	N	N	T	T	N	T	T	T	T	T	T	T	T	T	T	N	T	T	T	T	N	N	N	T	T	T	N	N	T	T
A04	AX-147220433	AX-147220433_A04		106.521				-	T	T	T	T	N	T	T	N	T	N	T	N	N	T	T	N	T	T	T	T	T	T	T	T	T	T	T	T	T	T	T	N	N	N	T	T	T	N	N	T	T
A04	AX-147220413	AX-147220413_A04		107.62	Arahy.04	105891550		H	T	T	T	T	N	T	T	N	T	N	T	H	N	T	T	N	T	T	T	T	T	T	T	T	T	T	H	T	T	T	T	N	N	N	T	T	T	N	N	T	T
A04	AX-147220423	AX-147220423_A04		108.118	Arahy.04	106279015		H	T	T	T	T	N	T	T	N	T	N	T	T	N	T	T	N	T	T	T	T	T	T	T	T	T	T	H	T	T	T	T	N	N	N	T	T	T	N	N	T	T
A04	AX-147220467	AX-147220467_A04		108.956	Arahy.04	109519769		H	T	T	T	T	N	T	T	N	T	N	T	-	N	T	T	N	T	T	T	T	T	T	T	T	T	T	H	T	T	T	T	N	N	N	T	T	T	N	N	T	T
A04	AX-147248028	AX-147248028_A04		110.772	Arahy.04	109253357		-	T	T	T	-	N	T	T	N	T	N	T	T	N	T	T	N	T	T	T	T	T	T	T	T	T	T	T	T	T	T	T	N	N	T	T	T	T	N	N	T	T
A04	AX-147248027	AX-147248027_A04		111.634	Arahy.04	109253201		N	T	T	T	T	N	T	T	N	T	N	T	-	N	T	T	N	T	T	T	T	T	T	T	-	T	T	N	T	T	T	T	N	N	T	T	T	T	N	N	T	T
A04	AX-147259119	AX-147259119_A04		114.767	Arahy.04	112221164		N	T	T	T	T	N	T	T	N	T	N	T	T	N	T	T	N	T	T	T	T	T	T	T	T	T	T	N	T	T	T	T	N	N	T	T	T	T	N	N	T	T
A04	AX-147220587	AX-147220587_A04		117.034	Arahy.04	113011837		H	T	T	T	T	N	T	T	N	T	N	T	H	N	T	T	N	T	T	T	T	T	T	N	T	T	T	H	T	T	T	T	N	N	T	T	T	T	N	N	T	T
A04	AX-147220728	AX-147220728_A04		124.891	Arahy.04	116951859		T	T	T	T	T	N	T	T	N	T	N	T	N	N	T	N	N	T	N	T	T	T	T	N	N	T	T	N	T	T	T	T	N	N	T	T	T	T	N	N	T	T
A04	AX-147220806	AX-147220806_A04		130.679				H	T	T	T	T	N	T	T	N	T	N	T	-	N	T	N	N	T	-	T	T	T	T	N	N	T	-	H	T	T	T	N	N	N	T	T	T	T	N	N	T	T
A04	AX-147248344	AX-147248344_B04		131.398				N	T	T	T	T	N	T	T	N	T	N	T	T	N	T	N	N	T	N	T	T	T	T	N	N	T	N	-	T	T	T	N	N	N	T	T	T	T	N	N	T	T
A04	AX-147220804	AX-147220804_A04		132.433				T	T	T	T	T	N	T	T	N	T	N	T	N	N	T	N	N	T	N	T	T	T	T	N	N	T	N	N	T	T	T	N	N	N	T	T	T	T	N	N	T	T
A04	AX-147220808	AX-147220808_A04		133.913				H	T	T	T	-	N	T	T	N	H	N	T	-	N	T	N	N	T	H	T	T	T	T	N	N	T	N	N	T	T	T	N	N	N	T	T	T	T	N	N	T	T
A04	AX-147248454	AX-147248454_B04		140.812	Arahy.04	120762097		N	T	-	T	-	N	T	T	N	T	N	T	H	N	N	N	N	T	H	-	T	T	T	N	N	T	N	-	T	T	-	-	T	N	H	-	T	T	N	N	T	T
A04	AX-147248571	AX-147248571_A04		154.299	Arahy.04	123349054		N	T	N	T	T	N	N	N	N	-	T	T	T	N	N	N	N	T	-	T	T	T	N	N	N	T	N	N	T	T	T	N	T	N	T	T	T	T	T	T	T	T
A04	AX-147221069	AX-147221069_A04		156.082	Arahy.04	123625890		T	T	N	T	T	N	N	N	N	N	T	T	T	N	N	N	N	T	-	T	T	T	N	N	N	T	N	N	T	T	T	N	T	N	T	T	T	T	T	T	T	T
A04	AX-147248592	AX-147248592_A04		157.463	Arahy.04	123619650		T	T	N	T	T	N	N	N	N	N	T	T	T	N	N	N	N	T	H	T	T	T	N	N	N	T	N	N	T	T	T	N	T	N	T	T	T	T	T	T	-	T
A04	AX-147248621	AX-147248621_A05		159.508	Arahy.04	123988712		T	T	N	-	T	N	N	N	N	N	T	T	T	N	N	N	N	T	-	T	T	T	N	N	N	T	N	N	N	T	T	N	T	T	T	T	T	T	T	N	T	T
A04	AX-147221216	AX-147221216_A04		165.41	Arahy.04	125142896		T	T	N	T	T	N	N	N	N	T	T	T	T	T	T	N	N	T	T	T	T	T	N	N	N	T	N	N	N	T	T	N	T	T	T	T	T	T	T	N	T	T
A04	AX-147221380	AX-147221380_A04		170.381	Arahy.04	126792351		T	T	T	T	T	N	N	N	T	T	T	T	T	T	T	T	N	N	T	T	T	T	N	N	N	T	N	N	N	T	T	N	T	T	T	T	T	T	-	N	T	T
A04	AX-147248796	AX-147248796_B04		172.598	Arahy.04	125844243		T	T	T	T	T	N	N	N	T	N	T	T	T	T	T	T	N	N	T	T	T	T	N	N	N	T	N	N	N	T	T	N	T	T	T	T	T	T	T	N	T	T
A04	AX-147248795	AX-147248795_A04		173.271	Arahy.04	125844385		T	T	T	T	T	N	N	N	T	T	T	T	T	T	T	-	N	N	T	T	T	T	N	N	N	T	N	N	N	T	T	N	-	T	T	T	T	T	T	N	T	T
A04	AX-147248797	AX-147248797_A04		173.919				T	T	T	T	T	N	N	N	T	T	T	T	T	T	T	T	N	N	T	-	T	T	N	N	N	T	N	N	N	T	T	N	T	T	-	T	T	T	T	N	T	T
A04	AX-147248800	AX-147248800_B04		173.939				T	T	T	T	T	N	N	N	T	T	T	T	T	T	T	T	N	N	T	T	T	T	N	N	N	-	N	N	N	T	T	N	T	T	T	-	T	T	T	N	T	T
A04	AX-147248790	AX-147248790_A04		174.437				T	T	T	T	T	N	N	N	T	H	T	T	T	T	T	T	N	N	T	T	T	T	N	N	N	T	N	N	N	T	T	N	T	T	T	T	T	T	T	N	T	T
A04	AX-147248789	AX-147248789_A04		175.203				T	T	T	T	T	N	N	N	T	H	-	T	T	T	T	T	N	N	T	T	T	T	N	N	N	T	N	N	N	T	H	N	T	T	T	T	T	T	T	N	T	T
A04	AX-147248794	AX-147248794_A04		175.803	Arahy.04	125844401		T	T	T	T	T	N	N	N	-	H	T	T	-	-	-	T	N	N	T	T	T	T	N	N	N	T	N	N	N	T	H	N	T	T	T	T	-	T	T	N	T	T
A04	AX-147248792	AX-147248792_A04		176.804				T	T	T	T	T	N	N	N	T	H	T	T	T	H	T	T	N	N	T	T	T	T	N	N	N	T	N	N	N	T	H	N	T	T	T	T	T	T	T	N	T	T
A04	AX-147248788	AX-147248788_A04		179.159	Arahy.04	125844766		T	T	T	T	T	N	N	N	T	T	T	T	T	T	T	T	N	N	T	T	T	T	N	N	N	T	N	N	N	T	-	N	T	T	T	T	T	T	T	N	T	T
A04	AX-147248786	AX-147248786_A04		180.922	Arahy.04	125844990		T	T	T	T	T	N	N	N	H	T	-	T	-	T	H	-	N	N	-	-	T	T	N	N	N	-	N	N	N	-	H	N	T	T	-	T	T	T	T	N	T	T
A04	AX-147221349	AX-147221349_B04		186.311	Arahy.04	126661353		-	T	T	T	T	N	N	N	T	T	T	T	-	T	H	T	N	N	-	T	T	T	N	N	N	T	N	N	N	T	T	N	T	T	H	T	-	H	T	N	T	-
A04	AX-147221343	AX-147221343_B04		194.502	Arahy.04	126660023		N	T	T	T	T	N	N	N	T	T	T	T	-	T	-	T	N	N	N	T	T	T	N	N	N	T	N	N	N	T	T	-	T	T	-	T	-	N	T	N	T	N
A04	AX-147256457	AX-147256457_A04		201.795				N	T	T	T	T	N	N	N	T	H	T	T	N	T	N	T	N	N	N	T	T	T	N	N	N	T	N	N	N	T	T	N	N	T	N	T	N	N	-	N	T	N
A04	AX-147221286	AX-147221286_A04		204.167				N	T	T	T	T	N	N	N	T	H	T	T	N	H	N	T	N	N	N	T	T	T	N	N	N	T	N	N	N	T	T	-	N	T	N	T	N	N	-	N	T	N
A04	AX-147249103	AX-147249103_A04		206.871				N	T	T	T	T	N	N	N	T	T	T	T	N	T	N	T	N	N	N	T	T	T	N	N	N	T	N	N	N	T	T	N	N	T	N	T	N	N	H	N	T	N
A04	AX-147248833	AX-147248833_A04		209.36	Arahy.04	126538315		N	T	T	T	T	N	N	N	T	-	T	T	N	T	N	T	N	N	N	T	T	T	N	N	N	T	N	N	N	T	T	N	N	T	N	T	N	N	N	N	T	N
A04	AX-147221375	AX-147221375_A04		210.129	Arahy.04	126766133		N	T	T	T	T	N	N	N	T	T	T	T	N	T	N	T	N	N	N	T	T	T	N	N	N	T	N	N	N	T	T	N	N	T	N	T	N	N	N	N	T	N
A04	AX-147256458	AX-147256458_B07		210.144				N	T	T	T	T	N	N	N	T	T	T	T	N	T	N	T	N	N	N	T	T	T	N	N	N	T	N	N	N	T	T	N	N	T	N	T	N	N	N	N	T	N
A04	AX-147221272	AX-147221272_A04		210.795				N	T	T	T	T	N	N	N	T	T	T	T	N	T	N	T	N	N	N	T	T	T	N	N	N	T	N	N	N	T	T	N	N	T	N	T	N	N	N	N	T	N
A04	AX-147221366	AX-147221366_A04		210.795	Arahy.04	126762599		N	T	T	T	T	N	N	N	T	T	T	T	N	T	N	T	N	N	N	T	T	T	N	N	N	T	N	N	N	T	T	N	N	T	N	T	N	N	N	N	T	N
A04	AX-147248808	AX-147248808_B04		211.251	Arahy.04	126217411		N	T	T	T	T	N	N	N	T	T	T	T	N	T	N	T	N	N	N	T	T	T	N	N	N	T	N	N	N	T	-	N	N	T	N	T	N	N	N	N	T	N
A04	AX-147221321	AX-147221321_A04		211.942	Arahy.04	126520492		N	T	T	T	T	N	N	N	T	T	T	T	N	T	N	T	N	N	N	T	T	T	N	N	N	T	N	N	N	-	T	N	-	T	N	T	-	N	N	N	T	N
A04	AX-147221271	AX-147221271_A04		216.753				-	T	T	T	T	N	N	N	T	H	T	T	-	T	H	T	N	N	-	T	T	T	N	N	N	T	N	N	N	T	T	N	H	T	-	T	H	-	N	N	T	H
A04	AX-147221275	AX-147221275_A04		218.036				-	T	T	T	T	N	N	N	T	H	T	T	H	T	-	T	-	N	H	T	T	T	N	N	N	T	N	N	N	T	T	N	H	T	H	T	H	H	N	N	T	-
A04	AX-147248849	AX-147248849_B04		218.052	Arahy.04	126705703		H	T	T	T	T	N	N	N	T	H	T	T	H	T	-	T	N	N	H	T	T	T	N	N	N	T	N	N	N	T	T	N	H	T	H	T	H	H	N	N	T	H
A04	AX-147248811	AX-147248811_A04		222.888	Arahy.04	126220359		N	T	T	T	T	N	N	N	T	H	T	T	N	T	N	T	N	N	N	T	T	T	N	N	N	T	N	N	N	T	T	N	-	T	N	T	N	N	N	N	T	N
A04	AX-147249105	AX-147249105_A04		222.891				N	T	T	T	T	N	N	N	T	H	T	T	N	T	N	T	N	N	N	T	T	T	N	N	N	T	N	N	N	T	T	N	N	T	N	T	N	N	N	N	T	N
A04	AX-147221317	AX-147221317_A04		225.055	Arahy.04	126349864		N	T	T	T	T	N	N	N	T	T	T	T	N	T	N	T	-	N	-	T	T	T	N	N	N	T	N	N	N	T	T	N	N	T	N	T	N	N	N	N	T	N
A04	AX-147221319	AX-147221319_A04		226.372	Arahy.04	126387779		N	T	T	T	T	N	N	N	T	-	T	T	N	T	N	T	N	N	N	T	T	T	N	N	N	T	N	N	N	T	T	N	-	T	N	T	N	N	N	N	T	N
A04	AX-147221285	AX-147221285_A04		228.285				N	T	T	T	T	N	N	N	T	-	T	T	N	T	N	T	N	N	N	T	T	T	N	N	N	T	N	N	N	T	T	N	N	T	N	T	N	N	N	N	T	N
A04	AX-147248868	AX-147248868_B04		231.653	Arahy.04	127007179		N	T	T	T	T	N	N	N	T	T	T	T	N	T	N	T	N	N	N	T	T	T	N	N	N	T	N	N	N	T	T	-	N	T	N	T	N	N	N	N	T	N
A04	AX-147221427	AX-147221427_B04		243.897	Arahy.04	128540855		N	T	T	T	T	N	N	N	T	T	T	T	T	T	N	T	-	N	N	T	T	T	T	N	N	N	-	N	N	T	T	T	N	T	N	N	N	-	N	T	T	N
A04	AX-147248757	AX-147248757_B04		251.354				N	T	T	T	T	N	T	T	T	T	T	T	T	T	N	T	N	N	N	T	T	T	N	N	N	T	N	N	N	T	T	T	N	T	N	T	N	N	N	N	T	N
A04	AX-147248698	AX-147248698_B04		261.457				N	N	T	T	T	N	T	H	T	T	T	T	N	T	N	T	N	N	N	T	T	T	N	N	N	T	N	N	N	T	T	N	N	T	N	T	N	N	N	N	T	N
A04	AX-147248713	AX-147248713_B04		263.053	Arahy.04	125105943		N	N	T	T	T	N	T	T	T	T	T	T	N	T	N	T	N	N	N	T	T	T	N	N	N	T	N	N	N	T	N	N	N	T	N	T	N	N	N	N	T	N
A04	AX-147248666	AX-147248666_B04		268.319				N	N	N	T	T	N	T	T	N	T	T	T	N	N	N	T	N	N	N	T	T	T	N	N	N	T	N	T	N	T	T	N	N	N	N	T	N	N	N	N	T	N
A04	AX-147248670	AX-147248670_B04		269.102				N	N	N	T	T	N	T	T	N	T	T	T	N	N	N	T	N	N	N	T	T	T	N	N	N	T	N	T	N	T	T	N	N	N	N	T	N	N	N	N	T	N
A04	AX-147221147	AX-147221147_B04		269.674	Arahy.04	124673766		N	N	N	T	T	N	T	T	N	T	T	T	N	N	N	T	N	N	N	T	T	T	N	N	N	T	N	T	N	T	T	N	N	N	N	T	N	N	N	N	-	N
A04	AX-147221148	AX-147221148_B04		270.343	Arahy.04	124674472		N	N	N	T	T	N	T	T	N	T	T	T	N	N	N	T	N	N	N	T	T	T	N	N	N	T	N	T	N	T	T	N	N	N	N	T	N	N	N	N	T	N
A04	AX-147248660	AX-147248660_A04		270.674	Arahy.04	124628001		N	N	N	T	T	N	T	T	N	T	T	T	N	N	N	T	N	N	N	T	T	T	N	N	N	T	N	T	N	T	T	N	N	N	N	T	N	N	N	N	H	N
A04	AX-147248662	AX-147248662_B04		270.674	Arahy.04	124628515		N	N	N	T	T	N	T	T	N	T	T	T	N	N	N	T	N	N	N	T	T	T	N	N	N	T	N	T	N	T	T	N	N	N	N	T	N	N	N	N	H	N
A04	AX-147221126	AX-147221126_B04		270.674	Arahy.04	124628932		N	N	N	T	T	N	T	T	N	T	T	T	N	N	N	T	N	N	N	T	T	T	N	N	N	T	N	T	N	T	T	N	N	N	N	T	N	N	N	N	H	N
A04	AX-147221124	AX-147221124_B04		270.674	Arahy.04	124565790		N	N	N	T	T	N	T	T	N	T	T	T	N	N	N	T	N	N	N	T	T	T	N	N	N	T	N	T	N	T	T	N	N	N	N	T	N	N	N	N	H	N
A04	AX-147248655	AX-147248655_B04		272.572	Arahy.04	124439444		N	N	N	T	T	N	T	T	N	T	T	T	N	N	N	T	N	N	N	T	T	T	N	N	N	T	N	T	N	T	T	N	N	N	N	T	N	N	N	N	H	N
A04	AX-147221096	AX-147221096_A04		274.382	Arahy.04	124022460		N	N	N	T	T	N	T	T	N	T	T	T	N	T	N	T	N	N	N	T	T	T	N	N	N	T	N	T	N	T	T	N	N	N	N	T	N	N	N	N	H	N
A04	AX-147235042	AX-147235042_B03		280.434
A04	AX-147220940	AX-147220940_B04		289.084				N	N	N	N	-	N	T	T	N	T	T	-	-	N	T	N	N	N	N	T	T	T	N	N	N	T	N	T	N	T	N	N	N	N	N	T	T	T	N	N	-	N
A04	AX-147220942	AX-147220942_A04		290.349	Arahy.04	121015151		N	N	N	N	N	N	T	T	N	T	T	T	N	N	T	-	N	N	N	N	T	T	N	N	N	T	N	T	N	T	N	N	N	N	N	T	T	T	N	N	N	N
A04	AX-147220948	AX-147220948_B04		291.345				N	N	N	N	N	N	T	T	N	T	T	T	N	N	T	-	N	N	N	N	T	T	N	N	N	T	N	T	N	T	N	N	N	N	N	T	T	T	N	N	N	N
A04	AX-147220938	AX-147220938_A04		291.345	Arahy.04	121004432		N	N	N	N	N	N	T	T	N	T	T	T	N	N	T	N	N	N	N	N	T	T	N	N	N	T	N	T	N	T	N	N	N	N	N	T	T	T	N	N	N	N
A04	AX-147220927	AX-147220927_A04		291.508				N	N	N	N	N	N	T	T	N	T	T	T	N	N	T	N	N	N	N	N	T	T	N	N	-	T	N	T	N	T	N	N	N	N	N	T	T	T	N	N	N	N
A04	AX-147220941	AX-147220941_B04		291.674				N	N	N	N	N	N	T	T	N	T	T	T	N	N	T	N	N	N	N	N	T	T	N	N	T	T	N	T	N	T	N	N	N	N	N	T	T	T	N	N	N	N
A04	AX-147220937	AX-147220937_B04		292.689				N	N	N	N	-	N	T	T	N	T	T	T	N	N	T	N	N	N	N	N	T	T	N	N	T	T	N	T	N	T	N	N	N	N	N	T	T	T	N	N	N	N
A04	AX-147220933	AX-147220933_B04		293.633				N	N	N	N	N	N	T	T	N	T	T	T	N	N	T	-	N	N	N	N	T	T	N	N	-	T	N	T	N	T	N	N	N	N	N	T	T	T	N	N	N	N
A04	AX-147220949	AX-147220949_A04		293.814	Arahy.04	121016072		N	N	N	N	N	N	T	T	N	T	T	T	N	N	T	-	N	N	N	N	T	T	N	N	N	T	N	T	N	T	N	N	N	N	N	T	T	T	N	N	N	N
A04	AX-147220936	AX-147220936_B04		294.89				N	N	N	N	N	N	T	T	N	T	T	T	N	N	T	H	N	N	N	N	T	T	N	N	H	T	N	T	N	T	N	N	N	N	N	T	T	T	N	N	N	N
A04	AX-147220945	AX-147220945_B04		295.138				N	N	N	N	N	N	T	T	N	T	T	T	N	N	T	H	N	N	N	N	T	T	N	N	H	-	N	T	N	T	N	N	N	N	N	T	T	T	N	N	N	N
A04	AX-147220935	AX-147220935_B04		295.25				N	N	N	N	N	N	T	T	N	T	T	T	N	N	T	H	N	N	N	N	T	T	N	N	H	T	N	T	N	T	N	N	N	N	N	T	T	T	N	N	N	N
A04	AX-147220928	AX-147220928_A04		295.388				N	N	N	N	N	N	T	T	N	-	T	T	N	N	T	H	N	N	N	N	T	T	N	N	H	T	N	T	N	T	N	N	N	N	N	T	T	T	N	N	N	N
A04	AX-147220946	AX-147220946_B04		295.886				N	N	N	N	N	N	T	T	N	T	T	T	N	N	T	H	N	N	N	N	T	T	N	N	H	T	N	T	N	T	N	N	N	N	N	T	T	T	N	N	N	N
A04	AX-147220939	AX-147220939_B04		296.562				N	N	N	N	N	N	T	T	N	T	T	T	N	N	T	H	N	N	N	N	T	T	-	N	T	T	N	T	N	T	N	N	N	N	N	T	T	T	N	N	N	N
A04	AX-147220950	AX-147220950_B04		298.653	Arahy.04	120937208		N	N	N	N	N	N	T	T	T	T	T	T	-	N	T	T	T	N	N	N	T	T	N	N	T	T	N	T	N	T	N	-	N	N	-	T	T	T	N	N	N	N
A05/B05	AX-147248934	AX-147248934_B05		0	Arahy.05	1800586		N	N	N	N	T	N	T	T	N	T	N	T	N	T	T	T	N	N	N	N	N	N	N	N	T	N	N	N	N	N	N	N	N	T	N	N	N	N	N	N	N	N
A05/B05	AX-147221466	AX-147221466_A05		14.562	Arahy.05	1428598		-	-	N	N	T	N	T	T	N	T	-	T	N	T	T	T	T	-	N	N	-	-	-	N	T	N	N	-	N	N	T	T	-	T	-	-	T	T	T	-	N	T
A05/B05	AX-147249117	AX-147249117_B05		27.81	Arahy.05	8291509		N	N	N	N	T	T	T	T	T	T	N	T	T	T	T	T	T	N	T	N	N	N	N	T	T	T	N	T	T	T	-	-	N	T	T	N	T	T	T	N	T	T
A05/B05	AX-147221674	AX-147221674_A05		29.551	Arahy.05	8320903		-	N	N	N	T	T	T	T	T	T	N	T	T	T	T	T	T	N	T	N	N	N	N	T	T	T	N	T	T	T	H	N	N	T	T	N	T	T	T	N	T	T
A05/B05	AX-147249033	AX-147249033_B05		30.907	Arahy.05	6331769		N	N	N	-	T	T	T	T	T	T	-	T	T	T	T	T	T	N	T	N	N	N	N	T	T	T	N	T	T	T	-	N	N	T	T	N	T	T	T	N	T	T
A05/B05	AX-147221604	AX-147221604_A05		32.552	Arahy.05	6608173		N	N	N	N	T	T	T	T	T	T	N	T	T	T	T	T	T	N	T	N	N	N	N	T	T	T	N	T	T	T	-	N	N	T	T	N	T	T	T	N	T	T
A05/B05	AX-147249032	AX-147249032_A05		33.119	Arahy.05	6331700		N	N	N	N	T	T	T	T	T	T	N	T	T	T	T	T	T	N	T	N	N	N	N	T	T	T	N	T	T	T	H	N	N	T	T	N	T	T	T	N	T	T
A05/B05	AX-147249099	AX-147249099_A05		34.064	Arahy.05	7865324		N	N	N	N	T	T	T	T	T	T	N	T	T	T	T	T	T	N	T	N	N	N	N	T	T	T	N	T	T	T	H	N	N	T	T	N	T	T	T	N	T	T
A05/B05	AX-147221650	AX-147221650_A05		34.733	Arahy.05	7729895		N	N	N	N	T	T	T	T	T	T	N	T	T	T	T	T	T	N	T	N	N	N	N	T	T	T	N	T	T	T	H	N	N	T	T	N	T	T	T	N	T	T
A05/B05	AX-147249111	AX-147249111_A05		35.4	Arahy.05	8060827		N	N	N	N	T	T	T	T	T	T	N	T	T	T	T	T	T	N	T	N	N	N	N	T	T	T	N	T	T	T	H	N	N	T	T	N	T	T	T	N	T	T
A05/B05	AX-147249121	AX-147249121_B05		35.564	Arahy.05	8293158		N	N	N	N	T	T	T	T	T	T	N	T	T	T	T	T	T	N	T	N	N	N	N	T	T	T	N	T	T	T	T	N	N	T	T	N	T	T	T	N	-	T
A05/B05	AX-147249115	AX-147249115_B05		35.729	Arahy.05	8287793		N	N	N	N	T	T	T	T	T	T	N	T	T	T	T	T	T	N	T	N	N	N	N	T	T	T	N	T	T	T	T	N	N	T	T	N	T	T	T	N	T	T
A05/B05	AX-147221670	AX-147221670_A05		36.174	Arahy.05	8316263		N	N	N	N	T	T	T	T	T	T	N	T	T	T	T	T	T	N	T	N	N	N	N	T	T	T	N	T	T	T	T	N	N	T	T	N	T	T	T	N	T	T
A05/B05	AX-147221673	AX-147221673_A05		36.395	Arahy.05	8320341		N	N	N	N	T	T	T	T	T	T	N	T	T	T	T	T	T	N	T	N	N	N	N	T	T	T	N	T	T	T	H	N	N	T	T	N	T	T	T	N	T	T
A05/B05	AX-147249122	AX-147249122_A05		36.895	Arahy.05	8320739		N	N	N	N	T	T	T	T	T	T	N	T	T	T	T	T	T	-	T	N	N	N	N	T	T	T	N	T	T	T	T	N	N	T	T	N	T	T	T	N	T	T
A05/B05	AX-147221671	AX-147221671_A05		37.393	Arahy.05	8317213		N	N	N	N	T	T	T	T	T	T	N	T	T	T	T	T	T	N	T	N	N	N	N	T	T	T	N	T	T	T	T	N	N	T	T	N	T	T	T	N	T	T
A05/B05	AX-147249119	AX-147249119_B05		37.557	Arahy.05	8291814		N	N	N	N	T	T	T	T	T	T	N	T	T	T	T	T	T	N	T	N	N	N	N	T	T	T	N	T	T	T	T	N	N	T	T	N	T	T	T	N	T	T
A05/B05	AX-147221769	AX-147221769_A05		41.583	Arahy.05	10813761		N	N	N	N	T	T	T	T	T	T	N	T	T	T	T	T	T	N	T	T	N	N	-	T	T	T	N	T	T	T	T	N	N	T	T	T	T	T	T	N	T	T
A05/B05	AX-147221774	AX-147221774_A05		42.254	Arahy.05	10817766		N	N	N	N	T	T	T	T	T	T	N	T	T	T	-	T	T	N	T	T	N	N	N	T	T	T	N	T	T	T	T	N	N	T	T	T	T	T	T	N	T	T
A05/B05	AX-147221765	AX-147221765_A05		43.793	Arahy.05	10810527		N	N	N	N	T	T	T	T	T	T	N	T	T	T	T	T	T	N	T	T	N	N	N	T	T	T	N	T	T	T	T	N	N	T	T	T	T	T	T	N	T	T
A05/B05	AX-147221771	AX-147221771_A05		44.761	Arahy.05	10815400		N	N	N	N	T	T	T	T	T	T	N	T	T	T	T	T	T	N	T	T	N	N	-	T	T	T	N	T	T	T	T	-	N	T	T	T	T	T	T	N	T	T
A05/B05	AX-147221770	AX-147221770_B02		45.135	Arahy.05	10815082
A05/B05	AX-147249170	AX-147249170_A05		46.127	Arahy.05	10003791		N	-	N	N	T	T	T	T	T	T	N	T	T	T	T	T	T	N	T	T	N	N	N	T	-	T	N	T	T	T	T	N	N	T	T	T	T	T	T	N	T	T
A05/B05	AX-147249202	AX-147249202_B05		47.334				N	T	N	N	T	T	T	T	T	T	N	T	T	T	T	T	T	N	T	T	N	N	N	T	T	T	N	T	T	T	T	N	-	T	T	T	T	T	T	N	T	T
A05/B05	AX-147221775	AX-147221775_A05		48.346	Arahy.05	10818127		N	N	N	N	T	T	T	T	T	T	N	T	T	T	T	T	T	N	T	T	N	N	N	H	T	T	N	T	T	T	T	N	N	T	T	T	T	T	T	N	T	T
A05/B05	AX-147249169	AX-147249169_A05		49.485	Arahy.05	10002949		N	N	N	N	T	T	T	T	T	T	N	T	T	T	H	T	T	N	T	T	N	N	N	H	T	T	N	T	T	T	H	N	N	T	T	T	T	T	T	N	T	T
A05/B05	AX-147221757	AX-147221757_A05		49.859	Arahy.05	10627797		N	N	N	N	T	T	T	T	T	T	N	T	T	T	H	T	T	N	T	T	N	N	N	H	T	T	N	T	T	T	H	N	N	T	T	T	T	T	T	N	T	T
A05/B05	AX-147249198	AX-147249198_B05		50.023	Arahy.05	10762355		N	N	N	N	T	T	T	T	T	T	N	T	T	T	H	T	T	N	T	T	N	N	N	H	T	T	N	T	T	T	H	N	N	T	T	T	T	T	T	N	T	T
A05/B05	AX-147221777	AX-147221777_A05		50.202	Arahy.05	10924497		N	N	N	N	T	T	T	T	T	T	N	T	T	T	H	T	T	N	T	T	N	N	N	H	T	T	N	T	T	T	H	N	N	-	T	T	T	T	T	N	T	T
A05/B05	AX-147249232	AX-147249232_A05		51.973	Arahy.05	11590272		N	N	N	N	T	T	T	T	T	T	N	T	T	T	T	N	T	N	T	T	N	N	N	-	T	T	T	T	T	T	N	N	N	H	T	T	T	T	T	N	T	T
A05/B05	AX-147221806	AX-147221806_A05		53.203	Arahy.05	11846298		N	N	N	N	T	T	T	T	T	T	N	T	T	T	-	N	T	N	T	T	N	N	N	N	T	T	T	T	T	T	N	N	N	T	T	T	T	T	T	N	T	T
A05/B05	AX-147249293	AX-147249293_B05		57.131	Arahy.05	13028980		N	N	N	N	T	T	T	T	T	T	N	T	T	T	N	T	T	N	T	T	N	N	N	H	T	N	T	T	T	T	T	N	N	T	T	T	T	T	T	N	T	T
A05/B05	AX-147222455	AX-147222455_A05		59.41	Arahy.05	16023222		N	N	N	N	T	T	T	T	T	T	N	T	T	T	N	H	T	N	T	T	N	N	N	H	T	N	T	T	T	T	H	H	N	T	T	T	T	T	T	N	T	T
A05/B05	AX-147222452	AX-147222452_A05		61.107	Arahy.05	16986589		N	N	N	N	H	T	T	T	T	T	N	T	T	T	N	-	T	N	T	T	N	N	N	H	T	N	T	T	T	T	-	N	N	T	T	T	T	T	T	N	T	T
A05/B05	GM68	Ah1TC6E01	DQ099175	63.44	Arahy.05	2.63384e+07		N	N	N	N	T	T	T	T	T	T	N	T	T	T	N	H	T	N	T	T	N	N	N	T	-	N	T	T	T	T	H	N	N	H	T	T	T	T	T	N	T	T
A05/B05	AX-147222432	AX-147222432_A05		64.802	Arahy.05	19847289		N	N	N	N	T	T	T	T	T	T	N	T	T	T	N	H	T	N	T	T	N	N	N	H	T	N	T	T	T	T	H	N	N	-	T	T	T	T	T	N	T	T
A05/B05	AX-147222423	AX-147222423_A05		64.812	Arahy.05	22892630		N	N	N	N	T	T	T	T	T	T	N	T	T	T	N	H	T	N	T	T	N	N	N	H	T	N	T	T	T	T	H	N	N	T	T	T	T	T	T	N	T	T
A05/B05	AX-147249817	AX-147249817_A05		65.476	Arahy.05	24146490		N	N	N	N	T	T	T	T	T	T	N	T	T	T	N	H	T	N	T	T	N	N	N	T	T	N	T	T	T	T	H	N	N	T	T	T	T	T	T	N	T	T
A05/B05	AX-147222411	AX-147222411_B05		66.014				N	N	N	N	T	T	T	T	T	T	N	T	T	T	N	H	T	N	T	T	N	N	N	T	T	N	T	T	T	T	H	N	N	T	T	T	T	T	T	N	T	T
A05/B05	AX-147249791	AX-147249791_B05		67.334	Arahy.05	25438663		N	N	N	N	T	T	T	T	T	T	N	T	T	T	N	N	T	N	T	T	N	N	N	T	T	N	T	T	T	T	N	N	N	T	T	T	T	T	T	N	T	T
A05/B05	AX-147249726	AX-147249726_B05		68.872	Arahy.05	30144803		N	N	N	N	T	T	T	T	T	T	N	T	T	T	N	N	T	N	T	T	N	N	N	T	T	N	N	T	T	T	N	T	N	T	T	T	T	T	T	N	T	T
A05/B05	AX-147222289	AX-147222289_A05		72.232	Arahy.05	30606291		N	N	N	N	T	T	T	T	T	T	N	T	T	T	N	T	T	N	T	T	N	N	T	T	T	N	N	T	-	-	N	N	N	T	-	T	-	T	T	N	T	T
A05/B05	AX-147222291	AX-147222291_A05		74.605	Arahy.05	30564420		N	N	N	N	T	T	T	T	T	T	N	T	T	T	N	H	T	N	T	T	N	N	N	T	T	N	N	T	T	T	H	N	N	T	T	T	T	T	T	N	T	T
A05/B05	AX-147249632	AX-147249632_A05		75.443	Arahy.05	33922530		N	N	N	N	T	T	T	T	T	T	-	T	T	T	N	H	T	N	T	T	N	N	N	T	T	N	N	T	T	T	H	N	N	T	T	T	T	T	T	N	T	T
A05/B05	AX-147238923	AX-147238923_A05		76.508	Arahy.05	34206970		N	N	N	N	T	T	T	T	T	T	N	T	T	T	N	N	T	N	T	T	N	N	N	T	T	N	N	T	T	T	-	N	N	T	T	T	T	T	T	N	T	T
A05/B05	AX-147222102	AX-147222102_A05		79.433	Arahy.05	37787623		N	N	N	N	-	T	T	T	T	T	N	T	T	T	N	N	H	N	T	T	N	N	N	T	T	N	N	T	T	T	N	N	N	H	T	T	T	T	N	N	T	T
A05/B05	GM500	pPGSseq10D4		80.707	Arahy.05	36545548		N	N	N	N	T	T	T	T	T	T	N	T	T	H	N	H	T	N	T	T	N	N	N	T	T	N	N	T	T	T	N	N	N	H	T	T	T	T	N	N	T	T
A05/B05	AX-147221997	AX-147221997_A05		82.432	Arahy.05	40313276		N	N	N	N	T	T	T	T	T	T	N	T	T	T	N	H	T	N	T	T	N	N	N	T	T	N	N	T	T	T	N	N	N	H	T	T	T	T	N	N	T	T
A05/B05	AX-147222004	AX-147222004_A05		82.527	Arahy.05	40088097		N	N	N	N	T	T	T	T	T	T	N	T	T	T	N	H	T	N	T	T	N	N	N	T	T	N	N	T	T	T	N	N	N	-	T	T	T	T	N	N	T	T
A05/B05	AX-147222000	AX-147222000_A05		82.596	Arahy.05	40251601		N	N	N	N	T	T	T	T	T	T	N	T	T	T	N	H	T	N	T	T	N	N	N	T	T	N	N	T	T	T	N	N	N	T	T	T	T	T	N	N	T	T
A05/B05	AX-147221980	AX-147221980_A05		83.607	Arahy.05	41088217		N	N	N	N	T	T	T	T	T	T	N	T	T	T	N	H	T	N	T	T	N	N	N	T	T	N	N	T	T	T	N	T	N	T	T	T	T	T	N	N	T	N
A05/B05	GM28	Ah1TC3A12	DQ099223	85.682	Arahy.05	4.14772e+07		N	N	N	N	T	-	T	T	T	T	N	T	T	T	N	H	T	N	T	T	N	N	N	T	T	N	N	T	T	T	N	-	N	T	T	T	T	-	N	N	T	N
A05/B05	GM23	Ah1TC2D08		87.794	Arahy.05	77948171		N	N	N	N	T	T	T	T	T	T	N	T	T	T	N	H	T	N	T	T	N	N	N	T	-	N	N	T	T	T	N	N	N	T	T	T	T	-	N	N	T	N
A05/B05	GM382	PM45		88.3	Arahy.05	4.79557e+07		N	N	N	N	T	T	T	T	T	T	N	T	T	T	N	H	T	N	T	T	N	N	N	T	-	N	N	T	T	T	N	N	N	H	T	T	T	T	N	N	T	N
A05/B05	AX-147222609	AX-147222609_A05		89.141	Arahy.05	55293736		N	N	N	N	T	T	T	T	T	T	N	T	T	T	N	H	T	N	T	T	N	N	N	T	T	N	N	T	T	T	N	N	N	T	T	T	T	T	N	N	T	N
A05/B05	AX-147222611	AX-147222611_A05		89.141	Arahy.05	55266372		N	N	N	N	T	T	T	T	T	T	N	T	T	T	N	H	T	N	T	T	N	N	N	T	T	N	N	T	T	T	N	N	N	T	T	T	T	T	N	N	T	N
A05/B05	AX-147222417	AX-147222417_A05		89.823	Arahy.05	65051276		N	N	N	N	T	T	T	T	T	T	N	T	T	T	N	T	T	N	T	T	N	N	N	T	T	N	N	T	T	T	N	N	N	-	T	T	T	T	N	N	T	N
A05/B05	AX-147221967	AX-147221967_A05		91.177	Arahy.05	41248626		N	N	N	N	T	T	T	T	T	T	N	T	T	T	N	T	T	N	T	T	N	N	N	T	T	N	N	T	T	T	N	N	N	T	T	T	T	T	N	N	T	N
A05/B05	AX-147251085	AX-147251085_B05		93.511	Arahy.05	88613678		N	N	T	N	T	T	T	T	T	T	N	T	T	T	N	-	T	N	T	T	N	N	N	T	T	N	N	T	T	T	N	N	N	T	T	T	T	T	-	N	T	N
A05/B05	AX-147222743	AX-147222743_A05		94.712	Arahy.05	88216016		N	N	H	N	T	T	T	T	T	T	N	T	T	T	N	H	T	N	T	T	N	N	N	T	T	N	N	T	T	T	N	N	N	T	T	T	T	T	N	N	T	N
A05/B05	AX-147222843	AX-147222843_A05		96.742	Arahy.05	90899338		N	N	H	N	T	T	T	T	T	T	N	T	T	T	N	H	T	N	T	T	N	N	N	T	T	N	N	N	T	T	N	N	N	T	T	T	T	T	N	N	T	N
A05/B05	AX-147250912	AX-147250912_A05		99.737	Arahy.05	92195126		N	N	T	T	T	T	T	T	H	T	N	T	N	T	N	-	-	N	T	T	N	N	N	T	-	N	N	N	T	T	N	N	N	T	T	T	T	T	N	N	T	N
A05/B05	AX-147250857	AX-147250857_A05		103.653	Arahy.05	93042250		N	N	-	T	T	T	T	T	T	T	N	T	N	T	N	N	T	N	T	T	N	N	N	T	T	N	N	N	T	T	T	N	N	H	T	T	T	T	N	N	T	N
A05/B05	AX-147223010	AX-147223010_A05		105.251	Arahy.05	94077354		N	N	H	T	T	T	T	T	N	T	N	T	N	T	N	H	T	N	T	T	N	N	N	T	T	N	N	N	T	N	T	N	N	H	T	T	T	T	N	N	T	N
A05/B05	AX-147223038	AX-147223038_A05		108.616	Arahy.05	94692256		N	N	H	T	T	T	T	T	N	T	N	H	N	T	N	H	T	N	T	T	N	N	N	T	T	N	N	N	T	N	H	T	N	H	T	T	T	T	N	N	T	N
A05/B05	AX-147223064	AX-147223064_A05		110.233	Arahy.05	95184631		N	N	H	T	T	T	T	T	N	T	N	T	N	T	N	N	T	N	H	T	N	N	N	T	T	N	N	N	T	N	H	T	N	H	T	T	T	T	N	N	T	N
A05/B05	AX-147250761	AX-147250761_A05		112.508	Arahy.05	95694006		N	N	T	T	T	T	T	T	N	T	N	T	N	T	N	N	T	N	-	T	N	N	N	T	T	N	N	N	T	N	T	T	N	-	T	T	T	T	N	N	T	T
A05/B05	AX-147223119	AX-147223119_A05		114.601	Arahy.05	96580970		N	N	H	-	T	T	T	-	N	T	N	T	N	T	N	N	T	N	H	T	N	N	N	T	T	N	N	N	T	N	T	T	N	-	T	T	T	T	N	N	T	T
A05/B05	AX-147250725	AX-147250725_A05		116.145	Arahy.05	96916540		N	N	H	T	T	T	T	T	N	T	N	T	N	T	N	N	T	N	H	T	N	N	N	T	N	N	N	N	T	N	T	T	N	H	T	T	T	T	N	N	H	T
A05/B05	AX-147223176	AX-147223176_A05		117.922	Arahy.05	97344064		N	N	H	T	T	T	T	T	N	T	N	T	N	T	N	N	T	N	T	T	N	N	N	T	N	N	N	N	T	N	T	T	N	H	T	T	T	T	N	N	H	T
A05/B05	AX-147250686	AX-147250686_A05		118.372	Arahy.05	97696193		N	N	H	T	T	T	T	T	N	T	N	T	N	T	N	N	T	N	H	T	N	N	N	T	N	N	N	N	T	N	T	T	N	H	T	T	T	T	N	N	H	T
A05/B05	AX-147223161	AX-147223161_A05		118.537	Arahy.05	97275041		N	N	H	T	T	T	T	T	N	T	N	T	N	T	N	N	T	N	H	T	N	N	N	T	N	N	N	N	T	N	T	T	N	H	T	T	T	T	N	N	H	T
A05/B05	AX-147223210	AX-147223210_A05		119.248	Arahy.05	98196230		N	N	H	T	T	T	T	T	N	T	N	T	N	T	N	N	T	N	H	T	N	N	N	T	N	N	N	N	T	N	T	T	N	H	T	T	T	T	N	N	H	T
A05/B05	AX-147250615	AX-147250615_B05		121.831	Arahy.05	99315947		N	N	H	T	T	T	T	T	N	T	N	T	N	T	N	H	T	N	H	T	N	N	N	T	N	N	N	N	T	N	H	T	N	-	T	T	T	T	N	N	N	T
A05/B05	AX-147223267	AX-147223267_A05		122.527	Arahy.05	99668759		N	N	H	T	T	T	T	T	H	T	N	T	N	T	N	H	T	N	H	T	N	N	N	T	N	N	N	N	T	N	H	T	N	H	T	T	T	T	N	N	N	T
A05/B05	AX-147223295	AX-147223295_A05		124.802	Arahy.05	100450189		N	N	T	T	T	T	T	T	H	T	N	T	N	T	N	H	T	N	T	T	N	N	N	N	N	N	N	N	T	N	H	T	N	H	T	T	T	T	N	N	N	T
A05/B05	AX-147223336	AX-147223336_A05		128.234	Arahy.05	101533802		N	T	N	T	T	T	T	T	T	T	N	T	N	T	N	H	T	N	T	T	N	N	N	N	N	N	N	N	T	N	H	T	N	H	T	T	T	T	T	T	N	T
A05/B05	GM667	GA96	DX512271	135.905	Arahy.05	1.04015e+08		N	T	N	H	T	T	T	T	T	T	T	N	N	T	N	H	T	N	T	T	N	N	N	N	-	N	N	N	H	N	N	H	N	N	N	N	T	T	-	-	-	-
A05/B05	AX-147223487	AX-147223487_A05		147.071	Arahy.05	105891987		N	T	N	T	T	T	T	T	T	T	T	N	N	T	N	T	T	N	T	T	N	N	N	N	N	N	N	N	T	N	N	N	N	N	N	T	T	T	T	T	N	T
A05/B05	AX-147223501	AX-147223501_A05		147.419	Arahy.05	106203368		N	T	N	T	T	T	T	T	T	T	T	N	N	T	N	T	T	N	T	T	N	N	N	N	N	N	N	N	T	N	N	N	N	N	N	T	T	T	T	T	N	T
A05/B05	AX-147249675	AX-147249675_B05		154.011	Arahy.05	107835705		N	T	N	T	T	T	T	T	T	N	T	N	N	T	N	T	H	N	T	T	N	N	N	N	N	N	N	N	T	N	N	N	N	H	T	T	T	T	T	T	N	N
A05/B05	AX-147223559	AX-147223559_A05		162.364	Arahy.05	107422552		N	T	N	T	T	T	T	T	T	N	T	N	N	T	N	T	H	N	T	T	N	N	N	N	N	N	N	N	T	N	N	T	N	N	T	T	T	T	T	T	N	T
A05/B05	AX-147250285	AX-147250285_B05		162.695	Arahy.05	106822284		N	T	N	T	T	T	T	T	T	N	T	N	N	T	N	T	H	N	T	T	N	N	N	N	N	N	N	N	T	N	N	T	N	N	T	T	T	T	T	T	N	T
A05/B05	AX-147250275	AX-147250275_A05		162.859	Arahy.05	106912428		N	T	N	T	T	T	T	T	T	N	T	N	N	T	N	T	H	N	T	T	N	N	N	N	N	N	N	N	T	N	N	T	N	N	T	T	T	T	T	T	N	T
A05/B05	AX-147223536	AX-147223536_A05		163.697	Arahy.05	106936231		N	T	N	T	T	T	T	T	T	N	T	N	N	T	N	T	N	N	T	T	N	N	N	N	N	N	N	N	T	N	N	T	N	N	T	T	T	T	T	T	N	T
A05/B05	AX-147250315	AX-147250315_B05		166.153	Arahy.05	106407878		N	T	N	T	T	T	T	T	T	T	T	N	N	T	N	T	T	N	T	T	N	N	N	N	N	N	N	N	T	N	N	T	N	N	N	T	T	T	T	T	N	T
A05/B05	AX-147250307	AX-147250307_A05		167.838	Arahy.05	106586235		N	T	N	T	T	T	T	T	T	N	T	N	N	T	N	T	H	N	T	T	N	N	N	N	N	N	N	N	T	N	N	T	N	N	T	T	T	T	T	T	N	T
A05/B05	AX-147250281	AX-147250281_A05		168.37	Arahy.05	106843413		N	T	N	T	T	T	T	T	T	N	T	N	N	T	N	T	H	N	T	T	N	N	N	N	N	N	N	N	T	N	N	T	N	N	T	T	T	T	T	T	N	T
A05/B05	AX-147223615	AX-147223615_A05		171.017	Arahy.05	108403406		N	T	N	T	T	T	T	T	T	N	T	N	N	T	N	T	H	N	T	T	N	N	N	N	N	N	N	N	T	N	N	T	N	H	T	T	T	T	T	T	N	N
A05/B05	AX-147223684	AX-147223684_A05		176.141	Arahy.05	109766105		N	T	N	T	T	T	T	T	T	-	T	N	N	T	N	T	N	T	T	T	N	T	N	N	N	N	N	N	T	N	N	T	N	-	T	N	T	T	T	T	-	N
A05/B05	AX-147251183	AX-147251183_B05		179.598	Arahy.05	111937648		N	T	N	T	T	T	T	T	T	N	T	N	N	T	N	T	N	T	T	T	N	T	N	N	N	N	N	N	N	N	N	T	N	H	T	N	T	T	T	T	N	N
A05/B05	AX-147223822	AX-147223822_A05		184.911	Arahy.05	112516321		N	N	N	T	T	T	T	T	T	N	T	N	N	T	N	T	N	T	-	T	N	T	N	N	N	N	N	N	N	N	N	T	N	H	T	N	T	T	T	T	N	N
A05/B05	AX-147223812	AX-147223812_A05		186.638	Arahy.05	112444590		-	N	N	T	T	T	T	T	T	N	T	N	-	T	N	T	N	T	T	T	N	T	N	N	N	N	N	N	N	H	H	T	N	T	T	N	T	T	T	T	N	N
A05/B05	AX-147251244	AX-147251244_A05		190.67	Arahy.05	112986122		N	N	N	T	T	T	N	N	T	N	T	N	N	N	N	T	N	N	T	T	N	T	N	N	N	N	N	N	N	N	N	T	N	T	T	N	T	T	T	T	N	N
A05/B05	AX-147223878	AX-147223878_A05		194.262	Arahy.05	113289548		N	N	-	T	T	T	N	H	T	N	T	N	H	N	-	T	N	N	T	T	N	T	N	H	N	N	H	-	N	H	H	T	N	N	T	-	T	T	T	T	N	N
A05/B05	AX-147223898	AX-147223898_A05		198.748	Arahy.05	113732941		N	N	N	T	T	T	N	N	T	N	T	N	N	N	N	T	N	N	T	T	N	T	N	N	N	N	N	N	N	N	N	T	N	H	T	T	T	T	T	T	N	N
A05/B05	AX-147251361	AX-147251361_B05		200.837	Arahy.05	114573676		N	N	N	T	T	T	N	N	T	N	T	N	N	N	N	T	N	N	T	T	N	T	N	N	-	N	N	N	N	N	T	T	N	T	T	T	T	T	T	T	N	N
A05/B05	AX-147224040	AX-147224040_A05		204.868	Arahy.05	115622676		N	N	N	T	T	T	N	N	T	N	T	N	N	N	N	T	N	H	T	T	N	T	N	T	N	N	N	N	N	N	T	T	N	N	T	T	T	T	T	T	N	T
A05/B05	AX-147224036	AX-147224036_A05		206.052	Arahy.05	115555362		N	N	N	T	T	T	N	N	T	N	T	N	N	N	N	T	N	H	T	T	N	T	N	T	N	N	N	N	N	N	T	T	N	N	T	T	T	T	T	T	N	T
A05/B05	AX-147224048	AX-147224048_A05		206.35	Arahy.05	115757403		N	N	N	T	T	T	N	N	T	N	T	N	N	N	N	T	N	-	T	T	N	T	N	T	N	N	N	N	N	N	-	T	N	N	T	T	T	T	T	T	N	T
A05/B05	AX-147251484	AX-147251484_A05		206.55	Arahy.05	115809113		N	N	N	T	T	T	N	-	T	N	T	N	N	N	N	T	N	T	T	T	N	T	N	T	N	N	N	N	N	N	N	T	N	N	T	T	T	T	T	T	N	T
A05/B05	AX-147226112	AX-147226112_B02		207.194				-	N	N	T	T	T	N	N	T	N	T	N	N	N	N	T	N	T	T	T	N	T	N	T	N	N	N	N	N	N	-	T	N	N	T	T	T	T	T	T	N	T
A05/B05	AX-147224057	AX-147224057_A05		207.217				N	N	N	T	T	T	N	N	T	-	T	N	N	N	N	T	N	T	T	T	N	T	N	T	N	N	N	N	N	N	T	T	N	N	T	T	T	T	T	T	N	T
A05/B05	AX-147251487	AX-147251487_B05		208.227				N	N	-	T	T	T	-	N	T	N	T	N	N	N	N	T	N	T	T	T	N	T	N	T	N	N	N	T	N	N	-	T	N	N	T	T	T	T	T	T	N	T
A05/B05	AX-147224043	AX-147224043_A05		208.894	Arahy.05	115683869		N	N	N	T	T	T	N	N	T	N	T	N	N	N	N	T	N	T	T	T	N	T	N	T	N	N	N	N	N	N	T	T	N	N	T	T	T	T	T	T	N	T
A05/B05	AX-147251417	AX-147251417_B05		209.224	Arahy.05	115100160		N	N	N	T	T	T	N	N	T	N	T	N	N	N	N	T	N	T	T	T	N	T	N	T	N	N	N	N	N	N	T	T	N	N	T	T	T	T	T	T	N	T
A05/B05	AX-147224008	AX-147224008_A05		209.224	Arahy.05	115354967		N	N	N	T	T	T	N	N	T	N	T	N	N	N	N	T	N	-	T	T	N	T	N	T	N	N	N	N	N	N	T	T	N	N	T	T	T	T	T	T	N	T
A05/B05	AX-147251411	AX-147251411_A05		209.722	Arahy.05	115065557		N	N	N	T	T	T	N	N	T	N	T	N	N	N	N	T	N	T	T	T	N	T	N	N	N	N	N	N	N	N	T	T	N	N	T	T	T	T	T	T	N	T
A05/B05	AX-147223977	AX-147223977_A05		211.052	Arahy.05	115075756		N	N	N	T	T	T	N	N	T	H	T	N	N	N	N	T	N	-	T	T	N	T	N	N	N	N	N	N	N	N	T	T	N	N	T	T	T	T	T	T	N	T
A05/B05	AX-147223978	AX-147223978_A05		212.897	Arahy.05	115075909		N	N	N	T	T	T	N	N	T	N	T	N	N	N	N	T	N	N	T	T	N	T	N	N	N	N	N	N	N	N	T	T	N	N	T	T	T	T	T	T	N	T
A06	AX-147224097	AX-147224097_A06		0	Arahy.06	378053		N	T	T	T	N	T	N	N	N	N	T	N	T	N	T	T	T	N	T	H	N	N	N	N	N	N	N	T	T	N	T	T	T	N	T	T	N	N	T	T	N	N
A06	AX-147224092	AX-147224092_A06		0.593	Arahy.06	329563		N	T	T	T	N	T	N	N	N	N	T	N	T	N	T	T	T	N	T	H	N	N	N	N	N	N	N	T	T	N	T	T	T	N	T	T	N	N	T	T	N	N
A06	AX-147224109	AX-147224109_A06		1.592	Arahy.06	626947		N	T	T	T	N	T	N	N	N	N	T	N	T	N	T	T	T	N	T	H	N	N	N	N	N	N	N	T	T	N	T	T	T	N	T	T	N	N	T	T	N	N
A06	AX-147252580	AX-147252580_B06		8.223	Arahy.06	1329501		T	T	T	T	N	T	N	N	N	N	N	N	T	N	T	T	T	N	T	H	N	N	N	N	N	N	N	T	T	N	T	T	T	N	T	T	N	N	T	T	N	T
A06	AX-147252576	AX-147252576_A06		8.988	Arahy.06	1341825		T	T	T	T	N	T	N	N	N	N	N	N	T	N	T	T	T	N	T	N	N	N	N	N	N	N	N	T	T	N	T	T	T	N	T	T	N	N	T	T	N	T
A06	AX-147224166	AX-147224166_A06		9.981	Arahy.06	1329501		T	T	T	T	N	T	N	N	N	N	N	N	T	N	T	T	T	N	T	H	N	-	N	N	N	N	N	T	T	N	T	T	T	N	T	T	N	N	T	T	N	T
A06	GM1489	GM1489_a06	EZ733072	13.47	Arahy.06	1.34859e+06		T	T	T	T	N	T	N	N	H	H	N	N	T	H	T	T	T	N	T	H	N	N	N	N	N	N	H	T	T	N	T	T	T	H	T	T	N	N	T	T	N	T
A06	AX-147224198	AX-147224198_A06		19.13	Arahy.06	1569562		T	T	T	T	N	T	N	N	N	N	N	N	T	N	T	T	T	N	T	H	N	N	N	N	N	N	T	N	T	N	T	T	T	N	T	T	N	N	T	T	N	T
A06	AX-147224184	AX-147224184_A06		23.546	Arahy.06	1473567		T	T	T	T	N	T	N	N	N	N	N	N	-	N	T	T	T	N	T	-	N	N	N	N	N	N	T	N	T	N	T	T	T	N	T	T	N	N	T	T	N	T
A06	AX-147252542	AX-147252542_B06		23.917	Arahy.06	1540723		T	T	T	T	N	T	N	N	N	N	N	N	-	N	T	T	T	N	T	H	N	N	N	N	N	N	T	N	T	N	T	T	T	N	T	T	N	N	T	T	N	T
A06	AX-147224243	AX-147224243_A06		28.349	Arahy.06	2305661		T	T	T	T	N	T	N	N	N	N	N	N	T	N	T	T	T	N	T	N	T	N	N	N	N	N	T	N	T	N	T	T	T	N	T	T	N	N	T	T	N	T
A06	AX-147224318	AX-147224318_A06		33.486	Arahy.06	3554493		T	T	T	T	N	T	N	N	N	N	N	N	T	H	T	T	H	N	T	N	T	N	N	N	N	N	T	N	T	N	T	T	T	N	T	T	N	N	T	T	H	T
A06	AX-147252388	AX-147252388_B06		34.749	Arahy.06	3625857		T	T	T	T	N	T	N	N	N	N	N	N	T	H	T	T	H	N	T	N	T	N	N	N	N	N	T	N	T	N	T	N	T	N	T	T	N	N	T	T	T	T
A06	AX-147224310	AX-147224310_A06		37.141	Arahy.06	3454316		T	T	T	T	N	T	N	N	N	N	N	N	T	N	T	T	N	N	T	N	T	N	N	N	N	N	T	N	T	N	T	T	T	N	T	T	N	N	T	T	T	T
A06	AX-147252323	AX-147252323_B06		42.374	Arahy.06	4418806		T	T	T	T	N	T	N	N	N	N	N	N	T	T	T	T	H	N	T	N	T	N	N	N	N	N	T	N	T	T	N	T	N	N	T	T	N	N	T	T	H	T
A06	AX-147224395	AX-147224395_A06		42.561	Arahy.06	4536170		T	T	T	T	N	T	N	N	N	N	N	N	T	T	T	T	H	N	T	N	T	N	N	N	N	N	T	N	T	T	N	T	N	N	T	T	N	N	T	T	H	T
A06	AX-147224402	AX-147224402_A06		43.326	Arahy.06	4575842		T	T	T	T	N	T	N	N	T	N	N	N	T	T	T	T	N	N	T	N	T	N	N	N	N	N	T	N	T	T	N	T	N	N	T	T	N	N	T	T	-	T
A06	AX-147224431	AX-147224431_A06		45.169	Arahy.06	4928452		T	T	T	T	N	T	H	N	T	N	N	N	T	T	T	T	H	N	T	N	T	N	N	N	N	N	T	N	T	T	N	T	N	N	T	T	N	T	T	T	H	T
A06	AX-147224423	AX-147224423_A06		45.841	Arahy.06	4915363		T	T	T	T	N	T	N	N	T	N	N	N	T	T	T	T	T	N	T	N	T	N	N	N	N	N	T	N	T	T	N	T	N	N	T	T	N	T	T	T	H	T
A06	AX-147224451	AX-147224451_A06		50.932	Arahy.06	5196917		H	T	H	T	N	T	N	N	T	N	N	N	T	T	T	T	T	N	T	N	T	T	N	N	N	N	T	N	T	T	N	T	N	N	T	T	N	T	T	T	H	T
A06	AX-147224455	AX-147224455_A06		51.263	Arahy.06	5257866		H	T	H	T	N	T	N	N	T	N	N	N	T	T	T	T	T	N	T	N	T	T	N	N	N	N	T	N	T	T	N	T	N	N	T	T	N	T	T	T	H	T
A06	AX-147252241	AX-147252241_B06		52.494	Arahy.06	5413093		H	T	H	T	N	T	N	N	T	N	N	N	T	T	T	T	T	N	T	N	T	T	N	N	N	N	T	N	T	T	N	T	N	N	T	T	H	T	T	T	H	T
A06	AX-147252147	AX-147252147_A06		59.005	Arahy.06	6459797		H	T	T	T	N	H	H	H	T	N	N	N	T	T	T	T	T	N	T	N	N	T	N	N	N	N	T	N	T	T	N	T	N	N	T	T	N	T	T	T	H	T
A06	AX-147224590	AX-147224590_A06		62.056	Arahy.06	7238647		H	T	T	T	N	H	T	T	T	N	N	N	T	T	T	H	T	N	T	N	N	T	N	N	N	N	T	N	T	T	N	T	N	N	H	T	H	T	T	T	H	T
A06	AX-147224611	AX-147224611_A06		65.921	Arahy.06	7561216		H	T	T	T	N	H	T	T	T	N	N	N	T	T	T	H	T	N	T	N	N	T	N	N	N	T	T	N	T	T	N	-	N	T	T	T	N	T	T	T	N	T
A06	AX-147252093	AX-147252093_B06		66.59	Arahy.06	7609132		H	T	T	T	N	-	T	T	T	N	N	N	T	T	T	T	T	N	T	N	N	T	N	N	N	T	T	N	T	T	N	T	N	T	T	T	H	T	T	T	N	T
A06	AX-147252076	AX-147252076_A06		67.604	Arahy.06	7954699		H	T	T	T	N	H	T	T	T	N	N	N	T	T	T	T	T	N	T	N	N	T	N	N	N	T	T	N	T	T	N	T	N	T	T	T	H	T	T	T	N	T
A06	AX-147224640	AX-147224640_A06		68.614	Arahy.06	7880152		N	T	T	T	N	T	T	T	T	N	N	N	T	T	T	T	T	N	T	N	N	T	N	N	N	T	T	N	T	T	N	T	N	T	T	T	N	T	T	T	N	T
A06	AX-147224715	AX-147224715_A06		72.043	Arahy.06	9689952		H	T	T	T	N	T	T	T	T	N	N	N	T	T	T	T	T	N	T	N	N	T	N	N	T	T	T	N	T	T	N	T	N	T	T	T	N	T	T	T	N	T
A06	GM544	pPGSseq15D3		74.137	Arahy.06	10467925		-	T	T	T	N	T	T	H	T	N	N	N	T	T	T	T	T	N	T	T	N	T	N	N	T	T	T	N	T	T	N	T	N	T	T	T	N	-	T	T	N	-
A06	GM377	PM35		76.683	Arahy.06	1.09788e+07		-	T	T	T	N	T	T	T	T	N	N	N	T	T	T	T	-	-	T	T	N	T	N	T	-	T	T	N	T	T	N	T	N	T	T	T	N	-	T	N	-	-
A06	AX-147224825	AX-147224825_A06		77.995	Arahy.06	11410879		H	T	T	T	N	T	T	T	T	N	N	N	T	T	T	T	T	N	T	T	N	T	N	T	T	T	T	N	T	T	N	T	N	T	T	T	N	T	T	N	N	T
A06	AX-147251862	AX-147251862_B06		81.635	Arahy.06	11966559		H	T	T	T	N	T	T	T	T	N	N	N	T	T	T	H	T	N	T	T	N	T	N	T	T	T	T	N	T	T	N	-	N	T	T	T	N	T	T	N	N	T
A06	AX-147251741	AX-147251741_A06		85.671	Arahy.06	13963583		N	T	T	T	N	T	T	T	T	N	N	N	T	T	T	T	N	N	T	T	N	T	N	T	T	T	T	N	T	T	N	T	N	T	T	T	N	T	T	N	N	T
A06	AX-147225087	AX-147225087_A06		89.492	Arahy.06	17639773		N	T	T	T	N	T	T	T	T	N	N	N	T	T	T	T	N	N	T	T	N	T	N	T	T	T	T	N	T	T	N	T	N	T	T	T	N	T	T	N	N	T
A06	AX-147251640	AX-147251640_B06		90.506	Arahy.06	17260817		N	T	T	T	N	T	T	T	T	N	N	N	T	T	T	T	N	N	T	T	N	T	N	T	T	T	T	N	T	T	N	T	N	T	T	T	N	T	T	N	-	T
A06	AX-147225135	AX-147225135_A06		91.872	Arahy.06	19164153		N	T	T	T	N	T	T	T	T	N	N	N	T	T	T	T	N	N	T	T	T	T	N	T	T	T	T	N	T	T	N	T	N	T	T	T	N	T	T	N	N	T
A06	AX-147225136	AX-147225136_A06		92.71	Arahy.06	19166641		N	T	T	T	N	T	T	T	T	N	T	N	T	T	T	T	N	N	T	T	T	T	N	T	T	T	T	N	T	T	N	T	N	T	T	T	N	T	T	N	N	T
A06	AX-147225214	AX-147225214_A06		94.402	Arahy.06	21242928		N	T	T	T	N	T	T	T	T	-	N	N	T	T	T	T	N	N	T	T	T	T	N	T	T	T	T	N	T	T	N	T	N	T	T	T	N	T	T	N	N	T
A06	AX-147225269	AX-147225269_A06		95.444	Arahy.06	25207447		N	T	T	T	N	T	T	T	T	N	N	N	T	T	T	T	N	N	T	T	T	T	N	T	T	T	T	N	T	T	N	T	N	T	T	T	-	T	T	N	N	T
A06	AX-147225275	AX-147225275_A06		95.829	Arahy.06	25746818		N	T	T	T	N	T	T	T	T	N	N	N	T	T	T	T	N	-	T	T	T	T	N	T	T	T	T	N	T	T	N	T	N	T	T	T	N	T	T	N	N	T
A06	AX-147252760	AX-147252760_A04		96.337	Arahy.06	25749011		N	T	T	T	N	T	T	T	T	N	N	N	T	T	T	T	N	N	T	T	T	T	N	T	T	T	T	N	T	T	N	T	N	T	T	T	N	T	T	N	N	T
A06	AX-147225264	AX-147225264_B06		96.605	Arahy.06	25233803		N	T	T	T	N	T	T	T	T	N	N	N	T	T	T	T	N	N	T	T	T	T	N	T	T	T	T	N	T	T	N	T	N	T	T	T	N	T	T	N	N	T
A06	AX-147252753	AX-147252753_B06		96.774	Arahy.06	25213697		N	T	T	T	N	T	T	T	T	N	N	N	T	T	T	T	N	N	T	T	T	T	N	T	T	T	T	N	T	T	N	T	N	T	T	T	H	T	T	N	N	T
A06	AX-147225276	AX-147225276_A06		97.347	Arahy.06	25746990		N	T	T	T	N	T	T	T	T	N	N	N	T	T	T	T	N	N	T	T	T	T	N	T	T	T	T	N	T	T	N	H	N	T	T	T	N	T	T	N	N	T
A06	AX-147252698	AX-147252698_A06		97.903	Arahy.06	22085930		N	T	T	T	N	T	T	T	T	N	N	N	T	T	T	T	N	N	T	T	T	T	N	T	T	T	T	N	T	T	N	T	N	-	T	T	N	T	T	N	N	T
A06	AX-147225272	AX-147225272_A06		99.249				N	T	T	T	-	T	T	T	T	N	-	N	T	T	T	T	N	N	T	T	T	T	N	T	T	T	T	N	T	T	N	T	N	T	T	T	N	T	T	N	N	T
A06	AX-147225340	AX-147225340_A06		101.266	Arahy.06	52258597		N	T	T	T	N	T	T	T	-	N	N	N	T	T	T	-	N	N	T	T	T	T	N	T	T	T	T	-	-	-	N	T	N	T	-	T	N	T	T	N	N	T
A06	AX-147225540	AX-147225540_A06		102.097	Arahy.06	79727179		N	T	T	T	N	T	T	T	T	N	N	N	T	T	T	T	N	N	T	T	T	T	N	N	T	T	T	N	T	T	N	T	N	T	T	T	-	T	T	N	N	T
A06	AX-147225357	AX-147225357_A06		102.935	Arahy.06	32932913		N	T	T	T	N	T	T	T	T	N	N	N	T	T	T	T	N	N	T	T	T	T	N	T	T	T	T	N	T	T	N	T	N	T	T	T	N	T	T	N	N	T
A06	AX-147225518	AX-147225518_A06		103.945	Arahy.06	77657147		N	T	T	T	N	T	T	T	T	N	N	N	T	T	T	T	N	N	T	T	T	T	N	T	T	T	T	N	T	T	N	T	N	T	T	T	N	T	T	N	N	T
A06	AX-147225511	AX-147225511_A06		104.612	Arahy.06	76264362		N	T	T	T	N	T	T	T	T	N	N	N	T	T	T	T	N	N	T	T	T	T	N	T	T	T	T	N	T	T	N	T	N	T	T	T	N	T	T	N	N	T
A06	AX-147225526	AX-147225526_A06		105.625	Arahy.06	78598668		N	T	T	T	N	T	T	T	T	N	N	N	T	T	T	T	N	N	T	T	T	T	N	N	T	T	T	N	T	T	N	T	N	T	T	T	N	T	T	N	N	T
A06	AX-147225674	AX-147225674_A06		106.466	Arahy.06	84183941		N	T	T	T	N	T	T	T	T	N	N	N	T	T	T	T	N	N	T	T	T	T	N	N	T	T	T	N	T	T	N	T	N	T	T	T	N	T	T	N	N	T
A06	AX-147253042	AX-147253042_A06		107.556	Arahy.06	85221733		N	T	T	T	N	T	T	T	T	N	N	N	T	T	T	T	N	N	T	T	T	N	N	N	T	T	T	N	T	T	N	T	N	T	T	T	N	T	T	N	N	T
A06	AX-147225615	AX-147225615_A06		109.019				N	T	T	T	N	T	T	T	T	N	N	N	T	T	T	T	N	N	T	T	T	N	N	N	T	T	T	N	T	T	N	N	N	T	T	T	N	T	T	N	N	T
A06	AX-147225642	AX-147225642_A06		109.857	Arahy.06	85975620		N	T	T	T	N	T	T	T	T	N	N	N	T	T	T	T	N	N	T	T	T	N	N	N	T	T	T	N	T	T	N	N	N	T	T	T	N	T	T	N	N	T
A06	AX-147253074	AX-147253074_A06		111.045	Arahy.06	87828964		N	T	T	T	N	T	T	T	T	N	N	N	T	T	T	T	N	N	T	T	T	N	N	N	T	T	T	N	T	T	N	T	N	T	T	T	N	T	T	N	N	T
A06	AX-147225725	AX-147225725_A06		112.773	Arahy.06	91071492		N	T	T	T	N	T	T	T	T	N	N	N	H	T	T	T	N	N	T	T	T	N	N	N	T	T	T	N	H	T	N	T	N	T	T	T	N	T	T	N	N	T
A06	AX-147253214	AX-147253214_B06		114.68	Arahy.06	94612554		N	T	T	T	N	T	T	T	T	N	N	N	T	T	T	T	N	N	T	T	T	N	N	N	T	T	T	N	T	T	N	T	N	T	T	T	N	T	T	N	N	T
A06	AX-147253249	AX-147253249_B06		117.922	Arahy.06	97356187		N	T	T	T	N	T	T	T	T	N	N	N	T	T	T	T	N	N	T	T	T	N	T	N	T	T	T	N	T	T	N	N	N	T	T	T	N	N	T	N	N	T
A06	AX-147225870	AX-147225870_A06		121.358	Arahy.06	99440691		N	T	T	T	N	T	T	T	T	N	N	N	T	T	T	T	N	N	T	T	T	N	T	N	T	T	T	N	T	T	N	T	N	T	T	T	N	T	T	T	N	T
A06	AX-147225924	AX-147225924_A06		124.804	Arahy.06	102927153		N	T	T	T	N	T	T	N	T	N	N	N	T	T	T	H	N	N	T	T	T	N	T	N	T	T	T	N	T	T	N	T	N	T	T	T	N	T	T	T	N	T
A06	AX-147225926	AX-147225926_A06		125.99	Arahy.06	102959951		N	T	T	T	N	T	T	N	T	N	N	N	T	T	T	H	N	N	T	T	T	N	T	N	T	T	T	N	T	T	N	N	N	T	T	T	N	T	T	T	N	T
A06	GM2	Ah1TC1A01		128.734	Arahy.06	1.03475e+08		N	T	T	T	N	T	T	N	T	N	N	N	T	T	T	H	N	N	T	T	T	N	T	N	-	T	T	N	T	T	N	N	N	T	T	T	N	-	T	-	-	T
A06	AX-147225994	AX-147225994_A06		131.053	Arahy.06	103984841		N	T	T	T	N	T	T	N	T	N	N	N	T	T	T	T	N	N	T	T	T	N	T	N	T	T	T	N	T	T	N	N	N	T	T	T	N	-	T	T	T	T
A06	AX-147253519	AX-147253519_A06		133.807	Arahy.06	105043555		N	T	T	N	N	T	T	N	T	N	N	N	T	T	T	-	N	N	T	T	T	N	T	N	T	T	T	N	T	T	N	N	T	T	T	T	N	H	T	T	T	T
A06	AX-147253515	AX-147253515_A06		134.542	Arahy.06	105015188		N	T	T	N	N	T	T	N	T	N	N	N	T	T	T	H	N	N	T	T	T	N	T	N	T	T	T	N	T	T	N	N	T	T	T	T	N	H	N	T	T	T
A06	AX-147226053	AX-147226053_A06		137.357	Arahy.06	105681083		N	T	T	N	N	T	T	N	T	H	N	N	T	T	T	H	N	N	T	T	T	N	T	N	T	T	T	N	T	T	N	N	T	T	T	T	N	H	T	T	T	T
A06	AX-147253551	AX-147253551_B06		137.719	Arahy.06	105616645		N	T	T	N	N	T	T	N	T	N	N	N	T	T	T	H	N	N	T	T	T	N	T	N	T	T	T	N	T	T	N	N	T	T	T	T	N	H	T	T	T	T
A06	AX-147253598	AX-147253598_A06		140.524	Arahy.06	106315446		N	T	T	N	N	T	T	N	H	N	N	N	T	T	T	N	N	N	-	T	T	N	T	N	T	T	T	N	T	T	N	N	T	T	T	T	N	H	T	T	T	T
A06	AX-147226087	AX-147226087_A06		141.786	Arahy.06	106389918		-	T	T	N	-	T	T	N	T	-	N	N	T	T	T	-	N	N	T	T	T	N	T	N	T	T	T	N	T	T	N	N	T	T	T	T	N	H	T	T	T	T
A06	AX-147226149	AX-147226149_A06		145.704	Arahy.06	107791049		N	T	T	N	N	T	T	N	T	-	N	N	T	T	T	T	N	N	T	T	T	N	T	N	T	T	T	N	T	T	T	N	T	T	T	T	N	H	T	T	T	T
A07	AX-147227343	AX-147227343_A07		0	Arahy.07	3934826		N	N	T	N	N	N	T	T	T	N	T	N	N	T	T	T	N	T	T	N	N	N	T	T	N	T	N	T	T	T	T	T	T	N	T	T	T	N	N	T	T	T
A07	AX-147227450	AX-147227450_A07		15.563	Arahy.07	5094862		N	N	T	N	N	N	T	T	T	N	N	N	N	T	T	N	N	N	N	N	N	N	T	T	N	T	T	T	-	T	T	N	T	N	N	T	T	N	N	T	T	T
A07	AX-147254788	AX-147254788_A07		15.905	Arahy.07	5353444		N	N	T	N	N	N	T	T	T	N	N	N	N	T	T	N	N	N	N	N	N	N	T	T	N	T	T	T	N	T	T	-	T	N	N	T	T	N	N	T	T	T
A07	AX-147254786	AX-147254786_A07		16.405	Arahy.07	5315162		N	N	T	N	N	N	T	T	-	N	N	N	N	H	T	N	N	N	N	N	N	N	T	T	N	T	T	T	N	T	T	N	T	N	N	T	T	N	N	T	T	T
A07	AX-147254739	AX-147254739_B07		17.072				N	N	T	N	N	N	T	T	T	N	N	N	N	T	T	N	N	N	N	N	N	N	T	T	N	T	T	T	N	T	T	N	T	N	N	T	T	N	N	T	T	T
A07	AX-147254740	AX-147254740_A07		17.236	Arahy.07	5628110		N	N	T	N	N	N	T	T	T	N	N	N	N	T	T	N	N	N	N	N	N	N	T	T	N	T	T	T	N	T	T	N	T	N	N	T	T	N	N	T	T	T
A07	AX-147254843	AX-147254843_B07		18.074	Arahy.07	6005575		N	N	T	N	N	N	T	T	T	N	N	N	N	T	T	N	N	N	N	N	N	N	T	T	N	T	T	T	N	T	T	N	T	N	N	T	T	N	N	N	T	T
A07	AX-147227582	AX-147227582_A07		20.157	Arahy.07	7360145		N	N	T	N	N	N	T	T	T	N	N	N	T	T	T	N	N	N	N	N	T	N	T	T	N	T	T	T	N	T	T	N	T	N	N	T	T	N	N	N	T	T
A07	AX-147254879	AX-147254879_B07		20.824				N	N	T	N	N	N	T	T	T	N	N	N	T	-	T	N	N	N	N	N	T	N	T	T	N	T	T	T	N	T	T	N	T	N	N	T	T	N	N	N	T	T
A07	AX-147227588	AX-147227588_A07		22.877	Arahy.07	7585721		N	N	T	N	N	N	T	T	T	N	N	N	T	T	T	N	N	N	N	N	T	N	T	T	N	T	T	T	N	T	T	-	T	N	N	T	T	N	N	N	T	T
A07	AX-147227587	AX-147227587_A07		24.328	Arahy.07	7569343		N	N	T	N	N	N	T	T	T	N	N	N	T	T	T	T	N	N	N	N	T	N	T	T	N	T	T	T	N	T	T	T	T	N	N	T	T	N	N	N	T	T
A07	AX-147254914	AX-147254914_A07		28.384	Arahy.07	8191442		N	N	T	N	N	N	T	T	T	N	-	N	T	T	T	T	-	N	N	N	T	N	T	T	N	T	T	T	N	T	T	T	T	N	N	T	T	N	N	N	T	T
A07	AX-147254895	AX-147254895_B07		30.096	Arahy.07	7877440		N	N	T	N	N	N	T	T	T	N	N	N	T	T	T	H	N	N	N	N	T	N	T	T	N	T	T	T	N	T	H	T	T	N	N	T	H	N	N	N	T	T
A07	AX-147227613	AX-147227613_A07		30.439	Arahy.07	8065369		N	N	T	N	N	N	T	T	T	N	N	N	T	T	T	H	N	N	N	N	T	N	T	T	N	T	T	T	N	T	T	T	T	N	N	T	T	N	N	N	T	T
A07	AX-147227654	AX-147227654_A07		31.449	Arahy.07	9088282		N	N	T	N	N	N	T	T	T	N	N	N	T	T	T	H	N	N	N	N	T	N	T	T	N	T	T	T	N	T	T	T	T	N	N	T	T	N	N	N	T	T
A07	AX-147254978	AX-147254978_A07		33.837	Arahy.07	10015757		N	N	T	N	-	N	T	T	T	N	N	N	T	T	T	T	N	N	N	N	N	N	T	T	N	T	T	T	N	T	T	T	T	N	N	T	T	N	H	N	T	T
A07	AX-147254958	AX-147254958_B07		35.267				N	N	T	N	N	N	T	T	T	N	N	N	T	T	T	T	N	N	N	N	N	N	T	T	N	T	T	T	N	T	T	T	T	N	N	T	T	N	N	N	T	T
A07	AX-147254953	AX-147254953_A07		35.432				N	N	T	N	N	N	T	T	T	N	N	N	T	T	T	-	N	N	N	N	N	N	T	T	N	T	T	T	N	T	T	H	T	N	N	T	T	N	N	N	T	T
A07	AX-147254954	AX-147254954_B07		35.596	Arahy.07	9587791		N	N	T	N	N	N	T	T	T	N	N	N	T	T	T	T	N	N	N	N	N	N	T	T	N	T	T	T	N	T	T	T	T	N	N	T	T	N	N	N	T	T
A07	AX-147254948	AX-147254948_B07		35.598	Arahy.07	9294693		N	N	T	N	N	N	T	T	T	N	N	N	T	T	T	T	N	N	N	N	N	N	T	T	N	T	T	T	N	T	T	T	T	N	N	T	T	N	N	N	T	T
A07	AX-147254959	AX-147254959_B07		36.095	Arahy.07	9588493		N	N	T	N	N	N	T	T	T	N	N	N	T	T	T	T	N	N	N	N	N	N	T	T	N	T	T	T	N	T	T	T	T	N	N	T	T	N	N	N	T	T
A07	AX-147255042	AX-147255042_A07		39.13	Arahy.07	11433276		N	N	T	T	N	N	T	T	T	N	N	N	T	T	T	T	N	N	N	N	N	N	T	T	N	T	T	T	N	T	T	-	T	N	N	T	T	N	N	N	T	T
A07	AX-147227736	AX-147227736_A07		40.145	Arahy.07	11526873		N	N	T	T	N	N	T	T	T	N	N	N	T	T	T	T	N	N	N	N	N	N	T	T	N	T	T	T	N	T	T	T	T	N	N	T	T	N	N	N	T	T
A07	AX-147227740	AX-147227740_A07		41.334	Arahy.07	11657911		N	N	T	T	N	N	T	T	T	N	N	N	T	T	T	T	N	N	N	N	N	N	T	T	N	T	T	T	N	T	T	-	T	N	N	T	T	N	N	N	T	T
A07	AX-147227779	AX-147227779_A07		46.201	Arahy.07	12739168		N	N	T	T	-	N	T	T	T	N	N	N	T	T	T	T	T	N	-	N	N	N	T	T	N	T	T	T	N	T	T	T	T	N	N	T	T	N	N	N	T	T
A07	AX-147255148	AX-147255148_A07		47.387				N	N	T	T	N	N	T	T	T	N	N	N	T	T	T	T	T	N	N	N	N	N	T	T	N	T	T	T	N	T	T	T	T	N	N	T	T	N	N	N	T	T
A07	AX-147227842	AX-147227842_A07		48.482	Arahy.07	14249355		N	-	T	T	N	N	T	T	T	-	N	N	T	T	T	T	T	N	N	N	N	N	T	T	N	T	T	T	-	T	T	T	T	N	N	T	T	N	-	-	T	T
A07	AX-147227844	AX-147227844_A07		49.953	Arahy.07	14398932		N	N	T	T	N	N	T	T	T	N	N	N	T	T	T	T	T	N	N	N	N	N	T	T	N	T	T	T	N	T	T	T	T	N	N	T	T	N	N	N	T	T
A07	AX-147227829	AX-147227829_A07		50.621	Arahy.07	13837856		N	N	T	T	N	N	T	T	T	N	N	N	T	T	T	T	T	N	N	N	N	N	T	T	N	T	T	T	N	T	T	-	T	N	N	T	T	N	N	N	T	T
A07	AX-147227868	AX-147227868_A07		52.152	Arahy.07	14897977		-	N	T	T	N	-	T	T	T	N	N	N	T	T	T	T	T	N	N	N	N	N	T	T	N	N	N	T	N	T	T	T	T	N	-	T	T	N	N	N	T	T
A07	GM1076b	GM1076b_a07-b07	GO325499.1	54.265				-	N	T	T	N	N	T	T	T	N	N	N	T	T	T	T	T	-	N	N	N	N	T	T	-	N	N	T	T	T	T	T	T	N	N	T	T	-	N	N	-	T
A07	AX-147227959	AX-147227959_A07		55.197	Arahy.07	18448400		N	N	T	T	N	N	T	T	T	N	N	N	T	T	T	-	T	N	N	N	N	N	T	T	N	N	N	T	T	T	T	T	T	N	-	T	T	N	N	N	T	T
A07	AX-147244399	AX-147244399_A02		55.923	Arahy.07	21008735		N	N	T	T	N	N	T	T	H	N	N	N	T	T	T	T	T	N	N	N	N	N	T	T	N	N	N	T	T	T	T	T	T	N	N	T	T	N	N	N	T	T
A07	AX-147228029	AX-147228029_A07		56.279				N	N	T	T	N	N	T	T	N	N	N	N	T	T	T	T	T	N	N	N	N	N	T	T	N	N	N	T	T	T	T	T	T	N	N	T	T	N	N	N	T	T
A07	AX-147255230	AX-147255230_A01		56.279				N	N	T	T	N	N	T	T	N	N	N	N	T	T	T	T	T	N	N	N	N	N	T	T	N	N	N	T	T	T	T	T	T	N	N	T	T	N	N	N	T	T
A07	AX-147228147	AX-147228147_A07		56.946	Arahy.07	24855592		N	N	T	T	N	N	T	T	N	N	N	N	T	T	T	T	T	N	N	N	N	N	T	T	N	N	N	T	T	T	T	T	T	N	N	T	T	N	N	N	T	T
A07	AX-147228002	AX-147228002_A07		57.277	Arahy.07	20127887		N	N	T	T	N	N	T	T	N	N	N	N	T	T	T	T	T	N	N	N	N	N	T	T	N	N	N	T	T	T	T	T	T	N	N	T	T	N	N	N	T	T
A07	AX-147228138	AX-147228138_A07		57.609	Arahy.07	25216033		N	N	-	-	N	N	T	-	N	N	N	N	T	-	-	-	T	N	N	N	N	N	T	-	T	N	N	-	-	T	T	T	-	N	N	-	-	N	N	N	T	-
A07	AX-147228228	AX-147228228_A07		58.445	Arahy.07	32117646		N	N	T	T	N	N	T	T	N	N	N	N	T	T	T	T	T	N	N	N	N	N	T	T	-	N	N	T	T	T	T	T	T	N	N	T	T	N	N	N	T	T
A07	AX-147255347	AX-147255347_A07		59.273	Arahy.07	21363814		N	N	T	T	N	N	T	T	N	N	N	N	-	T	-	T	-	N	N	N	N	N	T	T	N	N	N	T	T	T	T	T	T	N	N	T	T	N	N	-	T	T
A07	AX-147228030	AX-147228030_A07		59.721				N	N	T	T	N	N	T	T	N	N	N	N	T	T	T	T	T	N	N	N	N	N	T	T	N	N	N	T	T	T	T	H	T	N	N	T	T	N	N	N	T	T
A07	AX-147228017	AX-147228017_A07		59.949	Arahy.07	20808064		N	N	T	T	N	N	T	T	N	N	-	N	T	T	T	T	T	N	N	N	N	-	T	T	N	N	N	T	T	T	T	T	T	N	N	T	T	N	N	N	T	T
A07	AX-147228083	AX-147228083_A07		60.114	Arahy.07	28602363		N	N	T	T	N	N	T	T	N	N	N	N	T	T	T	T	T	N	N	N	N	N	T	T	N	N	N	T	T	T	T	T	T	N	N	T	T	N	N	N	T	T
A07	AX-147228323	AX-147228323_A07		60.114	Arahy.07	30004653		N	N	T	T	N	N	T	T	N	N	N	N	T	T	T	T	T	N	N	N	N	N	T	T	N	N	N	T	T	T	T	T	T	N	N	T	T	N	N	N	T	T
A07	AX-147255471	AX-147255471_B07		60.114	Arahy.07	25216273		N	N	T	T	N	N	T	T	N	N	N	N	T	T	T	T	T	N	N	N	N	N	T	T	N	N	N	T	T	T	T	T	T	N	-	T	T	N	N	N	T	T
A07	AX-147227989	AX-147227989_A07		60.114	Arahy.07	19885277		N	N	T	T	N	N	T	T	N	N	N	N	T	T	T	T	T	N	N	N	N	N	T	T	N	N	N	T	T	T	T	T	T	N	N	T	T	N	N	N	T	T
A07	AX-147228048	AX-147228048_A07		60.278	Arahy.07	21541712		N	N	T	T	N	N	T	T	N	N	N	N	T	T	T	T	T	N	N	N	N	N	T	T	N	N	N	T	T	T	T	T	T	N	N	T	T	N	N	N	T	T
A07	GM437	pPGPseq3A1		60.945	Arahy.07	25008200		N	N	T	T	N	N	T	T	N	N	N	N	T	T	T	T	T	N	N	N	N	N	T	T	N	N	N	T	T	T	T	T	T	N	N	T	T	T	N	N	T	T
A07	AX-147228081	AX-147228081_A07		63.068	Arahy.07	22300059		N	N	T	T	N	N	H	T	N	N	N	N	-	T	T	T	T	N	N	N	N	N	T	T	N	N	N	-	T	H	T	-	T	N	N	T	T	N	N	N	T	T
A07	GM405	PM204		65.903	Arahy.07	3.32031e+07		N	N	T	T	N	N	T	T	N	N	N	N	T	T	T	T	T	N	N	N	N	N	T	T	-	N	N	T	T	T	T	N	T	N	N	T	H	N	N	N	T	T
A07	GM89	Ah2TC9H08		67.627	Arahy.07	41468063		-	N	T	T	N	N	T	T	N	N	N	N	T	T	T	T	-	-	N	N	N	N	T	T	-	N	N	T	T	T	T	N	T	N	N	T	T	-	-	N	N	T
A07	AX-147228320	AX-147228320_A07		68.47	Arahy.07	40500725		N	N	T	T	N	N	T	T	N	N	N	N	T	T	T	T	T	N	N	N	N	N	T	T	N	N	N	T	T	T	T	N	T	N	N	T	T	N	N	N	T	T
A07	AX-147228341	AX-147228341_A07		68.634	Arahy.07	42398155		N	N	T	T	N	N	T	T	N	N	N	N	T	T	T	T	T	N	N	N	N	N	T	T	N	N	N	T	T	-	T	N	T	N	N	T	T	N	N	N	T	T
A07	AX-147228329	AX-147228329_A07		68.84	Arahy.07	42007958		N	N	T	T	N	N	T	T	N	N	N	N	T	T	T	T	T	N	N	N	N	N	T	T	N	N	N	T	T	T	T	N	T	N	N	T	-	N	N	N	T	T
A07	AX-147258676	AX-147258676_A07		69.464				N	N	T	T	N	N	T	T	N	N	N	N	T	T	T	T	T	N	N	N	N	N	T	T	N	N	N	T	T	T	T	N	T	N	N	T	H	N	N	N	T	T
A07	AX-147258684	AX-147258684_A07		69.629				N	N	T	T	N	N	T	T	N	N	N	N	T	T	T	T	T	N	N	N	N	N	T	T	N	N	N	T	T	T	T	N	T	N	N	T	T	N	N	N	T	T
A07	AX-147228418	AX-147228418_A07		70.64				N	N	T	T	N	N	-	T	N	N	N	N	T	T	T	N	T	N	N	N	N	N	T	T	N	N	N	T	T	T	N	N	-	N	N	T	T	N	N	N	T	T
A07	AX-147228434	AX-147228434_A07		71.651	Arahy.07	51643493		N	N	T	T	N	N	T	T	N	N	N	N	T	T	T	T	T	N	N	N	N	N	T	T	N	N	N	T	T	T	T	N	T	N	N	T	T	N	N	N	T	T
A07	AX-147258677	AX-147258677_B08		71.651				N	N	T	T	-	N	T	T	N	N	N	N	T	T	T	T	T	N	N	N	N	N	T	T	N	N	N	T	T	T	T	-	T	-	N	T	T	N	N	-	T	T
A07	AX-147228421	AX-147228421_A07		71.651				N	N	T	T	N	N	T	T	N	N	N	N	T	T	T	T	T	N	N	N	N	N	T	T	N	N	N	T	T	T	T	N	T	N	N	T	T	N	N	N	T	T
A07	AX-147258683	AX-147258683_A07		71.982				N	N	T	T	N	N	T	T	N	N	N	N	T	T	T	T	T	N	N	N	N	N	T	T	N	N	N	T	T	T	T	N	T	N	N	T	T	N	N	N	T	T
A07	AX-147258680	AX-147258680_A07		73.15				N	N	T	T	N	N	T	T	N	N	N	N	T	T	T	T	T	N	T	N	N	N	T	T	-	-	N	T	T	T	T	N	T	N	N	T	T	N	N	N	T	T
A07	AX-147228419	AX-147228419_B08		74.696				N	N	T	T	N	N	T	T	N	N	N	N	T	T	T	T	T	N	N	N	N	N	T	T	N	N	N	T	T	T	T	N	T	N	N	T	T	N	N	N	T	T
A07	AX-147228349	AX-147228349_A07		74.724	Arahy.07	50521784		N	N	T	T	N	N	T	T	N	N	N	N	T	T	T	T	T	N	N	N	N	N	T	T	N	N	N	T	T	T	-	N	T	N	N	T	T	N	N	N	T	T
A07	GM1937	GM1937_a07	EZ744419	75.247				-	N	T	T	N	N	T	T	N	N	N	N	T	T	T	T	-	N	N	N	N	N	T	T	N	N	N	T	T	T	T	N	T	N	N	T	T	N	N	N	T	T
A07	AX-147255751	AX-147255751_A07		78.823	Arahy.07	56620104		N	N	T	T	N	N	T	T	N	T	N	N	T	T	T	T	T	N	N	N	N	N	T	T	N	N	T	T	T	T	T	T	T	N	N	T	T	N	N	N	T	T
A07	AX-147263130	AX-147263130_B10		79.153	Arahy.07	56624716		N	N	T	T	-	N	T	T	N	T	N	N	T	T	T	T	T	N	N	N	N	N	T	T	N	N	T	T	T	T	T	T	T	N	N	T	T	N	N	N	T	T
A07	AX-147255750	AX-147255750_A07		81.398	Arahy.07	56620360		H	N	T	T	N	N	T	T	H	T	N	N	T	T	T	T	T	H	N	H	N	N	T	T	N	N	T	T	T	T	T	T	T	N	H	T	T	N	N	N	T	T
A07	AX-147228544	AX-147228544_A07		84.11	Arahy.07	56619697		-	N	T	T	N	-	T	T	N	T	N	N	T	T	T	T	T	N	N	-	-	N	T	T	N	N	T	T	T	T	T	T	T	N	N	T	T	-	N	N	T	N
A07	AX-147245969	AX-147245969_B03		93.129	Arahy.07	72913929		N	N	T	T	N	N	T	T	N	T	T	N	T	T	T	N	T	N	T	T	N	T	N	T	N	-	T	T	T	N	T	T	T	N	N	T	T	N	N	N	N	T
A07	AX-147229109	AX-147229109_A07		93.852	Arahy.07	73043821		N	N	T	T	N	N	T	T	N	T	T	N	T	T	T	N	T	N	T	T	N	T	N	T	N	H	-	T	T	N	T	-	T	N	N	T	T	N	H	N	N	H
A07	AX-147258312	AX-147258312_B08		99.288	Arahy.07	74359062		N	N	T	T	N	N	T	T	N	T	T	N	T	T	T	N	T	N	T	T	N	T	N	T	N	N	T	T	T	N	T	T	T	N	N	T	T	T	T	N	N	N
A07/B07	AX-147254368	AX-147254368_A07		0	Arahy.07	630591		T	N	T	N	T	T	T	N	N	N	T	T	N	N	T	T	T	N	T	N	N	T	N	T	N	T	N	T	T	T	T	N	T	N	T	N	T	T	N	T	T	N
A07/B07	AX-147226969	AX-147226969_A07		2.269	Arahy.07	830153		T	N	T	N	T	T	T	N	N	N	T	T	N	N	T	T	T	H	T	N	N	T	N	T	N	T	N	T	T	T	T	N	T	N	T	N	N	N	N	T	T	N
A07/B07	AX-147226973	AX-147226973_A07		3.281	Arahy.07	846995		T	N	T	N	T	T	T	N	N	N	T	T	N	N	T	T	T	H	T	N	N	T	T	T	N	T	N	T	T	T	T	N	T	N	T	N	N	N	N	T	T	N
A07/B07	AX-147254389	AX-147254389_B07		3.453	Arahy.07	865744		T	N	T	N	T	T	T	N	N	N	T	T	N	N	T	T	T	H	T	N	N	T	T	T	N	T	N	T	T	T	T	N	T	N	T	N	N	N	N	T	T	N
A07/B07	AX-147254382	AX-147254382_B07		9.208	Arahy.07	835399		T	N	T	N	T	T	T	N	N	N	T	T	N	N	T	T	T	N	T	N	N	T	N	T	N	T	N	T	T	T	T	T	T	N	T	N	N	N	N	T	T	N
A07/B07	AX-147254402	AX-147254402_B07		10.931	Arahy.07	1035290		T	N	T	N	T	T	T	N	N	N	T	T	N	N	T	T	N	N	T	N	N	T	T	T	N	T	N	T	T	T	T	T	T	N	T	N	N	N	N	T	T	N
A07/B07	AX-147227012	AX-147227012_A07		12.291	Arahy.07	1209193		T	N	T	N	T	T	N	N	T	N	T	T	N	N	T	T	N	N	T	N	N	T	T	T	N	T	N	T	T	T	T	T	T	N	T	N	N	N	N	T	T	N
A07/B07	AX-147227003	AX-147227003_B07		14.38	Arahy.07	1109260		T	N	T	N	T	T	T	H	T	N	T	T	N	N	H	T	N	N	T	N	N	T	T	T	N	T	N	T	T	T	T	T	T	N	T	N	H	N	N	T	T	N
A07/B07	AX-147254287	AX-147254287_B07		20.82				T	N	T	N	T	T	T	N	N	N	T	T	N	N	H	T	T	N	H	N	N	T	T	T	N	T	N	T	T	T	T	T	T	N	T	N	T	T	N	T	T	T
A07/B07	AX-147216860	AX-147216860_A03		22.359				T	N	T	N	T	T	T	N	N	N	T	T	N	N	T	T	T	N	T	N	N	T	T	T	N	T	N	T	T	T	T	N	T	N	T	N	T	T	N	T	T	T
A08	AX-147256007	AX-147256007_A08		0	Arahy.08	2410355		N	N	N	N	N	N	N	N	N	N	N	N	N	N	N	T	N	N	N	N	N	N	N	-	N	N	N	N	N	N	N	N	N	N	N	N	N	N	N	N	N	N
A08	AX-147229678	AX-147229678_A08		16.167	Arahy.08	7592863		T	N	N	N	N	N	N	N	T	N	T	T	T	N	T	T	T	T	T	T	T	H	N	T	T	T	N	T	N	N	N	N	N	N	N	N	N	T	N	H	N	N
A08	AX-147229689	AX-147229689_A08		17.919	Arahy.08	7988267		T	N	N	N	N	N	N	N	T	N	T	T	T	N	T	T	T	T	T	T	T	T	-	T	T	T	N	T	N	N	N	H	N	N	N	N	N	T	N	H	N	N
A08	AX-147229718	AX-147229718_A08		23.782	Arahy.08	8497821		T	N	N	N	N	N	N	N	T	N	T	T	T	N	T	T	T	T	T	T	T	T	N	T	T	T	N	T	N	N	N	N	N	N	N	-	N	T	N	N	N	N
A08	AX-147256437	AX-147256437_A08		43.266	Arahy.08	9887688		N	N	T	N	T	N	N	N	T	N	T	T	T	N	T	T	T	T	T	T	T	T	N	T	N	T	N	T	N	T	N	T	N	N	N	N	N	T	N	N	N	N
A08	AX-147229808	AX-147229808_A08		47.446	Arahy.08	10727547		N	N	T	N	T	N	N	N	T	N	T	N	T	N	T	N	T	T	T	T	T	T	N	T	N	T	T	T	N	T	N	T	N	T	N	N	T	T	N	N	N	N
A08	AX-147229847	AX-147229847_A08		64.322	Arahy.08	11502696		N	N	T	N	T	N	N	N	T	N	T	N	T	N	N	N	T	T	N	T	T	T	N	T	N	T	T	T	N	T	T	N	N	H	N	N	T	T	N	N	N	N
A08	AX-147256532	AX-147256532_B07		64.682	Arahy.08	11527553		N	N	T	N	T	N	N	N	T	N	T	N	T	N	N	N	T	T	N	T	T	T	N	T	N	T	H	T	N	T	T	N	N	H	N	N	T	T	N	N	N	N
A08	GM71	Ah2TC7A02	DQ099140	66.962	Arahy.08	1.18716e+07		-	N	T	N	T	N	N	N	T	N	T	N	-	N	N	N	T	-	-	T	T	T	N	T	-	T	H	T	N	T	T	N	N	T	N	N	T	H	N	N	N	N
A08	AX-147229891	AX-147229891_A08		69.186	Arahy.08	12363703		N	N	T	N	T	N	N	N	T	N	T	N	T	N	N	N	T	T	N	T	T	T	N	T	N	T	-	T	N	T	T	N	N	-	N	N	T	T	N	N	-	N
A08	AX-147229909	AX-147229909_A08		71.16	Arahy.08	12790759		N	N	T	N	T	N	N	N	T	N	T	N	T	N	N	N	T	T	N	T	T	T	N	T	N	T	H	T	N	T	T	N	N	N	N	N	T	T	N	N	H	N
A08	GM1842	GM1842	EZ721990	77.845	Arahy.08	16310083		N	T	T	-	T	N	N	N	T	T	T	N	-	N	N	H	T	T	-	T	T	N	N	T	-	T	H	T	N	T	T	T	N	N	N	N	T	T	N	N	-	N
A08	AX-147230062	AX-147230062_A08		80.536	Arahy.08	15158982		N	N	T	T	T	N	N	N	T	T	T	N	T	N	N	T	T	T	N	T	T	N	H	T	N	T	T	T	N	T	T	T	N	N	N	N	T	T	N	N	T	N
A08	AX-147256666	AX-147256666_B07		83.077	Arahy.08	14565577		N	N	T	T	T	N	N	N	T	T	T	N	T	N	N	-	T	T	N	T	T	N	-	T	N	T	H	T	N	T	T	T	N	-	N	N	T	T	N	N	T	N
A08	AX-147230058	AX-147230058_A08		84.532	Arahy.08	15147749		N	N	T	T	T	N	N	N	T	T	T	N	T	N	N	H	T	T	N	T	T	N	N	T	N	T	H	T	N	T	T	T	N	N	N	N	T	T	N	N	T	N
A08	AX-147230168	AX-147230168_A08		86.252	Arahy.08	16579446		N	T	T	T	T	N	N	N	T	T	T	N	T	N	N	H	T	T	N	T	T	N	N	T	N	T	H	T	N	T	T	T	N	N	N	N	T	T	N	N	T	N
A08	AX-147256804	AX-147256804_A08		86.421	Arahy.08	16635605		N	T	T	T	T	N	N	N	T	T	T	N	T	N	N	H	T	T	N	T	T	N	H	T	N	T	H	T	N	T	T	T	N	N	N	N	T	T	N	N	T	N
A08	AX-147230210	AX-147230210_A08		92.669	Arahy.08	17415487		N	T	T	T	T	N	N	N	T	T	T	N	T	N	N	H	T	T	N	T	T	N	H	T	N	T	H	T	N	T	T	T	N	N	N	N	T	T	N	N	T	N
A08	AX-147230217	AX-147230217_A08		93.884	Arahy.08	17562723		N	T	T	T	T	N	N	N	T	T	T	N	T	N	N	N	T	T	N	T	T	N	N	T	N	T	T	T	N	T	T	T	N	N	N	N	T	T	N	N	T	N
A08	AX-147230226	AX-147230226_A08		95.246	Arahy.08	17828975		N	T	T	T	T	N	N	N	T	T	T	N	T	N	N	H	T	T	N	T	T	N	N	T	N	T	H	T	N	T	T	T	N	N	N	N	T	T	N	N	T	N
A08	AX-147257048	AX-147257048_A08		96.035	Arahy.08	25221753		N	T	T	T	N	N	N	N	T	T	T	N	T	N	N	H	T	T	N	T	N	N	N	T	N	T	H	T	N	T	T	T	N	N	N	N	T	T	N	N	T	N
A08	AX-147257156	AX-147257156_A08		96.416	Arahy.08	26829069		N	T	T	T	N	N	N	N	T	T	T	N	T	N	N	H	T	T	N	T	-	N	N	T	N	T	H	T	N	T	T	T	N	N	N	N	T	T	N	N	T	N
A08	AX-147230326	AX-147230326_A08		96.58	Arahy.08	25513323		N	T	T	T	N	N	N	N	T	T	T	N	T	N	N	H	T	T	N	T	N	N	N	T	N	T	H	T	N	T	T	T	N	N	H	N	T	T	N	N	T	N
A08	AX-147230428	AX-147230428_A08		96.912	Arahy.08	27305455		N	T	T	T	N	N	N	N	T	T	T	N	T	N	N	H	T	T	N	T	N	N	N	T	N	T	H	T	N	T	T	T	N	N	N	N	T	T	N	N	T	N
A08	AX-147230334	AX-147230334_A08		97.661	Arahy.08	25580643		N	T	T	T	N	N	N	N	T	T	T	N	T	N	N	-	T	T	N	T	N	N	N	T	N	T	T	T	N	T	T	T	N	N	N	N	T	T	N	N	T	N
A08	AX-147230284	AX-147230284_A08		98.422	Arahy.08	24916410		N	T	T	T	N	N	N	N	T	T	T	N	T	N	N	T	T	T	N	T	N	N	N	T	N	T	T	T	N	T	T	T	N	N	N	N	T	T	N	N	T	N
A08	AX-147257051	AX-147257051_B08		98.754	Arahy.08	25222974		N	T	T	T	N	N	N	N	T	T	T	N	T	N	N	T	T	T	N	T	N	N	N	T	N	T	T	T	N	T	T	T	N	N	N	N	T	T	N	N	T	N
A08	AX-147257064	AX-147257064_A08		99.765	Arahy.08	25504361		N	T	T	T	N	N	N	N	T	T	T	N	T	N	N	T	T	T	N	T	N	N	N	T	N	T	T	T	N	T	T	T	N	N	N	N	T	T	N	N	T	N
A08	AX-147256975	AX-147256975_A03		99.86	Arahy.08	25910645		N	T	T	T	-	N	N	N	T	T	T	N	T	N	N	T	T	T	N	T	N	N	N	T	N	T	-	T	N	T	-	T	N	N	N	N	T	T	N	N	T	N
A08	AX-147257142	AX-147257142_B08		100.77	Arahy.08	25612852		N	T	T	T	N	N	N	N	T	T	T	N	T	N	N	N	T	T	N	T	N	N	N	T	N	T	N	T	N	T	T	T	N	N	N	N	T	T	N	N	T	N
A08	AX-147257200	AX-147257200_B08		103.224				N	T	T	T	N	N	N	N	T	T	T	N	T	N	N	N	T	T	N	T	N	N	T	T	N	T	N	T	N	T	T	T	N	N	N	N	T	T	N	N	T	N
A08	AX-147230449	AX-147230449_A08		103.722	Arahy.08	27662320		N	T	T	T	N	N	N	N	T	T	T	N	T	N	N	H	T	T	N	T	N	N	T	T	N	T	H	T	N	T	T	T	N	N	N	N	T	T	N	N	T	N
A08	AX-147257203	AX-147257203_B08		104.052	Arahy.08	27447132		N	T	T	T	N	N	N	N	T	T	T	N	T	N	T	H	T	T	N	T	N	N	T	T	N	T	H	T	N	T	T	T	N	N	N	N	T	T	N	N	T	N
A08	AX-147230465	AX-147230465_A08		104.383	Arahy.08	27969011		N	T	T	T	N	N	N	N	T	T	T	N	T	N	N	H	T	T	N	T	N	N	T	T	N	T	H	T	N	T	T	T	N	N	N	N	T	T	N	N	T	N
A08	AX-147244836	AX-147244836_A05		104.547	Arahy.08	28689963		N	T	T	T	N	N	N	N	T	T	T	N	T	N	N	H	T	T	N	T	N	N	T	T	N	T	H	T	N	T	T	T	N	N	N	N	T	T	N	N	T	N
A08	AX-147244840	AX-147244840_B03		104.711	Arahy.08	28691192		N	T	T	T	N	N	N	N	T	T	T	N	T	N	N	H	T	T	N	T	N	N	T	T	N	T	H	T	N	T	T	T	N	N	-	N	T	T	N	N	T	N
A08	AX-147244839	AX-147244839_B03		104.794	Arahy.08	28691163		N	T	T	T	N	N	N	N	T	T	T	N	T	N	N	H	T	T	N	T	N	N	T	T	N	T	-	T	N	T	T	T	N	N	N	N	T	T	N	N	T	N
A08	AX-147244838	AX-147244838_A08		104.875	Arahy.08	28690331		N	T	T	T	N	N	N	N	T	T	T	N	T	N	N	H	T	T	N	T	N	N	T	T	N	T	T	T	N	T	T	T	N	N	N	N	T	T	N	N	T	N
A08	AX-147244837	AX-147244837_A08		105.206	Arahy.08	28690087		N	T	T	T	N	N	N	N	T	T	T	N	T	N	N	T	T	T	N	T	N	N	T	T	N	T	T	T	N	T	T	T	N	N	N	N	T	T	N	N	T	N
A08	AX-147244835	AX-147244835_A08		105.206	Arahy.08	28689575		N	T	T	T	N	N	N	N	T	T	T	N	T	N	N	T	T	T	N	T	N	N	T	T	N	T	T	T	N	T	T	T	N	N	N	N	T	T	N	N	T	N
A08	AX-147230579	AX-147230579_A08		106.923	Arahy.08	30354909		N	T	T	T	N	N	T	T	T	T	T	N	T	N	N	T	T	T	N	T	N	N	T	T	N	T	T	T	N	T	T	T	N	N	N	N	T	T	N	N	T	N
A08	AX-147257445	AX-147257445_A08		110.145	Arahy.08	31011199		N	T	T	T	N	N	T	T	T	T	T	N	T	N	N	H	T	T	N	N	N	N	T	T	N	T	H	T	N	T	T	T	N	N	N	N	T	T	N	N	T	N
A08	AX-147230599	AX-147230599_A08		116.681	Arahy.08	30826870		N	T	T	T	N	N	T	T	T	T	T	N	N	N	N	H	T	T	N	N	N	N	T	T	N	T	H	T	N	T	T	N	N	N	N	N	T	T	N	N	T	N
A08	AX-147230663	AX-147230663_A08		120.051	Arahy.08	31699579		N	T	T	T	N	N	T	T	T	T	T	T	N	N	N	T	T	T	N	N	N	N	T	T	N	T	T	T	N	T	T	N	N	N	N	N	T	N	N	N	T	N
A08	AX-147257472	AX-147257472_A08		125.809	Arahy.08	31327160		N	T	T	T	N	N	T	T	T	T	T	T	T	N	N	T	T	T	N	N	N	N	T	T	N	T	T	T	N	T	T	T	N	N	N	N	T	N	N	N	T	N
A08	AX-147230686	AX-147230686_A08		128.328	Arahy.08	32120801		N	T	T	T	N	N	T	T	T	T	T	T	T	N	N	T	T	T	N	N	N	N	T	T	-	T	N	T	N	T	T	T	N	N	N	N	T	N	N	N	T	N
A08	AX-147230694	AX-147230694_A08		129.659	Arahy.08	32252807		N	T	T	T	N	N	T	T	T	T	T	T	T	N	N	H	T	T	N	N	N	N	T	T	N	T	H	T	N	T	T	T	N	N	N	N	T	N	N	N	T	N
A08	AX-147230728	AX-147230728_A08		131.201	Arahy.08	32943740		N	T	T	T	N	N	T	T	T	T	T	T	T	N	T	T	T	T	N	T	N	N	T	T	N	T	N	T	N	T	T	T	N	N	N	N	T	N	N	N	T	N
A08	AX-147230809	AX-147230809_A08		132.561	Arahy.08	34438967		N	T	T	T	N	N	T	T	T	T	T	T	T	T	T	N	T	T	N	T	N	N	T	T	N	T	N	T	N	T	T	T	N	N	N	N	T	T	T	N	T	N
A08	AX-147257671	AX-147257671_B08		135.966				N	T	T	T	N	N	T	T	T	T	N	T	T	T	T	N	T	T	N	T	N	N	T	T	N	T	N	T	N	T	T	T	N	N	N	N	T	T	T	N	T	N
A08	AX-147257672	AX-147257672_A08		136.172				N	T	T	T	N	N	T	T	T	T	N	T	T	T	T	N	-	T	N	T	N	N	T	T	N	H	N	T	N	T	T	T	N	N	N	N	T	T	T	N	-	N
A08	AX-147230835	AX-147230835_A08		147.152				N	T	T	T	N	N	T	T	-	H	N	T	T	T	T	N	T	T	N	T	N	N	-	T	N	T	N	T	N	T	T	N	N	N	N	N	T	T	-	N	-	N
A08	AX-147230933	AX-147230933_A08		152.358	Arahy.08	36495041		N	T	T	T	N	N	-	T	T	T	N	T	N	T	T	N	T	T	N	T	N	N	N	T	N	T	N	T	N	T	T	N	N	N	N	N	T	T	-	N	T	N
A08	AX-147231000	AX-147231000_A08		157.282	Arahy.08	37860389		N	T	T	T	N	N	T	T	T	T	N	T	N	T	T	N	N	T	N	T	N	N	N	T	N	T	T	T	T	N	T	N	N	N	N	N	T	T	-	N	T	N
A08	AX-147231058	AX-147231058_A08		160.34	Arahy.08	39187496		N	T	T	T	N	N	T	T	T	T	N	T	N	T	T	N	N	T	N	T	N	N	N	T	N	T	H	T	T	T	T	N	N	N	N	N	T	T	T	N	H	N
A08	AX-147231098	AX-147231098_A08		163.194	Arahy.08	39773515		N	T	T	T	N	N	T	T	-	T	N	T	N	T	T	N	T	T	N	T	N	N	N	T	N	T	-	T	T	T	T	N	N	N	N	N	T	T	T	N	N	N
A08	AX-147231141	AX-147231141_A08		166.232	Arahy.08	40319385		N	T	T	T	N	N	T	T	T	T	N	T	H	T	T	N	T	T	N	T	N	N	N	T	N	T	H	T	T	-	T	N	N	N	N	N	T	T	T	N	-	N
A08	AX-147231169	AX-147231169_A08		169.093	Arahy.08	40507024		N	T	T	T	N	N	T	T	T	T	N	-	N	T	T	N	T	T	N	T	N	N	N	T	N	T	T	T	-	-	T	N	N	N	N	T	T	T	T	N	N	N
A08	AX-147231178	AX-147231178_A08		171.282	Arahy.08	40609640		N	T	T	T	N	N	T	T	T	T	N	T	N	T	T	N	T	T	N	T	N	N	N	T	N	T	H	T	T	T	T	N	N	N	N	T	T	T	T	N	N	N
A08	GM422a	pPGPseq2A5		175.838				T	T	T	T	N	N	T	T	T	N	N	T	N	T	T	N	T	T	N	T	N	N	N	T	-	H	T	T	T	N	T	N	N	N	T	T	T	-	-	-	-	N
A08	AX-147258893	AX-147258893_B08		184.063				T	T	T	T	N	N	T	T	T	N	N	T	T	T	T	N	T	T	N	T	N	N	N	T	N	N	T	N	T	N	T	T	N	N	T	T	T	T	T	N	N	N
A08	AX-147231288	AX-147231288_A08		185.142	Arahy.08	42429214		T	T	T	T	N	N	T	T	T	N	N	T	T	N	T	N	T	T	N	T	N	N	N	T	N	-	T	N	T	N	T	T	N	N	T	T	T	T	-	N	N	N
A08/B08	AX-147231700	AX-147231700_B08		0	Arahy.08	47488636		N	T	N	T	N	T	T	T	T	N	T	N	T	N	T	T	N	T	N	N	N	T	N	T	N	T	N	N	T	T	T	N	T	T	N	T	N	N	N	N	N	T
A08/B08	AX-147231701	AX-147231701_A08		0.834	Arahy.08	47490340		N	T	N	T	N	T	T	-	T	T	T	N	-	N	T	T	N	T	N	N	N	T	N	T	N	T	N	N	T	T	-	N	T	T	N	T	-	N	N	N	N	T
A08/B08	AX-147231702	AX-147231702_A08		2.035	Arahy.08	47490986		N	T	N	T	N	T	T	T	T	T	T	N	-	N	T	T	N	T	N	N	N	-	N	T	N	T	N	N	T	T	T	N	T	T	N	T	T	N	N	N	N	T
A08/B08	AX-147259356	AX-147259356_B08		3.222	Arahy.08	47498537		N	T	N	T	N	T	T	T	T	T	T	N	T	N	T	T	N	T	N	N	N	T	N	T	N	T	N	N	T	T	-	N	T	T	N	T	T	N	N	N	N	T
A08/B08	AX-147259355	AX-147259355_B08		4.472	Arahy.08	47490517		N	T	N	T	N	T	T	T	T	T	T	N	T	N	T	T	N	T	N	N	N	-	N	T	N	T	N	N	T	T	N	N	T	T	N	T	T	N	N	N	N	T
A09	AX-147226069	AX-147226069_A06		0	Arahy.09	2149856		T	T	N	T	N	N	T	T	N	-	T	N	H	N	T	N	T	T	T	N	N	T	-	T	N	T	N	N	N	N	N	T	T	T	T	N	N	N	N	N	N	T
A09	AX-147259062	AX-147259062_B08		0.864	Arahy.09	2148953		T	T	N	T	N	N	T	T	N	N	T	N	T	N	T	N	T	T	T	N	N	T	N	T	N	T	N	N	N	N	N	T	T	T	T	N	N	N	N	N	T	T
A09	AX-147232269	AX-147232269_A09		4.888	Arahy.09	2635226		T	T	T	T	N	N	T	T	N	N	T	N	H	T	T	N	T	T	T	N	N	N	N	T	N	T	T	N	N	N	N	H	T	T	T	N	N	N	N	N	H	T
A09	AX-147232263	AX-147232263_A09		9.085	Arahy.09	2555853		T	T	T	T	N	N	T	T	N	N	T	N	T	T	T	N	T	T	T	N	N	N	N	T	N	T	T	N	N	N	N	N	T	T	T	N	N	N	N	N	-	T
A09	AX-147259875	AX-147259875_A09		10.317				T	T	T	T	N	N	T	T	N	N	T	N	N	T	T	N	T	T	T	N	N	N	N	T	N	T	T	N	N	N	N	N	T	T	T	N	N	N	N	N	T	T
A09	AX-147259876	AX-147259876_B09		11.327	Arahy.09	2764539		T	T	T	T	N	N	T	T	N	N	T	N	T	T	T	N	T	T	T	N	N	N	N	T	N	T	T	N	N	N	N	N	T	T	T	N	N	N	N	N	N	T
A09	AX-147232323	AX-147232323_A09		17.725	Arahy.09	3254612		T	T	T	T	N	N	T	T	N	N	T	N	T	T	T	N	T	T	T	N	N	N	N	T	N	T	N	N	N	N	N	N	T	T	T	N	N	N	N	N	N	T
A09	AX-147259914	AX-147259914_B09		18.374	Arahy.09	3171173		T	T	T	T	N	N	T	T	N	N	T	N	T	T	T	N	T	T	T	N	N	N	N	T	N	T	N	N	N	N	N	N	T	T	T	N	N	N	N	N	H	T
A09	AX-147232316	AX-147232316_B09		18.582	Arahy.09	3171173		T	T	T	T	N	N	T	T	N	N	T	N	T	T	T	N	T	T	T	N	N	N	N	T	N	T	N	N	N	N	N	N	T	T	T	N	N	N	N	N	H	T
A09	AX-147232349	AX-147232349_B09		23.039				T	T	T	T	N	N	H	T	N	N	T	N	H	-	T	N	T	T	T	N	N	N	N	T	N	T	N	T	N	N	N	N	T	T	H	N	N	N	N	N	H	T
A09	AX-147232408	AX-147232408_A09		30.314	Arahy.09	4210019		T	T	T	T	N	T	T	T	N	N	T	N	T	T	T	N	T	T	T	N	H	N	N	T	N	T	N	T	N	N	N	H	N	T	T	N	N	N	N	N	T	T
A09	AX-147260004	AX-147260004_A09		32.229	Arahy.09	4342591		T	T	T	T	N	T	T	T	N	N	T	N	T	T	T	N	T	T	T	N	H	N	N	T	N	T	N	T	N	N	N	N	N	T	-	N	N	N	N	N	T	T
A09	AX-147232462	AX-147232462_A09		34.023	Arahy.09	5159062		T	T	T	T	N	T	T	T	N	N	T	N	T	T	T	N	T	T	T	N	T	N	N	T	N	T	N	T	N	N	N	T	N	T	T	N	N	N	N	N	T	T
A09	AX-147237581	AX-147237581_A09		36.798	Arahy.09	5570590		T	T	N	T	N	T	T	T	N	N	T	N	T	T	T	N	T	T	T	N	T	N	N	T	N	T	N	T	N	N	N	T	N	T	T	N	N	N	N	N	T	T
A09	AX-147232533	AX-147232533_A09		38.703	Arahy.09	6320113		T	T	N	T	N	T	T	T	N	N	T	N	T	T	T	N	T	T	T	N	T	N	N	T	N	T	N	T	N	N	N	H	N	T	T	N	N	N	N	N	H	N
A09	AX-147260113	AX-147260113_B09		42.136	Arahy.09	6589294		T	T	N	T	N	T	T	T	N	N	T	N	T	T	T	N	T	T	T	N	T	N	N	T	N	N	N	T	N	N	T	T	N	T	T	T	N	N	N	N	T	N
A09	AX-147260122	AX-147260122_B09		42.858	Arahy.09	6829933		T	T	N	T	N	T	T	T	N	N	T	N	T	T	T	N	T	T	T	N	T	N	N	T	N	N	N	T	N	N	T	-	N	T	T	T	N	N	N	N	T	N
A09	AX-147232609	AX-147232609_A09		46.215	Arahy.09	7892754		T	T	N	T	N	T	T	T	N	N	T	N	T	T	T	N	T	H	T	N	T	N	N	T	N	N	T	T	N	N	T	N	N	T	H	T	N	N	N	N	T	N
A09	AX-147232744	AX-147232744_A09		51.733	Arahy.09	10780377		T	T	T	T	N	T	T	T	N	N	T	N	T	T	T	N	T	T	T	N	T	N	N	T	N	N	T	T	N	N	T	T	N	T	T	T	N	N	N	N	T	N
A09	AX-147260522	AX-147260522_A01		52.572	Arahy.09	12117962		T	T	T	T	N	T	T	T	N	N	T	N	T	T	T	N	T	T	T	N	T	N	N	T	N	N	T	T	N	N	T	T	N	T	T	T	N	N	N	N	-	N
A09	AX-147233009	AX-147233009_A09		57.844	Arahy.09	18913966		T	T	T	T	N	T	T	T	N	N	T	N	T	T	T	N	T	T	T	T	T	N	N	T	N	N	T	T	N	N	N	N	N	T	T	T	N	N	N	N	-	N
A09	AX-147233216	AX-147233216_A09		58.709	Arahy.09	30667750		T	T	T	T	N	T	T	T	N	-	T	N	N	T	T	H	T	T	T	T	T	N	N	T	N	N	T	T	N	N	N	N	N	T	T	T	N	N	N	N	T	N
A09	AX-147233124	AX-147233124_A09		60.07	Arahy.09	23177728		T	T	T	T	N	T	T	T	N	N	T	N	N	T	T	T	T	T	T	T	T	N	N	T	N	N	T	T	N	N	N	H	N	T	T	T	N	N	N	N	T	N
A09	AX-147233205	AX-147233205_A09		61.256	Arahy.09	30414526		T	T	T	T	N	T	T	T	N	N	T	N	N	T	T	N	T	T	T	T	T	N	N	T	N	N	T	T	N	N	N	T	N	T	T	T	N	N	N	N	T	N
A09	AX-147260989	AX-147260989_A09		62.622	Arahy.09	33419283		T	T	T	T	N	T	T	T	N	N	T	N	N	T	N	H	T	T	T	T	T	N	N	T	N	N	T	T	N	N	T	-	N	T	T	T	N	N	N	N	T	N
A09	AX-147261012	AX-147261012_B09		63.461	Arahy.09	34927788		T	T	T	T	N	T	T	T	N	N	T	N	N	T	N	N	T	T	T	T	T	N	N	T	N	N	T	T	N	N	T	T	N	T	T	T	N	N	N	N	T	N
A09	AX-147233548	AX-147233548_A09		63.961				T	T	T	T	N	T	T	T	N	N	T	N	N	T	N	N	T	T	T	T	T	N	N	T	N	N	T	T	N	N	T	T	N	T	T	T	N	N	N	N	T	N
A09	AX-147233336	AX-147233336_B09		65.147	Arahy.09	66721315		T	T	T	T	N	T	T	T	H	N	T	N	N	T	N	H	T	T	T	T	T	N	N	T	N	N	T	T	N	N	T	T	N	T	T	T	N	N	N	N	T	N
A09	AX-147233337	AX-147233337_B09		65.85				T	T	T	T	N	T	T	T	N	N	T	N	N	T	N	H	T	T	T	T	T	N	N	T	N	N	T	T	N	N	T	T	N	T	T	T	N	N	N	N	T	N
A09	AX-147261121	AX-147261121_A09		68.47	Arahy.09	66719970		T	T	T	T	-	T	T	T	N	-	T	N	N	T	N	T	T	T	T	T	T	N	N	T	N	N	T	T	N	N	T	T	N	T	T	T	N	N	N	-	T	N
A09	AX-147261250	AX-147261250_A09		70.562	Arahy.09	73232363		T	T	T	T	N	T	T	T	N	N	T	N	N	T	N	H	T	T	T	T	T	N	N	T	N	N	T	T	N	N	T	T	N	T	T	T	N	N	N	N	T	N
A09	AX-147261120	AX-147261120_B09		70.726	Arahy.09	66720234		T	T	T	T	N	T	T	T	N	N	T	N	N	T	N	H	T	T	T	T	T	N	N	T	N	N	T	T	N	N	T	T	N	T	T	T	N	N	N	N	T	N
A09	AX-147233531	AX-147233531_A09		71.207	Arahy.09	79784093		T	T	T	T	N	T	T	T	N	N	T	N	N	T	N	H	T	T	T	T	T	N	N	T	N	N	T	T	N	N	T	-	N	T	T	T	N	N	N	N	T	N
A09	AX-147233556	AX-147233556_A09		71.466	Arahy.09	83292395		T	T	T	T	N	T	T	T	N	-	T	N	N	T	N	H	T	T	T	T	T	N	N	T	N	N	T	T	N	N	T	H	N	T	T	T	N	N	N	N	T	N
A09	GM565	pPGSseq17E3	BZ999947	71.811	Arahy.09	72557927		T	T	T	T	N	T	T	T	N	N	T	N	N	T	N	H	T	T	T	T	T	N	N	T	N	N	T	T	N	N	T	-	N	T	T	T	N	N	N	N	T	N
A09	AX-147244132	AX-147244132_A09		72.101	Arahy.09	43693858		T	T	T	T	N	T	T	T	N	N	T	N	N	T	N	H	T	T	T	T	T	N	N	T	N	N	T	T	N	N	T	N	N	T	T	T	N	N	N	N	T	N
A09	AX-147233327	AX-147233327_A09		72.296	Arahy.09	53205363		T	T	T	T	N	T	T	T	N	N	T	N	N	T	N	H	T	T	T	T	T	N	N	T	N	N	T	T	N	N	T	N	N	T	T	T	N	N	N	N	T	N
A09	AX-147222333	AX-147222333_A05		72.882				T	T	T	T	N	T	T	T	N	N	T	N	N	T	N	N	T	T	T	T	T	N	N	T	N	N	T	T	N	N	-	N	N	T	T	T	N	N	N	N	-	N
A09	AX-147251338	AX-147251338_B05		73.326	Arahy.09	35405170		T	T	T	T	N	T	T	T	N	-	T	N	N	T	N	N	T	T	T	T	T	N	N	T	N	N	T	T	N	N	T	N	N	T	T	T	N	N	N	N	T	N
A09	AX-147233514	AX-147233514_A09		73.546	Arahy.09	74188671		T	T	T	T	N	T	T	T	N	N	T	N	N	T	N	N	T	T	T	T	T	N	N	T	N	N	T	T	N	N	T	-	N	T	T	T	N	N	N	H	T	N
A09	AX-147222332	AX-147222332_A05		75.447				T	T	T	T	N	T	T	H	N	N	T	N	N	-	N	N	T	H	T	T	T	N	N	T	N	N	T	T	N	N	H	N	N	T	T	T	N	N	N	N	H	N
A09	AX-147222334	AX-147222334_A05		76.913				T	T	T	T	N	T	T	T	N	N	T	N	N	T	N	-	T	T	T	T	T	N	N	T	N	N	T	T	N	N	T	N	N	T	T	T	N	N	N	N	H	N
A09	AX-147233835	AX-147233835_A09		78.103	Arahy.09	104416931		T	T	T	T	N	T	T	T	N	N	T	N	N	T	N	H	T	T	T	T	T	N	N	T	N	N	T	T	N	N	T	N	N	T	T	T	N	N	N	N	H	N
A09	AX-147233861	AX-147233861_A09		79.555	Arahy.09	104976954		T	T	T	T	N	T	T	T	N	N	T	N	N	T	N	H	T	T	T	T	T	N	N	T	N	N	T	T	N	N	T	T	N	T	T	T	H	N	N	N	H	N
A09	AX-147233767	AX-147233767_A09		80.873	Arahy.09	102412106		T	T	T	T	N	T	T	-	N	N	T	N	N	T	N	N	T	T	T	T	T	N	N	T	N	N	T	T	N	N	-	T	N	T	T	T	N	N	N	N	N	N
A09	AX-147233770	AX-147233770_A09		81.246	Arahy.09	102511327		T	T	T	T	N	T	T	T	N	N	T	N	N	T	N	N	T	T	T	T	T	N	N	T	N	N	T	T	N	N	T	T	N	T	T	T	N	N	N	N	N	N
A09	AX-147233795	AX-147233795_A09		81.576	Arahy.09	103369723		T	T	T	T	N	T	T	T	N	N	T	N	N	T	N	N	T	T	T	T	T	N	N	T	N	N	T	T	N	N	T	T	N	T	T	T	N	N	N	N	N	N
A09	AX-147233740	AX-147233740_A09		82.683	Arahy.09	101156591		T	T	T	T	N	T	T	T	N	N	T	N	N	T	N	H	T	T	T	T	T	N	N	T	N	N	T	T	N	N	T	T	N	T	T	T	N	N	N	N	N	N
A09	AX-147261423	AX-147261423_B09		82.996	Arahy.09	92691251		T	T	T	T	N	T	T	T	N	N	T	N	N	T	N	H	T	T	T	T	T	N	N	T	N	N	T	T	N	N	T	T	N	T	T	T	N	N	N	N	-	N
A09	AX-147233663	AX-147233663_A10		83.931	Arahy.09	94818516		T	T	T	T	N	T	T	T	N	N	T	N	N	T	N	N	T	T	T	T	T	N	N	T	N	N	T	T	N	N	T	T	N	T	T	T	N	N	N	N	T	N
A09	GM603	pPGSseq9B4		84.869	Arahy.09	9.36755e+07		-	T	T	T	N	T	T	T	N	-	T	N	N	T	N	H	T	T	T	T	T	N	N	T	N	N	T	T	N	N	T	-	N	T	T	T	N	-	N	N	T	N
A09	AX-147233375	AX-147233375_A09		85.107	Arahy.09	86853078		T	T	T	T	N	T	T	T	N	-	T	N	N	T	N	H	T	T	T	T	T	N	N	T	N	N	T	T	N	N	T	T	N	T	T	T	N	N	N	N	H	N
A09	AX-147233550	AX-147233550_A09		85.437	Arahy.09	80593352		T	T	T	T	N	T	T	T	N	N	T	N	N	T	N	H	T	T	T	T	T	N	N	T	N	N	T	T	N	N	T	T	N	T	T	T	N	N	N	N	H	N
A09	AX-147233491	AX-147233491_A09		85.937	Arahy.09	72358911		T	T	T	T	N	T	T	T	N	N	T	N	N	T	N	N	T	T	T	T	T	N	N	T	N	N	T	T	N	N	T	T	N	T	T	T	N	N	N	N	H	N
A09	AX-147233335	AX-147233335_A09		87.127				T	T	T	T	-	T	T	T	-	N	T	N	N	T	N	N	T	T	T	T	T	N	N	T	N	N	T	T	N	-	-	T	N	T	T	T	-	N	N	N	T	N
A09	AX-147233338	AX-147233338_B09		88.242				T	T	T	T	N	T	T	T	N	-	T	N	N	T	N	-	T	T	T	T	T	N	N	T	N	N	T	T	N	N	T	T	N	T	T	T	N	N	N	N	T	N
A09	AX-147233339	AX-147233339_B09		88.992
A09	AX-147233687	AX-147233687_A09		89.762	Arahy.09	97912116		T	T	T	T	N	T	T	T	N	N	T	N	N	T	N	H	T	T	T	T	T	N	N	T	N	N	T	T	N	N	T	N	N	T	T	T	N	N	N	N	T	N
A09	AX-147233688	AX-147233688_A09		93.867	Arahy.09	98072552		T	T	T	T	N	T	T	T	N	N	T	N	N	T	N	T	T	T	T	T	T	N	N	T	N	N	T	T	N	N	T	N	N	T	T	T	N	N	N	N	T	N
A09	AX-147261157	AX-147261157_A09		94.198	Arahy.09	58877248		T	T	T	T	N	T	T	T	N	N	T	N	N	T	N	N	T	T	T	T	T	N	N	T	N	N	T	T	N	N	T	N	N	T	T	T	N	N	N	N	T	N
A09	AX-147233781	AX-147233781_A09		98.633	Arahy.09	102880292		T	T	T	T	N	T	T	T	N	N	T	N	N	T	N	N	T	T	T	T	T	N	N	T	N	N	T	T	N	N	T	N	N	T	T	T	N	N	N	N	N	N
A09	AX-147261762	AX-147261762_A09		99.399	Arahy.09	108286548		T	T	T	T	N	T	T	T	N	N	T	N	N	T	N	N	T	T	-	T	T	N	N	T	N	N	T	T	N	N	T	-	N	T	T	T	-	N	N	N	N	N
A09	GM1076c	GM1076c_a07-b07	GO325499.1	99.853				-	T	T	T	N	T	T	T	N	N	T	N	N	T	N	N	T	-	T	T	T	N	N	T	-	N	T	T	N	N	T	-	N	T	T	T	H	-	N	N	-	N
A09	AX-147233953	AX-147233953_A09		100.809	Arahy.09	108040322		T	T	T	T	N	T	T	T	N	N	T	N	N	T	N	H	T	T	T	T	T	N	N	T	N	N	T	T	N	N	T	-	N	T	T	T	H	N	N	N	H	N
A09	AX-147262622	AX-147262622_A09		102.713				T	T	T	T	N	T	T	T	N	N	T	N	N	T	T	H	T	T	N	T	T	N	N	T	T	N	T	T	N	N	T	N	N	T	T	T	H	N	N	N	N	N
A09	AX-147234176	AX-147234176_A09		104.625	Arahy.09	111642590		T	T	T	T	N	T	T	T	N	N	T	N	N	N	T	H	T	T	N	T	T	N	N	T	T	N	T	T	N	N	T	-	N	T	T	T	H	N	N	N	N	N
A09	AX-147234236	AX-147234236_B09		108.053	Arahy.09	112161658		T	T	T	T	N	T	T	T	N	N	T	N	N	T	T	N	T	T	N	T	T	N	N	T	T	N	T	T	N	N	T	N	N	T	T	N	T	N	N	N	-	N
A09	GM66	Ah1TC5D06	DQ099206	110.892	Arahy.09	1.12619e+08		T	T	T	T	N	T	T	T	N	N	T	N	N	T	T	N	T	T	N	T	T	N	N	T	T	N	T	T	N	N	T	N	N	T	T	N	T	N	N	N	N	N
A09	AX-147234253	AX-147234253_A09		114.616	Arahy.09	112321523		T	T	T	T	N	T	T	T	N	N	T	N	N	T	T	N	T	T	N	T	T	N	N	T	T	N	T	T	N	N	T	N	N	T	T	N	H	N	N	N	H	N
A09	AX-147234360	AX-147234360_A09		119.217	Arahy.09	113556164		T	T	T	T	N	T	T	T	N	N	T	N	T	T	T	N	T	N	N	T	-	N	N	T	T	N	T	T	N	N	N	N	N	T	T	N	H	T	N	N	H	N
A09	AX-147234361	AX-147234361_A09		119.714	Arahy.09	113568566		T	T	T	T	N	T	T	T	N	N	T	N	T	T	T	N	T	N	N	T	T	N	N	T	T	N	T	T	N	N	N	N	N	T	T	N	H	T	N	N	H	N
A09	AX-147234388	AX-147234388_A09		121.432	Arahy.09	114038775		T	T	T	T	N	T	T	T	N	N	T	N	T	T	T	H	T	N	N	T	T	N	N	T	T	N	T	T	N	N	N	N	N	T	T	N	H	T	N	N	H	N
A09	AX-147234401	AX-147234401_A09		123.342	Arahy.09	114259453		T	T	T	T	N	T	T	T	N	N	T	N	T	T	T	-	T	N	N	T	T	N	N	T	T	N	T	T	N	N	N	N	N	T	T	N	-	T	N	N	N	N
A09	AX-147234421	AX-147234421_A09		124.533	Arahy.09	114611572		T	T	T	T	N	T	T	T	N	N	T	N	T	T	T	-	T	N	N	T	T	N	N	T	T	N	T	T	N	N	N	N	N	T	T	N	H	T	N	N	H	N
A09	AX-147234469	AX-147234469_A09		129.21	Arahy.09	114966251		T	T	T	T	N	T	N	N	N	N	T	H	T	T	T	H	T	N	N	T	T	N	N	T	T	N	T	T	N	N	N	N	T	T	T	N	H	T	N	T	H	N
A09	AX-147234484	AX-147234484_A09		129.382	Arahy.09	115084446		T	T	T	T	N	T	N	N	N	N	T	H	T	T	T	H	T	N	N	T	T	N	N	T	T	N	T	T	N	N	N	N	T	T	T	N	H	T	N	T	H	N
A09	AX-147234561	AX-147234561_B09		135.309	Arahy.09	115847054		T	T	T	T	N	T	N	N	N	T	T	H	T	T	T	N	T	N	N	T	T	N	N	T	T	N	N	T	N	N	N	N	T	T	N	T	-	T	N	T	H	N
A09	AX-147234649	AX-147234649_B04		143.836	Arahy.09	117038856		T	T	T	T	N	T	N	N	N	T	T	N	T	N	T	N	N	N	N	T	T	N	N	T	T	T	N	N	N	N	T	N	T	T	N	T	N	T	N	N	-	N
A09	AX-147234698	AX-147234698_A09		148.711	Arahy.09	117631504		T	N	T	T	N	T	N	N	N	T	T	T	T	N	N	N	N	N	N	T	T	N	H	T	T	T	N	N	N	N	-	N	T	T	N	T	N	T	N	N	-	N
A09	AX-147263479	AX-147263479_B10		156.371	Arahy.09	117807334		N	N	T	T	N	T	N	N	N	T	N	T	T	N	N	N	N	N	N	T	T	N	N	T	T	T	N	N	N	N	T	N	T	T	N	T	N	T	N	N	N	N
A09	AX-147234706	AX-147234706_A09		157.097	Arahy.09	117814345		H	N	T	T	N	T	N	N	N	T	N	T	T	N	N	N	N	N	N	T	T	N	N	T	T	T	N	N	N	N	T	N	T	T	N	T	N	T	N	N	N	N
A09	AX-147234722	AX-147234722_A09		158.868	Arahy.09	118018202		H	N	T	T	N	T	N	N	N	T	N	T	T	N	N	N	N	N	N	T	T	N	H	T	T	T	N	N	N	N	-	N	T	T	N	T	N	T	N	N	N	N
A09	AX-147234723	AX-147234723_A09		159.535	Arahy.09	118050244		H	N	T	T	N	T	N	N	N	T	N	T	T	N	N	N	N	N	N	T	T	N	H	T	T	T	N	N	N	N	T	N	T	T	N	T	N	T	N	N	N	N
A09	AX-147234788	AX-147234788_A09		183.678	Arahy.09	119179063		T	N	T	T	T	T	T	-	N	T	N	T	T	T	T	N	N	N	N	N	T	N	T	T	T	T	N	N	N	T	T	T	N	T	N	T	N	N	N	-	N	T
A10	AX-147237082	AX-147237082_A10		0	Arahy.10	114750105		T	T	N	T	T	N	N	N	T	N	T	T	N	N	T	N	N	T	N	N	T	N	N	T	N	T	N	N	T	T	N	T	N	T	N	N	T	T	N	T	N	N
A10	AX-147237183	AX-147237183_A10		7.688	Arahy.10	115452773		T	T	N	T	N	N	N	N	T	N	T	T	N	N	T	N	T	T	N	N	T	N	N	N	N	T	T	N	T	T	T	N	N	T	N	N	T	T	N	T	H	N
A10	AX-147237192	AX-147237192_A10		8.699	Arahy.10	115460751		T	T	N	T	N	N	N	N	T	H	T	T	N	N	T	N	T	T	T	N	T	N	N	N	N	T	T	N	T	T	T	N	N	T	N	N	T	T	N	T	H	N
A10	AX-147237228	AX-147237228_A10		13.603	Arahy.10	115748859		T	T	N	T	N	N	N	N	T	N	H	T	N	N	T	N	T	T	N	N	T	N	N	N	N	T	T	N	T	T	T	N	N	T	T	N	T	T	N	T	N	N
A10	AX-147237266	AX-147237266_A10		17.553	Arahy.10	116191802		T	T	N	T	N	N	N	N	H	N	T	T	N	N	T	N	T	T	H	N	T	N	N	N	N	T	T	N	T	T	H	-	N	T	T	N	T	T	N	T	H	N
B01	GM564	pPGSseq17E1		0	Arahy.11	48777427		N	N	T	T	N	T	T	T	T	T	H	H	N	N	T	N	T	N	N	T	N	N	N	N	N	H	N	T	T	T	N	T	N	N	T	N	N	T	T	N	H	N
B01	AX-147238639	AX-147238639_A01		6.027	Arahy.11	99071904		N	N	T	T	N	T	T	T	T	T	H	N	N	N	T	N	T	N	N	T	N	N	N	N	N	H	N	T	T	T	N	N	N	N	T	N	N	T	T	N	-	N
B01	AX-147238636	AX-147238636_B01		6.391	Arahy.11	94509796		N	N	T	T	N	T	T	T	T	T	H	N	N	N	T	N	T	N	N	T	N	N	N	N	N	H	N	T	T	T	N	N	N	N	T	N	N	T	T	N	T	N
B01	AX-147211461	AX-147211461_B01		6.889	Arahy.11	99074276		N	N	T	T	N	T	T	T	T	T	H	N	N	N	T	N	T	N	N	T	N	N	N	N	N	H	N	T	T	T	N	N	N	N	T	N	N	T	T	N	T	N
B01	AX-147238642	AX-147238642_B01		7.899	Arahy.11	99074784		N	N	T	T	N	T	T	T	T	T	H	N	N	N	T	N	T	N	N	T	N	N	N	N	N	T	N	T	T	T	N	N	N	N	T	N	N	T	T	N	T	N
B01	AX-147211458	AX-147211458_B01		8.838	Arahy.11	99070752		N	N	T	T	N	T	T	T	T	T	T	N	N	N	T	N	T	N	N	T	N	N	N	N	N	T	N	T	T	T	N	N	N	N	T	N	N	T	T	N	T	N
B01	AX-147211459	AX-147211459_A01		9.577				N	N	T	T	N	T	T	T	T	T	T	N	N	N	T	N	T	N	N	T	N	N	N	N	N	T	N	T	T	T	N	N	N	N	T	N	N	T	T	N	T	N
B01	AX-147236542	AX-147236542_A10		9.908				N	N	T	T	N	T	T	T	T	-	T	N	N	N	T	N	T	N	N	T	N	N	N	N	N	-	N	T	T	T	N	N	N	N	T	N	N	T	T	N	-	N
B01	AX-147238808	AX-147238808_B01		10.645	Arahy.11	125539444		N	N	T	T	N	T	T	T	T	T	-	N	N	N	T	N	T	T	N	T	N	N	N	N	N	T	N	T	T	T	N	N	N	N	T	N	N	T	T	N	T	N
B01	AX-147238747	AX-147238747_B01		11.527	Arahy.11	120043595		N	N	T	T	N	T	T	T	T	T	-	N	N	N	T	N	T	T	N	T	N	N	N	N	N	T	N	T	T	T	N	N	N	N	T	N	N	T	T	N	T	N
B01	AX-147238711	AX-147238711_B01		12.946	Arahy.11	115680691		N	N	T	T	N	T	T	T	T	T	N	N	N	N	T	N	T	T	N	T	N	N	N	N	N	T	N	T	T	T	N	N	N	N	T	N	N	T	T	N	T	N
B01	AX-147238804	AX-147238804_B01		14.153	Arahy.11	125439818		N	N	T	T	N	T	T	T	T	T	-	N	N	N	T	N	T	T	N	T	N	N	N	N	N	-	N	T	T	T	-	N	N	N	T	N	-	T	T	N	T	N
B01	AX-147212082	AX-147212082_B01		15.147				N	N	T	T	N	T	T	T	H	T	N	N	N	N	T	N	T	T	N	T	N	N	N	N	N	N	N	T	T	T	N	N	N	N	T	N	N	T	T	N	H	N
B01	AX-147214594	AX-147214594_B01		16.685				N	N	T	H	N	T	T	T	H	-	N	N	N	N	T	N	T	N	N	-	N	N	N	N	N	N	N	T	T	-	N	N	N	N	T	N	N	T	T	N	N	N
B01	AX-147238701	AX-147238701_B01		18.26	Arahy.11	92230987		N	N	T	T	N	T	T	T	T	T	N	N	N	N	T	N	T	N	N	T	N	N	N	N	N	-	N	T	T	T	N	N	N	N	-	N	N	T	T	N	N	N
B01	AX-147214593	AX-147214593_B01		19.787				N	N	T	T	N	T	T	T	N	T	N	N	N	N	T	N	T	N	N	T	N	N	N	N	N	N	N	T	T	T	N	N	N	N	T	N	N	T	T	N	T	N
B01	AX-147214591	AX-147214591_B01		20.675				N	N	T	T	N	T	T	T	T	T	N	N	N	N	T	N	T	N	N	T	N	-	N	N	N	N	N	T	T	T	N	N	N	N	T	N	N	T	T	N	-	N
B01	AX-147238586	AX-147238586_B01		21.127	Arahy.11	87439780		N	N	T	T	N	T	T	-	-	T	N	N	N	N	T	N	T	N	N	T	N	N	N	N	N	H	N	T	T	T	N	N	N	N	T	N	N	T	T	N	T	N
B01	AX-147238548	AX-147238548_B01		21.513	Arahy.11	64141785
B01	AX-147238590	AX-147238590_B01		21.537	Arahy.11	76149909		N	N	T	T	N	T	T	T	T	T	N	N	N	N	T	N	T	N	N	T	N	N	N	N	N	H	N	T	T	T	N	N	N	N	T	N	N	T	T	N	H	N
B01	AX-147238626	AX-147238626_B01		21.558	Arahy.11	88217714		N	N	T	T	N	T	T	T	T	T	-	N	N	N	T	N	T	N	N	T	N	N	N	N	N	H	N	T	T	T	N	N	N	N	T	N	N	T	T	N	H	N
B01	AX-147238628	AX-147238628_B01		22.07	Arahy.11	89704707		N	N	T	T	N	T	T	T	T	T	H	N	N	N	T	N	T	N	N	T	N	N	N	N	N	H	N	T	T	T	N	N	N	N	T	N	N	T	T	N	-	N
B01	AX-147238641	AX-147238641_A01		22.126				N	N	T	T	N	T	T	T	T	T	H	N	N	N	T	N	T	N	N	T	N	N	N	N	N	H	N	T	T	T	N	N	N	N	T	N	N	T	T	N	T	N
B01	AX-147238790	AX-147238790_B01		22.793	Arahy.11	124749392		N	N	T	T	N	T	T	T	T	T	H	N	N	N	T	N	H	T	N	T	N	N	N	N	N	H	N	T	T	T	N	N	N	N	T	N	N	T	T	N	T	N
B01	AX-147238624	AX-147238624_B01		23.619	Arahy.11	104708625		N	N	T	T	N	T	T	T	T	T	H	N	N	N	T	N	T	T	N	T	N	N	N	N	N	H	N	T	T	T	N	N	N	N	T	N	N	T	T	N	H	N
B01	AX-147238787	AX-147238787_B01		23.632				N	N	T	T	N	T	T	T	T	T	-	N	N	N	T	N	T	T	N	T	N	N	N	N	N	-	N	T	T	T	N	N	N	N	T	N	N	T	T	N	H	N
B01	AX-147238672	AX-147238672_B01		23.965	Arahy.11	112148191		N	N	T	T	N	T	T	T	T	T	H	N	N	N	T	N	T	T	N	T	N	N	N	N	N	H	N	T	T	T	N	N	N	N	T	N	N	T	T	N	H	N
B01	GM496a	pPGPseq8E12		26.453				-	N	T	T	N	T	T	T	T	T	H	N	T	T	T	N	T	-	N	T	N	N	N	N	-	H	N	T	N	T	N	N	N	N	T	N	T	-	T	N	H	N
B01	AX-147212042	AX-147212042_A01		29.262	Arahy.11	130769224		N	N	T	T	N	T	T	T	T	T	H	N	N	N	T	N	T	T	N	T	N	N	N	N	N	H	N	T	T	T	N	N	N	N	T	N	N	T	T	N	-	N
B01	AX-147238839	AX-147238839_B01		30.542	Arahy.11	127224692		N	N	T	T	N	T	T	T	T	T	-	N	N	N	T	N	T	T	N	T	N	N	N	N	N	N	N	T	T	T	N	N	N	N	T	N	N	T	T	N	T	N
B01	AX-147238696	AX-147238696_B01		31.542	Arahy.11	113764791		N	N	T	T	N	T	T	T	T	T	N	N	N	N	T	N	T	T	N	T	N	N	N	N	N	-	N	T	T	T	-	N	N	N	T	N	N	T	T	N	T	N
B01	AX-147238779	AX-147238779_B01		33.267	Arahy.11	124122931
B01	AX-147233425	AX-147233425_B01		33.698	Arahy.11	125339787		N	N	T	T	N	T	T	T	T	T	N	N	N	N	T	N	T	T	N	T	N	N	N	N	N	-	N	T	T	T	N	N	N	N	T	N	N	T	T	N	H	N
B01	AX-147238935	AX-147238935_B01		35.389	Arahy.11	132537100		N	N	T	T	N	T	T	T	N	T	N	N	N	N	T	N	T	T	-	T	N	N	N	N	N	H	N	T	-	-	N	N	N	N	T	N	-	T	T	N	H	N
B01	AX-147239004	AX-147239004_B01		39.186	Arahy.11	134703037		N	N	T	T	N	T	T	T	N	T	N	T	N	N	T	N	T	N	N	T	N	N	N	N	T	H	N	T	T	T	N	N	N	N	N	N	H	T	T	N	T	N
B01	AX-147239012	AX-147239012_B01		40.198	Arahy.11	134910677		N	N	T	T	N	T	T	T	N	T	N	T	N	N	T	N	T	N	N	T	N	N	N	N	T	N	N	T	T	T	N	N	N	N	N	N	T	T	T	N	T	N
B01	AX-147239030	AX-147239030_B01		41.559	Arahy.11	135241732		N	N	T	T	N	T	T	T	N	T	N	T	N	N	T	N	T	N	N	T	N	N	N	N	T	H	N	T	T	T	T	N	N	N	N	N	T	T	T	N	T	N
B01	AX-147239119	AX-147239119_B01		42.478	Arahy.11	137702678		N	N	T	T	N	T	T	T	N	T	N	T	N	N	T	N	T	N	N	T	N	N	N	N	T	T	N	T	T	T	T	N	N	N	N	N	T	T	T	N	T	N
B01	AX-147239168	AX-147239168_B01		43.451	Arahy.11	138825340		N	N	T	T	N	T	T	T	N	T	N	T	N	N	T	N	T	N	-	T	N	N	N	N	T	T	N	T	T	T	T	N	N	N	T	N	T	T	T	N	T	N
B01	AX-147239465	AX-147239465_B01		60.176	Arahy.11	145904619
B01	AX-147239460	AX-147239460_B01		64.507	Arahy.11	145876454		N	N	T	T	N	N	T	T	N	N	T	T	T	N	T	H	N	N	N	N	N	N	H	N	T	H	N	N	T	T	T	-	N	N	N	N	N	T	T	N	T	N
B01	AX-147239539	AX-147239539_B01		73.105	Arahy.11	146794576		N	N	T	T	N	N	T	T	N	N	N	T	T	N	T	N	N	N	N	N	N	N	N	N	N	T	N	N	T	T	T	N	N	N	N	N	N	T	N	N	T	T
B01	AX-147239601	AX-147239601_B01		85.802	Arahy.11	147611130		N	N	N	T	N	N	T	T	N	N	N	T	H	N	T	N	T	N	N	N	H	N	N	N	N	N	N	N	T	N	T	N	N	N	N	N	N	T	N	N	N	T
B01	AX-147239644	AX-147239644_B01		103.002	Arahy.11	148189740		N	N	N	T	N	N	T	T	T	T	N	N	T	N	T	T	T	N	N	N	T	N	N	N	N	N	N	H	T	N	T	N	N	N	N	N	N	N	N	N	N	T
B01	AX-147239645	AX-147239645_B01		103.5	Arahy.11	148218921		N	N	N	T	N	N	T	T	T	T	N	N	T	N	T	T	T	N	N	N	T	N	N	N	N	N	N	T	T	N	T	N	N	N	N	N	N	N	N	N	N	T
B01	AX-147239674	AX-147239674_B01		107.622	Arahy.11	148516162		N	N	N	T	N	N	T	T	T	T	N	N	T	N	T	T	N	N	N	N	N	N	N	N	N	N	N	T	T	N	T	T	N	N	N	N	T	N	N	N	N	T
B01	AX-147211662	AX-147211662_B01		123.462	Arahy.11	148930178		N	N	N	T	N	N	T	T	-	T	N	N	T	N	T	T	N	N	H	N	N	N	N	N	N	N	N	T	T	N	T	N	N	N	N	N	T	N	N	N	-	T
B01	AX-147239720	AX-147239720_B01		123.638	Arahy.11	148929127		N	N	N	T	N	N	T	T	T	T	N	N	H	N	T	T	N	N	H	N	N	N	N	N	N	N	N	T	T	N	T	N	N	N	N	N	T	N	N	N	N	T
B01	AX-147239759	AX-147239759_B01		123.638	Arahy.11	149168580		N	N	N	T	-	N	T	T	T	T	N	N	H	N	T	T	N	N	H	-	N	N	N	N	N	N	N	T	T	N	T	N	N	N	N	N	T	N	N	-	-	T
B01	AX-147211642	AX-147211642_B01		126.647				N	N	N	T	N	N	T	T	N	-	N	N	N	N	T	T	N	N	N	N	N	N	N	N	N	N	N	T	T	N	T	N	N	N	N	N	T	N	N	N	N	T
B02	AX-147240466	AX-147240466_B02		0	Arahy.12	5238566		N	T	T	T	T	T	N	N	N	N	T	T	H	T	T	T	T	N	T	N	N	T	T	T	T	T	N	N	T	T	N	T	T	T	N	N	N	N	N	T	H	T
B02	AX-147212888	AX-147212888_B02		2.102	Arahy.12	5544673		N	T	T	T	T	T	T	T	N	N	T	T	-	T	T	T	T	N	T	N	N	T	T	T	T	T	N	N	T	T	N	-	T	T	N	N	N	N	N	T	N	T
B02	AX-147212960	AX-147212960_B02		10.032	Arahy.12	6537523		N	N	T	T	T	T	T	T	N	N	T	T	N	T	T	T	T	N	T	N	N	T	T	T	T	T	N	N	T	T	N	T	T	T	N	N	N	N	N	T	-	T
B02	AX-147240553	AX-147240553_B02		11.079	Arahy.12	6526501		N	N	T	T	T	T	T	T	N	N	T	T	N	T	T	T	T	N	T	N	N	T	H	T	T	T	N	N	T	T	N	T	T	T	N	N	N	N	N	T	N	T
B02	AX-147212973	AX-147212973_A02		11.917	Arahy.12	6759592		N	N	T	T	T	T	T	T	N	N	T	T	N	T	T	T	T	N	T	N	N	T	T	T	T	T	N	N	T	T	N	T	T	T	N	N	N	N	N	T	N	T
B02	AX-147240589	AX-147240589_B02		12.928	Arahy.12	6916411		N	N	T	T	-	T	T	T	N	N	T	T	N	T	T	T	T	N	T	N	N	T	-	T	T	T	N	N	T	T	N	T	T	T	N	N	N	N	N	T	N	T
B02	AX-147240624	AX-147240624_B02		14.561	Arahy.12	7187456		N	N	T	T	T	T	T	T	N	T	T	T	N	T	T	T	T	N	T	N	N	T	T	T	T	T	N	N	T	T	N	T	T	T	N	N	N	N	N	T	N	T
B02	AX-147240687	AX-147240687_B02		16.017	Arahy.12	8264905		N	N	T	T	T	T	T	T	N	T	T	T	N	T	T	T	T	N	T	N	N	T	T	T	T	T	N	N	T	T	N	T	T	T	N	N	N	N	N	T	T	T
B02	AX-147240702	AX-147240702_B02		17.625	Arahy.12	8333767		N	N	T	T	T	T	T	T	N	T	T	T	N	T	T	T	T	N	T	N	N	T	T	T	T	T	N	N	T	T	N	T	T	T	N	N	T	T	N	T	T	T
B02	AX-147213125	AX-147213125_B02		27.919	Arahy.12	9121273
B02	GM376	PM32		29.818				N	N	T	T	T	T	T	T	N	T	T	T	T	T	T	T	T	T	N	N	N	T	T	T	N	T	N	N	T	T	N	T	T	T	N	N	T	-	N	T	T	T
B02	AX-147213199	AX-147213199_A02		32.273	Arahy.12	10540143		N	N	T	T	T	T	T	T	N	T	T	T	T	T	T	T	T	T	N	N	N	T	T	T	N	T	N	N	T	T	N	T	T	T	N	N	T	T	N	T	T	T
B02	AX-147213200	AX-147213200_A05		32.603	Arahy.12	10540146		N	N	T	T	T	T	T	T	N	T	T	T	T	T	T	T	T	T	N	N	N	T	T	T	N	T	N	N	T	T	N	T	T	T	N	N	T	T	N	T	T	T
B02	AX-147240814	AX-147240814_B02		34.567	Arahy.12	11643258		N	N	T	T	T	T	T	T	N	T	T	T	T	T	T	T	T	T	N	N	N	T	T	T	N	T	N	N	T	T	N	T	T	T	N	N	T	T	N	T	T	T
B02	AX-147213208	AX-147213208_A02		35.344	Arahy.12	10871033		N	N	T	T	T	T	T	T	N	T	T	T	T	T	T	T	T	T	N	N	N	T	T	T	N	T	N	N	T	T	N	N	T	T	N	N	T	T	N	T	T	T
B02	AX-147213263	AX-147213263_A02		36.354	Arahy.12	11738293		N	N	T	T	T	T	T	T	N	T	T	T	T	T	T	T	T	T	N	N	N	T	T	T	N	T	N	N	T	T	N	N	T	T	N	N	T	T	N	T	T	T
B02	AX-147213249	AX-147213249_A02		36.569	Arahy.12	11832063		N	N	T	T	T	T	T	T	N	T	T	T	T	T	T	T	T	T	N	N	N	T	T	T	N	T	N	N	T	T	N	N	T	T	N	N	T	T	N	T	T	T
B02	AX-147213252	AX-147213252_B02		37.038	Arahy.12	12171077		N	N	T	T	T	T	T	T	N	T	T	T	T	T	T	T	T	T	N	N	N	T	T	T	N	T	N	N	T	T	N	N	T	T	-	N	T	T	N	T	T	T
B02	AX-147213253	AX-147213253_B02		37.355	Arahy.12	11643522		N	N	T	T	T	T	T	T	N	T	T	T	T	T	T	T	T	T	N	N	N	T	T	T	N	T	N	N	T	T	-	N	T	T	H	N	T	T	N	T	T	T
B02	GM421	pPGPseq1B9		41.414				N	N	T	T	T	T	T	T	N	T	T	T	T	T	T	T	T	T	N	T	N	T	T	T	N	T	N	N	T	T	N	T	T	T	N	N	N	-	N	T	T	N
B02	AX-147240901	AX-147240901_B02		49.156	Arahy.12	14172535		N	N	T	T	T	T	T	T	N	T	T	T	N	T	T	T	T	T	N	N	N	T	T	T	N	T	N	N	T	T	N	N	T	T	N	N	N	T	N	T	T	N
B02	AX-147233757	AX-147233757_A09		50.521				N	N	T	T	T	T	T	T	N	T	T	T	N	T	T	T	T	T	N	T	N	T	T	T	N	T	N	N	T	T	N	-	T	T	N	N	N	T	-	T	T	N
B02	AX-147229657	AX-147229657_B02		52.062	Arahy.12	24870425		N	N	T	T	-	T	T	T	N	T	T	T	N	T	T	T	T	T	N	T	N	T	T	T	N	T	N	N	T	T	N	N	T	T	N	N	N	T	N	T	T	N
B02	GM403	PM200		53.121	Arahy.12	26526907		-	N	T	T	T	T	T	T	N	T	T	T	-	T	T	T	T	-	N	T	N	T	T	T	-	T	N	N	T	T	N	N	T	T	N	N	N	T	N	T	T	N
B02	AX-147221767	AX-147221767_B02		53.655	Arahy.12	29939105		N	N	T	T	T	T	T	T	-	T	T	T	N	T	T	T	T	T	N	T	N	T	T	T	H	T	N	N	T	T	-	N	T	T	-	N	N	T	N	T	T	N
B02	AX-147241257	AX-147241257_B02		54.782	Arahy.12	37950435		N	N	T	T	T	T	T	T	N	T	T	T	N	T	T	T	T	T	N	T	N	T	T	T	N	T	N	N	T	T	N	N	T	T	H	N	N	T	T	T	T	N
B02	AX-147241424	AX-147241424_B02		56.004	Arahy.12	59287065		N	N	T	T	T	T	T	T	N	T	T	T	N	T	T	T	T	T	N	T	N	T	T	T	N	T	N	N	T	T	N	N	T	T	N	N	N	T	T	T	T	N
B02	AX-147223069	AX-147223069_B02		56.81	Arahy.12	60615344		N	N	T	T	T	T	T	T	N	T	T	T	N	T	T	T	T	T	N	T	N	T	T	T	N	T	N	N	T	T	N	N	T	T	-	N	N	T	T	T	T	N
B02	AX-147213797	AX-147213797_B02		57.649	Arahy.12	59549294		N	N	T	T	T	T	T	T	N	T	T	T	N	T	T	T	T	T	N	T	N	T	T	T	N	T	N	N	T	T	N	N	T	T	N	N	-	T	T	T	T	N
B02	AX-147241398	AX-147241398_B02		57.972	Arahy.12	63201635		N	N	T	T	T	T	T	T	N	T	T	T	N	T	T	T	T	T	N	T	N	T	T	T	N	T	N	N	T	T	N	N	T	T	N	N	N	T	T	T	T	N
B02	AX-147241305	AX-147241305_B02		57.98	Arahy.12	66027967		N	N	T	T	T	T	T	T	N	T	T	T	N	T	T	T	T	T	N	T	N	T	T	T	N	T	N	N	T	T	N	N	T	T	N	N	N	T	T	T	T	N
B02	AX-147213885	AX-147213885_A02		60.445				N	N	T	T	H	T	T	T	N	T	T	T	N	T	T	T	T	T	N	T	N	T	T	T	N	T	N	N	T	T	N	N	T	T	N	N	N	T	T	T	T	N
B02	GM253	pPGPSeq4E8		63.601	Arahy.12	8.26379e+07		-	N	T	T	T	T	T	T	N	T	T	T	N	T	T	T	T	T	N	T	N	T	T	T	N	T	N	N	T	T	N	T	T	T	N	N	N	N	T	T	T	-
B02	AX-147241551	AX-147241551_B02		66.544	Arahy.12	86059183		N	N	T	T	T	T	T	T	N	T	T	T	N	T	T	T	T	T	N	T	N	T	T	T	N	T	N	N	T	T	N	N	T	T	N	N	N	T	T	T	T	N
B02	AX-147241643	AX-147241643_B02		68.008	Arahy.12	92740526		N	N	T	T	T	H	T	T	N	-	T	T	N	T	T	T	T	T	N	T	N	T	N	T	N	T	N	N	T	T	N	N	T	T	N	N	N	T	T	T	T	N
B02	AX-147241684	AX-147241684_B02		69.328	Arahy.12	94513440		N	N	T	T	T	T	T	T	N	T	T	T	N	T	T	T	T	T	N	T	N	T	N	T	-	T	N	N	T	T	N	-	T	T	N	N	N	T	T	T	T	N
B02	AX-147241639	AX-147241639_B02		70.274	Arahy.12	92587048
B02	AX-147241659	AX-147241659_B02		71.734	Arahy.12	93079915		N	N	T	T	T	H	T	T	N	T	T	T	N	T	T	T	T	T	N	T	N	T	N	T	N	T	N	N	T	T	N	N	T	T	N	N	N	T	T	T	T	N
B02	AX-147241700	AX-147241700_B02		73.963	Arahy.12	95242657		N	N	T	T	T	H	T	T	N	T	T	T	N	T	T	T	T	T	N	T	N	T	N	T	N	T	N	N	T	T	N	N	T	T	N	N	N	N	T	T	T	N
B02	AX-147241694	AX-147241694_B02		74.682	Arahy.12	95173221		N	N	T	T	T	H	T	T	N	T	T	T	N	T	T	T	T	T	N	T	N	T	N	T	N	T	N	N	T	T	N	N	T	T	N	N	N	N	T	T	T	N
B02	AX-147241802	AX-147241802_B02		76.407	Arahy.12	99297001		N	N	T	T	T	N	T	T	N	T	T	N	N	T	N	T	T	T	N	T	N	T	N	T	N	T	N	N	T	T	N	N	T	T	N	N	N	N	T	T	T	N
B02	AX-147241763	AX-147241763_B02		77.347	Arahy.12	97938048		N	N	T	T	T	N	T	T	N	T	T	N	N	T	N	T	T	T	N	T	N	T	N	T	N	T	N	N	T	T	N	N	T	T	N	N	N	N	T	T	T	N
B02	AX-147241927	AX-147241927_B02		80.425	Arahy.12	103305574		N	N	T	T	T	N	T	T	N	T	T	N	N	T	N	T	T	T	N	T	N	T	N	T	N	T	N	N	T	T	N	N	T	T	N	N	N	N	T	T	T	N
B02	AX-147214421	AX-147214421_B02		87.443	Arahy.12	103281147		N	N	T	T	T	N	T	T	N	T	T	N	T	T	N	T	T	T	N	T	N	T	N	T	N	T	N	N	T	T	N	T	T	T	N	N	N	N	T	T	T	N
B02	AX-147241912	AX-147241912_B02		87.941	Arahy.12	102873370		N	N	T	T	T	N	T	T	N	T	T	N	T	T	N	T	T	T	N	T	N	T	N	T	N	T	N	N	T	T	N	T	T	T	N	N	N	N	T	T	T	N
B02	AX-147241902	AX-147241902_B02		88.608	Arahy.12	102315248		N	N	T	T	T	N	T	T	N	T	T	N	T	T	N	T	T	T	N	T	N	T	N	T	N	T	N	N	T	T	N	T	T	T	N	N	N	N	T	T	T	N
B02	AX-147241852	AX-147241852_B02		89.446	Arahy.12	101647443		N	N	T	T	T	N	T	T	N	T	T	N	T	T	N	T	T	T	N	T	N	T	N	T	N	T	N	N	T	T	N	T	T	T	N	N	N	N	T	T	T	N
B02	AX-147214309	AX-147214309_A02		89.446	Arahy.12	101160127		N	N	T	T	T	N	T	T	N	T	T	N	T	T	N	T	T	T	N	T	N	T	N	T	N	T	N	N	T	T	N	T	T	T	N	N	N	N	T	T	T	N
B02	AX-147214307	AX-147214307_B02		90.352	Arahy.12	101160079		N	N	T	T	T	N	T	T	N	T	T	N	T	T	N	T	T	T	-	T	N	T	N	T	N	T	N	N	T	T	H	T	T	T	H	N	-	N	T	T	T	N
B02	AX-147241833	AX-147241833_B02		91.906	Arahy.12	100785489		N	N	T	T	T	N	T	T	N	T	T	N	T	T	N	T	T	T	N	T	N	T	N	T	N	T	N	N	T	T	N	T	T	T	N	N	N	N	T	T	T	N
B02	AX-147214308	AX-147214308_A02		93.745	Arahy.12	101444137		-	N	T	T	T	N	T	T	N	T	T	N	T	T	N	-	T	T	N	T	N	T	N	T	N	T	N	N	N	T	N	T	T	T	N	N	N	N	T	T	T	N
B02	AX-147214298	AX-147214298_A02		96.015	Arahy.12	101147105		N	N	T	T	T	N	T	T	N	T	T	N	T	T	N	T	T	T	N	T	N	T	N	T	N	T	N	N	T	T	N	T	T	T	N	N	N	N	T	T	T	N
B02	GM532d	pPGSseq14D11		99.085				-	N	T	T	T	N	T	T	N	T	T	N	T	T	N	T	T	-	N	T	N	T	N	T	-	T	N	N	T	T	N	T	T	T	N	N	N	N	T	T	T	N
B02	AX-147214518	AX-147214518_A02		101.901	Arahy.12	104503138		T	N	T	T	T	N	T	T	N	T	T	N	T	T	N	H	T	N	N	T	N	T	N	T	N	T	N	N	T	T	N	T	T	T	N	N	N	N	T	T	N	N
B02	AX-147242003	AX-147242003_B02		103.088	Arahy.12	104855099		T	T	T	T	T	N	T	T	N	T	T	N	T	T	N	H	T	N	T	T	N	T	N	T	N	T	N	N	T	T	N	T	T	T	N	N	N	N	T	T	N	N
B02	AX-147242013	AX-147242013_B02		103.64	Arahy.12	104885816		T	T	T	T	T	N	T	T	N	T	T	N	T	T	N	H	T	N	T	N	N	T	N	T	N	T	N	N	T	T	N	T	T	T	N	N	N	N	T	T	N	N
B02	AX-147214542	AX-147214542_B02		105.292	Arahy.12	104722983		T	T	T	T	T	N	T	T	N	T	T	N	T	T	N	-	T	N	N	T	N	T	N	T	N	T	N	N	T	T	N	T	T	T	N	N	-	N	T	T	N	N
B02	AX-147214548	AX-147214548_B02		105.304	Arahy.12	104782409		T	T	T	T	T	N	T	T	N	T	T	N	T	T	N	T	T	N	N	T	N	T	N	T	N	T	N	N	T	T	N	T	T	T	N	N	N	N	T	T	N	N
B02	AX-147214544	AX-147214544_B02		108.289	Arahy.12	104780489		T	T	T	T	T	N	T	T	-	-	T	N	T	T	-	-	T	N	-	T	N	T	N	T	N	T	N	N	T	T	T	T	T	T	-	N	N	N	T	T	-	N
B02	AX-147226857	AX-147226857_B02		114.909	Arahy.12	107833467		T	T	T	T	T	N	T	T	N	T	T	-	-	T	T	T	T	N	T	N	-	T	-	T	T	T	N	N	T	T	N	T	T	T	T	N	T	-	T	T	T	N
B02	AX-147242218	AX-147242218_B02		121.252	Arahy.12	108615348		T	T	T	T	T	N	T	T	N	T	T	N	T	T	N	-	T	N	T	N	N	T	N	T	N	T	N	N	T	T	N	T	T	T	N	-	H	N	T	T	N	N
B02	AX-147242227	AX-147242227_B02		128.634	Arahy.12	108998459		T	T	T	T	T	N	T	T	N	T	T	N	N	T	N	-	T	N	T	N	N	T	N	T	N	T	N	N	T	T	N	N	T	-	N	N	T	N	-	T	N	N
B02	AX-147242222	AX-147242222_B02		129.475	Arahy.12	108916711		T	T	T	T	T	N	T	T	N	T	T	N	N	T	N	T	T	N	T	N	N	T	N	T	N	T	N	N	T	T	N	N	T	T	N	N	T	N	T	T	-	N
B02	AX-147242242	AX-147242242_B02		132.883	Arahy.12	109557930		T	T	T	T	T	N	T	T	N	T	T	N	N	T	N	H	T	N	T	N	N	T	N	T	N	T	N	H	T	T	N	N	T	T	N	H	H	N	T	T	H	N
B02	AX-147214880	AX-147214880_B02		140.572	Arahy.12	111136933		T	T	T	T	T	N	T	T	N	T	T	N	T	T	N	H	T	T	T	N	N	T	T	T	N	T	N	N	N	T	N	N	T	T	T	N	N	N	T	T	-	N
B02	AX-147214881	AX-147214881_B02		141.822	Arahy.12	111136991		T	T	T	T	-	N	T	T	N	-	T	N	T	T	N	-	T	T	T	N	N	T	T	T	N	T	N	N	N	T	N	N	T	T	T	N	N	N	T	-	N	N
B02	AX-147214879	AX-147214879_B02		142.252	Arahy.12	111136811		T	T	T	T	T	N	T	T	N	T	T	N	T	T	N	N	T	T	T	N	N	T	T	T	N	T	N	N	N	T	N	N	T	T	T	N	N	N	T	T	N	N
B02	AX-147214882	AX-147214882_B02		144.502	Arahy.12	111137310		T	T	T	T	T	N	T	T	N	T	T	N	T	T	N	H	T	T	T	N	N	T	T	T	N	T	N	N	N	T	N	N	T	T	T	H	H	N	T	T	-	N
B02	AX-147214883	AX-147214883_B02		145.384	Arahy.12	111137680		T	T	T	T	T	N	T	T	N	T	T	N	T	T	N	H	T	T	T	N	N	T	T	T	N	T	N	N	N	T	N	N	T	T	T	-	H	N	T	T	H	N
B02	AX-147242327	AX-147242327_B02		147.677	Arahy.12	111485705		T	T	T	T	T	N	T	T	N	T	T	N	T	T	N	-	N	T	T	N	N	T	T	T	N	T	N	N	N	T	N	N	T	T	T	N	H	N	T	T	H	N
B02	AX-147214931	AX-147214931_B02		150.486	Arahy.12	112155143		T	T	T	T	T	N	T	T	N	N	T	N	T	-	N	-	N	T	T	N	N	T	T	T	N	T	N	N	N	T	N	N	T	T	T	N	T	N	T	T	H	N
B02	AX-147242529	AX-147242529_B02		159.192	Arahy.12	114733893		T	T	T	T	T	N	N	N	N	T	T	N	T	T	N	N	N	T	T	N	N	T	T	T	N	T	N	T	N	T	N	N	N	T	T	T	T	T	T	T	-	N
B02	AX-147242681	AX-147242681_B02		170.04	Arahy.12	116584242		N	N	T	T	T	T	N	N	N	T	T	N	N	N	N	T	N	T	T	N	N	T	T	T	N	T	N	T	N	T	N	N	N	T	T	T	T	T	N	T	N	N
B02	AX-147242757	AX-147242757_B02		176.118	Arahy.12	117470173		N	N	T	T	T	T	N	N	N	T	T	N	N	T	N	-	N	T	T	N	N	N	T	T	N	T	N	T	T	T	N	N	N	T	T	T	T	T	N	T	N	N
B02	AX-147215190	AX-147215190_B02		183.878	Arahy.12	117847569		N	N	T	T	T	T	N	N	N	T	N	N	T	T	N	-	N	T	T	N	N	N	T	T	N	T	N	T	T	T	N	T	N	T	T	T	T	T	N	T	N	N
B02	AX-147215203	AX-147215203_B02		184.559	Arahy.12	118135943		N	N	T	T	T	T	N	N	N	T	N	N	T	T	N	T	N	T	T	N	N	N	T	T	N	T	N	T	T	T	N	T	N	T	T	T	T	T	N	T	N	N
B02	AX-147215189	AX-147215189_B02		184.9	Arahy.12	117847417		N	N	T	T	T	T	N	N	-	T	N	N	T	T	N	T	-	T	T	N	N	N	T	T	N	T	N	T	T	T	N	T	N	T	T	T	T	T	N	T	N	N
B02	AX-147215164	AX-147215164_B02		185.696	Arahy.12	117688481		N	N	T	T	T	T	N	N	N	T	N	N	T	T	N	H	N	T	T	N	N	N	T	T	N	T	N	T	T	T	N	T	N	T	T	T	T	T	N	T	N	N
B02	AX-147215194	AX-147215194_A02		186.034	Arahy.12	117848701		N	N	T	T	T	T	N	N	N	T	N	N	T	T	N	H	N	T	T	N	N	N	T	T	N	T	N	T	T	T	N	T	N	T	T	T	T	T	N	T	N	N
B02	AX-147215204	AX-147215204_B02		186.497	Arahy.12	118136268		N	N	T	T	T	T	N	N	N	T	N	N	T	T	N	H	N	T	T	N	N	N	T	T	N	T	N	T	T	T	N	T	N	T	T	T	T	T	N	T	N	N
B02	AX-147215206	AX-147215206_B02		186.567	Arahy.12	118241439		N	N	T	T	T	T	N	N	N	T	N	N	T	T	N	H	N	T	T	N	N	N	T	T	N	T	N	T	T	T	N	T	N	T	T	T	T	T	N	T	N	N
B02	AX-147242786	AX-147242786_A02		186.567	Arahy.12	117841611		N	N	T	T	T	T	N	N	-	T	N	N	T	T	N	H	N	T	T	N	N	N	T	T	N	T	N	T	T	T	N	T	N	T	T	T	T	T	N	T	N	N
B02	AX-147215198	AX-147215198_B02		186.581	Arahy.12	117893083		N	N	T	T	T	T	N	N	N	T	N	N	T	T	N	H	N	T	T	N	N	N	T	T	N	T	N	T	T	T	N	T	N	T	T	T	T	T	N	T	N	N
B02	AX-147215188	AX-147215188_B02		186.886	Arahy.12	117847310		N	N	T	T	T	T	N	N	N	T	N	N	T	T	N	H	N	T	T	N	N	N	T	T	N	T	N	T	T	T	N	T	N	T	T	T	T	T	N	T	N	N
B02	AX-147215185	AX-147215185_B02		186.897	Arahy.12	117842230
B02	AX-147242778	AX-147242778_B02		187.14	Arahy.12	117747999		N	N	T	T	T	T	N	N	N	T	N	N	T	T	N	H	N	T	T	N	N	N	T	T	N	T	N	T	T	T	N	T	N	T	T	T	T	T	N	T	N	N
B02	AX-147215186	AX-147215186_A02		187.391	Arahy.12	117846829		N	N	T	T	T	T	N	N	N	T	N	N	T	T	N	H	N	T	T	N	N	N	T	T	N	T	N	T	T	T	N	T	N	T	T	T	T	T	N	T	N	N
B02	AX-147215193	AX-147215193_A02		187.556	Arahy.12	117848306		N	N	T	T	T	T	N	N	-	T	N	N	T	T	N	H	N	T	T	N	N	N	T	T	N	T	N	T	T	T	N	T	N	T	T	T	T	T	N	T	N	N
B02	AX-147215163	AX-147215163_B02		187.956	Arahy.12	117688453		N	N	T	T	T	T	N	N	N	T	N	N	T	T	N	T	N	T	T	N	N	N	T	T	N	T	N	T	T	T	N	T	N	T	T	T	T	T	N	T	N	N
B02	AX-147242776	AX-147242776_B02		188.664	Arahy.12	117696463		N	N	T	T	T	T	N	N	N	T	N	N	T	T	N	T	N	T	T	N	N	N	T	T	N	T	N	T	T	T	N	T	N	T	T	T	T	T	N	T	N	N
B02	AX-147214052	AX-147214052_B02		189.123	Arahy.12	117946911		N	N	T	T	T	T	N	N	N	T	N	N	T	T	N	T	N	T	T	N	N	N	T	T	N	T	N	T	T	T	N	T	N	T	T	T	T	T	N	T	N	N
B02	AX-147242777	AX-147242777_B02		190.767	Arahy.12	117722707		N	N	T	T	T	T	N	N	N	T	N	N	T	T	N	N	N	T	T	N	N	N	T	T	N	T	N	T	T	T	N	T	N	T	T	T	T	T	N	T	N	N
B02	AX-147215192	AX-147215192_B02		192.467	Arahy.12	117847885		N	N	T	T	T	-	N	N	N	T	N	N	T	-	-	-	N	T	T	N	N	N	T	T	N	T	N	T	T	T	N	T	N	T	T	-	T	T	N	-	N	N
B02	AX-147215197	AX-147215197_A02		192.484				N	N	T	T	T	T	N	N	N	T	N	N	T	T	N	N	N	T	T	N	N	N	T	T	N	T	N	T	T	T	N	T	N	T	T	T	T	T	N	T	-	N
B02	AX-147242650	AX-147242650_B02		202.012	Arahy.12	116259123
B02	AX-147242449	AX-147242449_B02		210.84	Arahy.12	113407646		T	T	T	T	T	N	N	N	N	T	T	N	T	T	N	N	N	T	T	N	N	T	T	T	N	T	N	N	N	T	N	T	T	T	T	T	T	T	T	T	-	N
B02	AX-147242339	AX-147242339_B02		218.443	Arahy.12	111794009		T	T	T	T	T	N	T	-	N	T	T	N	T	T	N	T	-	T	T	N	N	T	T	T	N	T	N	-	N	T	N	T	T	T	T	N	T	N	T	T	-	N
B02	AX-147242313	AX-147242313_B02		221.775	Arahy.12	111029354		T	T	T	T	T	N	T	T	N	T	T	N	T	T	N	T	T	T	T	N	N	T	T	T	N	T	N	N	N	T	N	T	T	T	T	N	T	N	T	T	N	N
B02	AX-147242303	AX-147242303_B02		223.659	Arahy.12	111009449		T	T	T	T	T	N	T	T	N	T	T	N	T	T	N	H	T	T	T	N	N	T	T	T	N	T	N	N	N	T	N	T	T	T	T	H	H	N	T	T	H	N
B02	AX-147242316	AX-147242316_B02		223.824	Arahy.12	111187268		T	T	T	T	T	N	T	T	N	T	T	N	T	T	N	H	T	T	T	N	N	T	T	T	N	T	N	N	N	T	N	T	T	T	T	-	H	N	T	T	H	N
B02	AX-147214849	AX-147214849_B02		225.04	Arahy.12	110036574		T	T	T	T	T	N	T	T	N	T	T	N	T	T	N	H	T	N	T	N	N	T	T	T	N	T	N	H	N	T	N	T	T	T	T	H	H	N	T	T	H	N
B03	AX-147243094	AX-147243094_B03		0	Arahy.13	2665709		N	T	N	T	N	T	T	T	N	N	T	N	T	N	N	T	N	T	T	N	T	T	N	N	N	N	N	N	T	N	N	T	T	T	T	T	H	T	N	T	N	T
B03	AX-147242987	AX-147242987_B03		6.145	Arahy.13	1805895		N	T	N	T	N	T	H	T	N	N	T	H	T	N	N	T	N	T	T	N	T	T	N	N	T	N	N	N	T	N	N	T	T	N	T	T	H	H	N	T	T	T
B03	AX-147231982	AX-147231982_A08		11.786	Arahy.13	1310472		N	T	N	T	N	T	N	T	N	N	T	-	T	N	N	T	N	T	T	N	T	T	N	-	T	T	N	N	T	N	N	T	T	N	T	T	T	T	N	T	-	T
B03	AX-147242909	AX-147242909_B03		24.43	Arahy.13	657862		N	N	N	T	N	T	N	T	N	N	T	T	T	N	N	T	N	T	T	N	T	T	T	N	T	T	N	N	T	-	N	T	T	N	T	T	T	T	N	T	T	T
B03	AX-147243171	AX-147243171_B03		36.243	Arahy.13	3684400		T	T	N	T	N	T	T	N	N	N	T	N	N	N	N	T	N	T	T	T	T	T	N	N	N	N	N	N	T	N	N	T	T	T	T	T	N	T	N	T	N	T
B03	AX-147215424	AX-147215424_A03		37.983	Arahy.13	4053483		T	T	N	T	N	T	T	N	N	N	T	N	T	N	N	T	N	T	T	T	T	T	N	N	N	N	N	N	T	N	N	T	T	T	T	T	-	T	N	T	N	T
B03	AX-147243248	AX-147243248_B03		48.482	Arahy.13	4855279		T	T	N	T	T	T	T	N	N	H	N	T	N	N	N	T	N	T	N	T	T	T	T	N	N	N	N	N	T	N	N	T	T	T	T	T	H	H	N	T	T	T
B03	AX-147243309	AX-147243309_B03		59.652	Arahy.13	5970381		T	T	N	T	T	T	T	T	N	N	N	T	H	N	N	T	N	T	N	T	T	T	T	T	N	N	N	N	T	N	N	T	T	T	T	T	N	H	N	N	H	T
B03	AX-147243327	AX-147243327_B03		61.741	Arahy.13	6116831		T	T	N	N	T	T	T	T	N	N	N	T	H	N	N	T	N	T	N	T	T	T	T	T	N	N	N	N	T	N	N	T	T	T	T	N	N	H	N	N	H	T
B03	AX-147243307	AX-147243307_B03		64.976	Arahy.13	5916320		T	T	N	T	T	T	T	T	N	N	N	T	T	N	N	T	N	T	N	T	T	T	T	T	N	N	N	N	T	N	N	T	T	T	T	T	N	H	N	N	H	T
B03	AX-147243289	AX-147243289_B03		72.714	Arahy.13	5567199		T	T	N	T	T	T	T	T	N	N	N	T	T	N	N	T	N	T	N	T	T	T	T	N	N	N	N	N	T	N	N	N	T	T	T	T	N	H	N	N	H	T
B03	AX-147243365	AX-147243365_B03		80.968	Arahy.13	6535112		T	T	N	N	T	T	T	T	N	N	N	T	H	H	N	T	N	T	N	T	T	N	T	T	N	N	N	N	T	N	N	N	T	T	T	N	N	H	N	N	H	T
B03	AX-147243401	AX-147243401_B03		83.264	Arahy.13	7101275		T	T	N	N	T	T	T	T	N	N	N	N	H	H	N	-	N	T	N	T	T	N	T	T	N	N	N	N	T	N	N	N	T	T	T	N	N	H	N	N	H	T
B03	AX-147215670	AX-147215670_A03		94.409	Arahy.13	8435293		T	T	N	N	N	T	T	T	N	N	N	N	T	T	N	N	N	T	N	T	T	N	T	T	N	N	N	N	T	N	N	T	N	T	T	N	N	-	N	N	H	T
B03	AX-147243469	AX-147243469_B03		95.105	Arahy.13	8399581		T	T	N	N	N	T	T	T	N	N	N	N	T	T	N	N	N	T	N	T	T	N	-	T	N	N	N	N	T	N	N	T	-	T	T	N	N	-	N	N	N	T
B03	AX-147215668	AX-147215668_B03		96.645	Arahy.13	8434570		T	T	N	N	N	T	T	T	N	-	N	N	T	T	N	-	N	T	T	T	T	N	T	T	N	N	N	N	T	N	N	T	N	T	T	N	N	N	N	N	H	T
B03	AX-147215667	AX-147215667_B03		98.003	Arahy.13	8434532		T	T	N	N	N	T	T	T	N	N	N	N	T	T	N	T	N	T	T	T	T	N	T	T	N	N	N	N	T	N	N	T	N	T	T	N	N	-	N	N	T	T
B03	AX-147243471	AX-147243471_B03		99.203	Arahy.13	8465256		T	T	N	-	N	T	T	T	N	N	N	N	-	T	N	T	-	T	-	T	T	N	T	T	N	N	N	N	-	N	N	T	N	T	T	N	N	-	N	N	T	T
B03	AX-147213849	AX-147213849_A02		110.17	Arahy.13	10881105		T	T	N	N	N	N	T	T	N	T	N	N	T	N	N	T	T	T	-	T	T	N	T	T	N	T	N	T	T	T	N	T	T	T	T	N	N	-	N	T	-	T
B03	AX-147215765	AX-147215765_B03		117.49	Arahy.13	10694403		T	T	N	N	N	N	T	T	H	T	-	N	T	N	N	T	T	T	H	T	T	N	T	T	N	T	N	T	T	T	-	T	T	T	T	N	N	H	N	T	N	T
B04	AX-147246366	AX-147246366_B04		0	Arahy.14	329367		T	T	N	N	N	T	N	N	T	T	T	T	N	T	T	T	T	T	N	N	N	T	-	N	T	T	T	T	T	T	T	H	T	T	T	T	N	N	T	T	T	N
B04	AX-147218791	AX-147218791_B04		2.489	Arahy.14	793734		T	T	N	N	N	T	N	N	T	T	T	T	N	T	T	T	T	T	N	N	N	T	N	N	T	T	T	T	T	T	T	T	T	T	T	T	N	N	T	T	T	N
B04	AX-147246465	AX-147246465_B04		7.8	Arahy.14	1285927		T	-	N	N	N	T	N	-	T	T	T	T	-	T	T	T	H	T	N	N	N	T	N	N	T	T	T	T	T	T	T	T	T	T	T	T	N	N	T	T	T	N
B04	AX-147246491	AX-147246491_B04		10.972	Arahy.14	1505275		T	H	N	N	N	T	N	N	T	T	T	T	N	T	T	T	T	T	T	N	N	T	N	N	T	T	T	T	T	T	T	T	T	T	T	T	N	N	T	T	T	N
B04	AX-147246428	AX-147246428_B04		14.2	Arahy.14	864339		T	H	N	N	N	T	N	N	T	T	T	T	N	T	T	T	T	T	N	N	N	T	N	N	T	T	T	T	T	T	T	T	T	T	T	T	N	N	T	T	T	N
B04	AX-147246440	AX-147246440_B04		19.23	Arahy.14	995771		T	T	N	N	N	T	N	N	T	T	T	T	N	T	T	T	T	T	N	N	N	T	N	N	T	T	T	T	T	T	T	T	T	T	T	T	N	N	T	T	T	N
B04	AX-147218134	AX-147218134_B04		32.314	Arahy.14	3018095		T	N	N	T	N	T	N	N	N	T	N	T	N	T	T	T	N	T	T	N	N	T	N	T	N	N	T	N	T	N	T	T	T	T	T	T	N	N	T	T	T	T
B04	GM99	Ah2TC11H06		40.08	Arahy.14	3631106		T	N	N	T	N	T	N	N	N	T	N	T	N	T	T	T	N	T	T	N	N	T	N	T	-	N	T	N	T	N	T	T	N	T	T	T	N	N	T	T	T	T
B04	AX-147238610	AX-147238610_B01		54.928	Arahy.14	5123894
B04	AX-147219125	AX-147219125_B04		55.903	Arahy.14	4989057		T	N	N	T	N	T	N	N	N	N	N	T	N	T	N	T	N	T	T	N	N	T	T	T	N	N	T	N	T	N	T	T	N	N	T	N	N	N	T	T	T	N
B04	AX-147246778	AX-147246778_B04		56.536	Arahy.14	4766896
B04	AX-147246787	AX-147246787_B04		57.658	Arahy.14	4889818		T	N	N	T	N	T	N	N	N	N	N	T	N	T	N	T	N	T	T	N	N	T	T	T	N	N	T	N	T	N	T	T	N	N	T	N	N	N	T	T	T	N
B04	AX-147219260	AX-147219260_B04		73.498	Arahy.14	8355889		T	N	N	N	N	T	N	N	T	N	T	T	N	N	T	N	N	N	T	T	N	T	N	T	N	N	N	N	T	N	N	N	N	N	N	N	N	N	T	T	N	N
B04	AX-147247006	AX-147247006_B04		76.778	Arahy.14	8988346		T	N	N	N	N	T	N	N	T	N	T	T	N	N	T	N	N	N	T	T	N	T	H	T	N	N	N	N	T	N	H	N	N	N	N	N	N	N	T	T	H	N
B04	AX-147247052	AX-147247052_B04		79.153	Arahy.14	10204717		T	N	N	N	N	T	N	N	T	N	T	T	N	N	T	N	N	N	T	T	N	T	-	N	N	N	N	N	T	N	H	N	N	N	N	N	N	N	-	-	H	N
B04	AX-147247121	AX-147247121_B04		83.492	Arahy.14	11836538		N	T	N	N	N	T	N	N	T	N	T	T	N	N	T	N	N	N	T	T	N	T	T	N	N	N	N	N	T	N	T	N	N	N	T	N	N	N	T	T	H	N
B04	AX-147247117	AX-147247117_B04		85.056	Arahy.14	11699480		N	T	N	N	N	T	N	N	T	N	T	T	N	N	T	N	N	N	T	T	N	T	H	N	N	N	N	N	T	N	H	N	N	N	T	N	N	H	T	T	N	N
B04	AX-147247106	AX-147247106_B04		85.304	Arahy.14	11301534		N	T	N	N	N	T	N	N	T	N	T	T	N	N	T	N	N	N	T	T	N	T	H	N	N	N	N	N	T	N	H	N	N	N	T	N	N	H	T	T	-	N
B04	AX-147247094	AX-147247094_B04		85.746	Arahy.14	11174789		N	T	N	N	N	T	N	N	T	N	T	T	N	N	T	N	N	N	T	T	N	T	H	N	N	N	N	N	T	N	H	H	N	N	T	N	N	H	T	T	H	N
B04	AX-147219455	AX-147219455_A04		86.932	Arahy.14	12077454		N	T	N	N	N	T	N	N	T	N	T	T	N	N	T	N	N	N	T	T	N	T	T	N	N	N	N	N	N	N	H	H	N	N	T	N	N	H	T	T	H	N
B04	AX-147215107	AX-147215107_B04		88.296	Arahy.14	13316598		N	T	N	N	N	T	N	N	T	N	T	T	N	N	T	N	N	N	T	T	N	T	H	N	N	N	N	N	N	N	H	N	N	N	T	N	N	H	T	T	H	N
B04	AX-147247139	AX-147247139_B04		89.659	Arahy.14	13408315		N	T	N	N	N	T	N	N	T	N	T	T	N	N	T	N	N	N	T	T	N	T	T	N	N	N	N	N	N	N	N	N	N	N	T	N	N	N	T	T	N	N
B04	AX-147247216	AX-147247216_B04		91.928	Arahy.14	15714986		N	T	N	N	N	T	N	N	T	N	T	T	N	N	T	N	N	N	T	T	N	-	N	N	N	N	N	N	N	N	H	N	N	N	T	N	N	T	T	T	H	N
B04	AX-147247233	AX-147247233_B04		93.576
B04	AX-147247229	AX-147247229_B04		94.669	Arahy.14	15932780		N	T	N	N	N	T	N	N	T	N	T	T	N	N	T	N	N	N	T	T	N	T	N	N	N	N	N	N	N	N	N	N	N	N	T	N	N	T	T	T	N	N
B04	AX-147247263	AX-147247263_B04		98.691	Arahy.14	17302839		N	T	N	N	N	T	N	N	T	N	T	T	N	N	T	N	N	N	T	T	N	T	N	N	N	N	N	N	N	N	H	N	N	N	T	N	N	T	T	T	N	N
B04	AX-147247278	AX-147247278_B04		99.632	Arahy.14	18156884		N	T	N	N	N	N	N	N	T	N	T	T	N	N	T	H	N	N	T	T	N	T	N	N	N	N	N	N	N	N	H	-	N	N	T	N	N	T	T	T	H	N
B04	AX-147247277	AX-147247277_B04		100.417	Arahy.14	18098147		N	T	N	N	N	N	N	N	T	N	T	T	N	N	T	N	N	N	T	T	N	T	N	N	N	N	N	N	N	N	N	N	N	N	T	N	N	T	T	T	N	N
B04	AX-147247309	AX-147247309_B04		102.275	Arahy.14	18551209		N	T	N	N	N	N	N	N	T	N	T	T	N	N	T	T	N	N	T	T	N	T	N	N	N	N	N	N	N	N	T	N	N	N	T	N	N	T	T	T	N	N
B04	AX-147247290	AX-147247290_B04		103.114	Arahy.14	18415759		N	T	N	N	N	N	N	N	T	N	T	T	N	N	T	H	N	N	T	T	N	T	N	N	N	N	N	N	N	N	H	N	N	N	T	N	N	T	T	T	N	N
B04	AX-147219692	AX-147219692_B04		103.444	Arahy.14	21893005		N	T	N	N	N	N	N	N	T	N	N	T	N	N	T	H	N	N	T	T	N	T	N	N	N	N	N	N	N	N	H	N	N	N	T	N	N	T	T	T	N	N
B04	AX-147247329	AX-147247329_B04		103.609	Arahy.14	20446682		N	T	N	N	N	N	N	N	T	N	N	T	N	N	T	H	N	N	T	T	N	T	N	N	N	N	N	N	N	N	H	N	N	N	T	N	N	T	T	T	H	N
B04	AX-147247356	AX-147247356_B04		103.844	Arahy.14	21535659		N	T	N	N	N	N	N	N	T	N	N	T	N	N	T	N	N	N	T	T	N	T	N	N	N	N	N	N	N	N	H	N	N	N	T	N	N	T	T	T	-	N
B04	AX-147247376	AX-147247376_B04		104.153	Arahy.14	22068531		N	T	N	N	N	N	N	N	T	N	N	T	N	N	T	H	N	N	T	T	N	T	N	N	N	N	N	N	N	N	H	N	N	N	T	N	N	T	T	T	H	N
B04	AX-147247384	AX-147247384_B04		104.576	Arahy.14	22267284		N	T	N	N	N	N	N	N	T	N	N	T	N	N	T	H	N	N	T	T	N	T	N	N	N	N	N	N	N	N	H	N	N	N	T	N	N	T	T	T	H	N
B04	AX-147247733	AX-147247733_B04		106.253	Arahy.14	90489324		N	T	N	N	N	N	N	N	N	N	N	T	N	N	T	H	N	N	T	T	N	T	N	N	N	N	N	N	N	N	H	N	N	N	T	T	N	T	T	T	H	-
B04	GM532a	pPGSseq14D11		106.651				-	T	N	N	N	N	N	N	N	N	N	T	N	N	T	H	N	-	T	T	N	T	N	N	-	N	N	N	N	N	H	N	N	N	T	T	N	T	T	T	H	T
B04	AX-147221896	AX-147221896_B04		106.654	Arahy.14	62385158		N	T	N	N	N	N	N	N	N	N	N	T	N	N	T	H	N	N	T	T	N	T	N	N	N	N	N	N	N	N	H	N	N	N	T	T	N	T	T	T	H	-
B04	AX-147247621	AX-147247621_B04		107.091	Arahy.14	48331508		N	T	N	N	N	N	N	N	N	N	N	T	N	N	T	H	N	N	T	T	N	T	N	N	N	N	N	N	N	N	H	N	N	N	T	T	N	T	T	T	-	H
B04	AX-147247765	AX-147247765_B04		107.157	Arahy.14	81324363		N	T	N	N	N	N	N	N	N	N	N	T	N	N	T	H	N	N	T	T	N	T	N	N	N	N	N	N	N	N	H	N	N	N	T	T	N	T	T	T	N	H
B04	AX-147217587	AX-147217587_B04		107.568	Arahy.14	47250388		N	T	N	N	N	N	N	N	N	N	N	T	N	N	T	N	N	N	T	T	N	T	N	N	N	N	N	N	N	N	H	N	N	N	T	T	N	T	T	T	-	H
B04	AX-147247775	AX-147247775_B04		108.59	Arahy.14	98833136		N	T	N	N	N	N	N	N	N	N	N	T	N	N	T	N	N	N	T	T	N	T	N	N	N	N	N	N	N	N	H	N	N	N	T	T	N	T	T	T	N	H
B04	AX-147221612	AX-147221612_B04		109.719				N	T	N	N	N	N	N	N	N	N	N	T	N	N	T	N	N	N	T	T	N	T	N	N	N	N	N	N	N	N	H	N	N	N	T	T	N	T	T	T	N	H
B04	AX-147221610	AX-147221610_B04		110.384				N	T	N	N	N	N	N	N	N	N	N	T	N	N	T	N	N	N	T	T	N	T	N	N	N	N	N	N	N	N	H	N	N	N	T	T	N	T	T	T	N	H
B04	AX-147218355	AX-147218355_B03		111.857				N	T	N	N	N	N	N	N	N	N	N	T	N	N	T	N	N	N	T	T	N	T	N	N	N	N	N	N	N	N	N	N	N	N	T	T	N	T	T	T	N	N
B04	AX-147220032	AX-147220032_B04		112.569				N	T	N	N	N	N	N	N	N	N	N	T	N	N	T	-	N	N	T	T	N	T	N	N	N	N	N	N	N	N	N	N	N	N	T	T	N	T	T	T	N	N
B04	AX-147218354	AX-147218354_B04		112.923	Arahy.14	139559492		N	T	N	N	N	N	N	N	N	N	N	T	N	N	T	N	N	N	T	T	N	T	N	N	N	N	N	N	N	N	-	N	N	N	T	T	N	T	T	T	N	T
B04	AX-147222027	AX-147222027_B04		112.923	Arahy.14	36562579		N	T	N	N	N	N	N	N	N	N	N	T	N	N	T	N	N	N	T	T	N	T	N	N	N	N	N	N	N	N	N	N	N	N	T	T	N	T	T	T	N	T
B04	AX-147221613	AX-147221613_B04		112.925				N	T	N	N	N	N	N	N	N	N	N	T	N	N	T	N	N	N	T	T	N	T	N	N	N	N	N	N	N	N	N	N	N	N	T	T	N	T	T	T	N	T
B04	AX-147221615	AX-147221615_B04		112.93				N	T	N	N	N	N	N	N	N	N	N	T	N	N	T	N	N	N	T	T	N	T	N	N	N	N	N	N	N	N	N	N	N	N	T	T	N	-	T	T	N	T
B04	AX-147221614	AX-147221614_A05		113.937				N	T	N	N	N	N	N	N	-	N	N	T	N	N	T	-	N	N	T	T	N	T	N	N	N	N	N	N	N	N	N	T	N	N	T	T	N	T	T	T	N	T
B04	AX-147221611	AX-147221611_B04		114.952				N	T	N	N	N	N	N	N	N	N	N	T	N	N	T	N	N	N	T	T	N	T	N	N	N	N	N	N	N	N	N	N	N	N	T	T	N	T	T	T	N	-
B04	GM2589	GM2589_a04-b04	GO340406.1	115.62				N	T	N	N	N	-	N	N	N	N	N	T	-	N	T	N	N	-	-	T	N	N	N	N	-	N	N	N	-	N	N	N	N	N	T	T	-	T	T	T	-	T
B04	AX-147220002	AX-147220002_A04		116.63	Arahy.14	43025177		N	T	N	N	N	N	N	N	N	N	N	T	N	N	T	N	N	N	T	T	N	T	N	N	N	N	N	N	N	N	N	N	N	N	T	T	N	T	T	T	-	T
B04	AX-147219984	AX-147219984_B01		117.523	Arahy.14	41097507
B04	AX-147247613	AX-147247613_B04		118.309	Arahy.14	45363988		N	T	N	N	N	N	N	N	N	N	N	T	N	N	T	T	N	N	T	T	N	T	N	N	N	N	N	N	N	N	T	N	N	N	T	T	N	T	T	T	N	T
B04	AX-147219981	AX-147219981_B04		118.309	Arahy.14	41096802		N	T	N	N	N	N	N	N	N	N	N	T	N	N	T	T	N	N	T	T	N	T	N	N	N	N	N	N	N	N	T	N	N	N	T	T	N	T	T	T	N	-
B04	AX-147219970	AX-147219970_B04		118.309	Arahy.14	41095027		N	T	N	N	N	N	N	N	N	N	N	T	N	N	T	T	N	N	T	T	N	T	N	N	N	N	N	N	N	N	T	N	N	N	T	T	N	T	T	T	N	T
B04	AX-147219989	AX-147219989_B01		119.466				N	T	N	N	N	N	T	N	N	N	T	T	-	N	T	T	N	N	T	T	N	T	N	N	N	N	N	N	N	-	-	N	N	N	N	T	N	T	T	T	-	T
B04	AX-147219977	AX-147219977_B04		121.011	Arahy.14	41096444
B04	AX-147218586	AX-147218586_A03		121.415	Arahy.14	62849078		N	T	N	N	N	N	N	N	N	N	N	T	N	N	T	N	N	N	T	T	N	T	N	N	N	N	N	N	N	N	T	N	N	N	T	T	N	T	-	T	-	T
B04	AX-147219988	AX-147219988_B01		121.701	Arahy.14	41097934		N	T	N	N	N	N	N	N	N	N	N	T	N	N	T	N	N	N	T	T	N	T	N	N	N	N	N	N	N	N	T	N	N	N	T	T	N	T	T	T	N	T
B04	AX-147224843	AX-147224843_B02		122.158	Arahy.14	92391008		N	T	N	N	N	N	N	N	N	N	N	T	N	N	T	N	N	N	T	T	N	T	N	N	N	N	N	N	N	N	T	N	N	N	T	T	N	T	T	T	N	T
B04	AX-147219990	AX-147219990_A04		122.983	Arahy.14	41098395		N	T	N	N	N	N	N	N	N	N	N	T	N	N	T	N	N	N	T	T	N	T	N	N	N	N	N	N	N	N	T	N	N	N	T	T	N	T	T	T	-	T
B04	AX-147247606	AX-147247606_A04		123.111				N	T	N	N	N	N	N	N	N	N	N	T	N	N	T	-	N	N	T	T	N	T	N	N	N	N	N	N	N	N	T	N	N	N	T	T	N	T	T	T	H	T
B04	AX-147247607	AX-147247607_A04		123.7	Arahy.14	43026748		N	T	N	N	N	N	N	N	N	N	N	T	N	N	T	T	N	N	T	T	N	T	N	N	N	N	N	N	N	N	T	N	N	N	T	T	N	T	T	T	N	T
B04	AX-147220003	AX-147220003_A04		124.367	Arahy.14	43025276		N	T	N	N	N	N	N	N	N	N	N	T	N	N	T	T	N	N	T	T	N	T	N	N	N	N	N	N	N	N	T	N	N	N	T	T	N	T	T	T	N	T
B04	AX-147220005	AX-147220005_B04		125.153	Arahy.14	43026377		N	T	N	N	N	N	N	N	N	N	N	T	N	N	T	H	N	N	T	T	N	T	N	N	N	N	N	N	N	N	T	N	N	N	T	T	N	T	T	T	H	T
B04	AX-147219982	AX-147219982_B04		125.474	Arahy.14	41096933		N	T	N	N	N	N	N	N	N	N	N	T	N	N	T	H	N	N	T	T	N	T	N	N	N	N	N	N	N	N	T	N	N	N	T	T	N	T	T	T	H	T
B04	AX-147219972	AX-147219972_A04		125.671	Arahy.14	41095726		N	T	N	N	N	N	N	N	N	N	N	T	N	N	T	H	N	N	T	T	N	T	N	N	N	N	N	N	N	N	-	N	N	N	T	T	N	T	T	T	H	T
B04	AX-147219974	AX-147219974_B04		125.702	Arahy.14	41095929		N	T	N	N	N	N	N	N	N	N	N	T	N	N	T	H	N	N	T	T	N	T	N	N	N	N	N	N	N	N	H	N	N	N	T	T	N	T	T	T	H	T
B04	AX-147247592	AX-147247592_B04		126.172	Arahy.14	39139701		N	T	N	N	N	N	N	N	N	N	N	T	N	N	T	H	N	N	T	T	N	T	N	N	N	N	N	N	N	N	H	N	N	N	T	T	N	T	T	T	-	T
B04	AX-147219973	AX-147219973_A04		126.84	Arahy.14	41095846		N	T	N	N	N	N	N	N	N	N	N	T	N	N	T	H	N	N	T	T	N	T	N	N	N	N	N	N	N	N	-	N	N	N	T	T	N	T	T	T	H	-
B04	AX-147219980	AX-147219980_B04		127.041	Arahy.14	41096778		N	T	N	N	N	N	N	N	N	N	N	T	N	N	T	H	N	N	T	T	N	T	N	N	N	N	N	N	N	N	T	N	N	N	T	T	N	T	T	T	H	T
B04	AX-147219979	AX-147219979_B04		127.041	Arahy.14	41096517		N	T	N	N	N	N	N	N	N	N	N	T	N	N	T	H	N	N	T	T	N	T	N	N	N	N	N	N	N	N	T	N	N	N	T	T	N	T	T	T	H	T
B04	GM532b	pPGSseq14D11		127.932				-	T	N	N	N	N	N	N	N	N	N	T	-	N	T	T	N	-	T	T	N	T	N	N	-	N	N	N	N	N	H	N	N	N	T	T	N	T	T	T	T	H
B04	AX-147220004	AX-147220004_B04		130.266	Arahy.14	43026222		N	T	N	H	N	N	N	N	N	N	N	T	N	-	T	T	N	N	T	T	N	T	N	N	N	N	N	N	N	H	T	N	N	N	T	T	N	T	T	T	T	T
B04	AX-147220274	AX-147220274_B04		132.926	Arahy.14	102028796
B04	AX-147247853	AX-147247853_B04		138.391	Arahy.14	106275751		N	T	N	N	N	N	N	N	N	N	N	T	N	N	T	T	N	N	T	T	N	T	N	N	N	N	N	N	N	N	N	T	N	N	T	T	N	N	T	T	N	T
B04	AX-147247797	AX-147247797_A04		143.846	Arahy.14	102027591		N	T	N	N	-	N	N	N	N	N	N	T	N	N	T	H	N	N	T	T	N	T	N	N	N	N	N	N	N	N	H	-	N	N	T	T	N	H	T	T	H	T
B04	AX-147220276	AX-147220276_B04		144.461	Arahy.14	102032202		N	T	N	N	N	N	N	N	N	N	N	T	N	N	T	H	N	N	T	T	N	T	N	N	N	N	N	N	N	N	-	N	N	N	T	T	N	H	T	T	H	T
B04	AX-147220351	AX-147220351_B04		146.418	Arahy.14	110114591		N	T	N	N	N	N	N	N	N	N	N	T	N	N	T	H	N	N	T	T	N	T	T	N	N	N	N	N	N	N	T	N	N	N	T	T	N	N	T	T	T	T
B04	AX-147247842	AX-147247842_B04		147.875	Arahy.14	105749305		N	T	N	N	N	N	N	N	N	N	N	T	N	N	T	-	N	N	T	T	N	T	H	N	N	N	N	N	N	N	H	N	N	N	T	T	N	N	T	T	H	T
B04	AX-147247867	AX-147247867_B04		148.89	Arahy.14	108236128		N	T	N	N	N	N	N	N	N	N	N	T	N	N	T	H	N	N	T	T	N	T	H	N	N	N	N	N	N	N	H	N	N	N	T	T	N	N	T	T	H	H
B04	AX-147247871	AX-147247871_B04		149.903	Arahy.14	108973047		N	T	N	N	N	N	N	N	N	N	N	T	N	N	T	N	N	N	T	T	N	T	-	N	N	N	N	N	N	N	-	N	N	N	T	T	N	N	T	T	N	H
B04	AX-147247913	AX-147247913_B04		151.205	Arahy.14	110995840		N	T	N	N	N	N	N	N	N	N	N	T	N	N	T	-	N	N	T	T	N	T	-	N	N	N	N	N	N	N	H	N	N	N	N	T	N	N	T	T	N	H
B04	AX-147247945	AX-147247945_B04		152.295	Arahy.14	112907990		T	T	N	N	N	N	N	N	N	N	N	T	N	N	T	H	N	N	T	T	N	T	H	N	N	N	N	N	N	N	H	N	N	N	N	T	N	N	T	T	H	N
B04	AX-147220398	AX-147220398_A04		152.794	Arahy.14	114720873		T	T	N	N	N	N	N	N	N	N	N	T	N	N	T	H	N	N	T	T	N	T	H	N	N	N	N	N	N	N	-	N	N	N	N	T	N	N	T	-	H	N
B04	AX-147247970	AX-147247970_B04		153.959	Arahy.14	115908376
B04	AX-147247982	AX-147247982_B04		155.865	Arahy.14	117629535		T	T	N	N	N	N	T	T	N	N	N	T	N	N	T	N	N	N	T	T	N	T	-	N	N	N	N	N	N	N	T	N	N	N	N	T	N	N	T	T	H	N
B04	AX-147232752	AX-147232752_B04		157.469	Arahy.14	118638135		T	T	N	N	N	N	T	T	N	N	N	T	N	N	T	N	N	N	T	T	N	T	N	N	N	N	N	N	N	N	N	N	N	N	N	T	N	N	T	T	T	N
B04	AX-147248004	AX-147248004_B06		159.727
B04	AX-147223166	AX-147223166_B04		160.574	Arahy.14	118552535		T	T	N	N	N	N	T	T	N	N	N	T	N	N	T	-	N	N	T	T	N	T	H	N	N	N	N	N	N	N	T	N	N	N	N	T	N	N	T	T	H	N
B04	AX-147232753	AX-147232753_A09		161.241	Arahy.14	118636828		T	T	N	N	N	N	T	T	N	N	N	T	N	N	T	T	N	N	T	T	N	T	H	N	N	N	N	N	N	N	T	N	N	N	N	T	N	N	T	T	H	N
B04	AX-147260472	AX-147260472_B04		161.803	Arahy.14	118638018		T	T	N	N	N	N	T	T	N	N	N	T	N	N	T	N	N	N	T	T	N	T	H	N	N	N	N	N	N	N	T	N	N	N	N	T	N	N	-	T	H	N
B04	AX-147226070	AX-147226070_B04		162.722	Arahy.14	118556597		T	T	N	N	N	N	T	T	N	N	N	T	N	N	T	N	N	N	T	T	N	T	T	N	N	N	N	N	N	N	T	N	N	N	N	T	N	N	-	-	T	N
B04	AX-147229761	AX-147229761_B04		164.835	Arahy.14	120554060		T	T	N	N	N	N	T	H	N	N	N	T	N	N	T	N	N	N	T	T	N	T	H	N	N	N	N	N	N	N	H	N	N	N	N	T	N	N	T	T	H	N
B04	AX-147248085	AX-147248085_B04		166.373	Arahy.14	121962325		T	T	N	N	N	N	T	H	N	N	N	T	N	N	T	N	N	N	T	T	T	T	N	N	N	N	N	T	N	N	H	N	N	N	N	T	N	H	T	T	H	N
B04	AX-147247516	AX-147247516_B04		168.127	Arahy.14	122600786		T	T	N	N	N	N	T	N	N	N	N	T	N	N	T	N	N	N	T	T	T	T	-	N	N	N	N	T	N	N	N	N	N	N	N	T	N	N	T	T	N	N
B04	AX-147248180	AX-147248180_B04		173.838	Arahy.14	125301483		T	T	N	N	N	N	T	H	N	N	N	T	N	N	T	T	N	N	T	T	T	T	H	N	N	N	N	T	N	N	T	T	N	N	N	T	N	H	N	T	H	N
B04	AX-147248192	AX-147248192_B04		174.703	Arahy.14	125745253		T	T	N	N	N	N	T	H	N	N	N	T	N	N	T	T	N	N	T	T	T	T	-	N	N	N	N	T	N	-	H	T	N	N	N	T	N	H	N	T	H	N
B04	AX-147248240	AX-147248240_B04		176.852	Arahy.14	126683544		T	T	N	N	N	N	T	H	N	N	N	T	N	N	T	T	N	N	N	T	T	T	-	N	N	N	N	T	N	N	N	H	N	N	N	T	T	H	N	T	H	N
B05	AX-147223942	AX-147223942_B05		0	Arahy.15	159626342		N	T	T	N	N	H	N	N	N	T	N	N	T	T	T	H	T	T	N	N	T	N	N	N	N	H	N	T	T	H	N	T	T	N	N	T	N	N	N	N	T	N
B05	GM1949	GM1949	EZ748146	2.644				-	T	T	N	N	H	N	N	N	T	N	N	H	T	T	H	T	-	N	N	T	N	N	N	-	H	N	T	T	H	N	T	T	N	N	T	N	N	N	N	T	N
B05	AX-147220482	AX-147220482_B05		6.145				N	T	T	N	N	N	N	N	N	-	N	N	N	T	-	N	-	T	N	N	T	N	N	N	N	N	N	T	-	N	T	T	T	N	N	T	N	N	N	N	T	N
B05	AX-147220484	AX-147220484_B05		6.543	Arahy.15	159242653		N	T	T	N	N	N	N	N	N	T	N	N	N	T	T	N	T	T	N	N	T	N	N	N	N	N	N	T	T	N	N	T	T	N	N	T	N	N	N	N	T	N
B05	AX-147251363	AX-147251363_B05		12.495	Arahy.15	159549316		N	T	T	N	N	-	N	N	N	T	N	N	N	T	T	T	T	T	N	N	T	N	N	N	N	N	N	T	T	N	N	T	T	N	N	T	N	N	N	N	T	N
B05	AX-147213682	AX-147213682_B05		17.432	Arahy.15	158591490		N	T	T	N	N	H	N	N	T	T	N	N	H	T	T	T	T	T	N	N	T	N	N	N	N	H	N	T	T	H	T	T	T	N	N	T	N	N	N	N	T	N
B05	AX-147251392	AX-147251392_B05		21.876	Arahy.15	159686951		N	T	T	N	N	T	N	N	N	T	N	N	T	T	T	T	T	T	N	N	T	N	N	N	N	H	N	T	T	H	N	T	T	N	H	T	N	N	N	N	T	N
B05	AX-147223969	AX-147223969_A05		26.301				N	T	T	N	N	N	N	N	N	T	N	N	T	T	T	T	T	T	N	N	T	N	N	N	-	N	N	T	T	N	N	N	T	N	N	T	N	N	N	N	T	N
B05	AX-147223970	AX-147223970_B05		27.017				N	T	T	N	N	N	N	N	N	T	N	N	T	T	T	T	T	T	N	N	T	N	N	N	N	-	N	T	T	N	N	N	T	N	N	T	N	N	N	N	T	N
B05	AX-147223971	AX-147223971_B05		28.583				N	T	T	N	N	H	N	N	N	T	N	N	T	T	T	T	T	T	N	N	T	N	N	N	N	-	N	T	T	-	N	N	T	N	N	T	N	N	N	N	T	N
B06_1	AX-147225103	AX-147225103_A06		0	Arahy.16	1128718		T	N	N	T	H	N	N	N	T	-	N	N	T	N	T	T	N	T	N	N	N	N	N	T	T	N	N	N	T	N	N	T	T	N	N	N	T	T	N	N	N	T
B06_1	AX-147251587	AX-147251587_B06		0.34				T	N	N	T	N	N	N	N	T	N	N	N	T	N	T	T	N	T	N	N	N	N	N	T	T	N	N	N	T	N	N	T	T	N	N	N	T	T	N	N	N	T
B06_1	AX-147225061	AX-147225061_B06		9.27	Arahy.16	1740372		N	T	N	N	T	N	N	N	N	N	N	T	T	N	T	T	N	T	N	T	N	N	N	T	T	N	N	N	T	N	N	T	T	T	T	N	T	T	N	T	H	T
B06_1	AX-147225018	AX-147225018_B06		15.683	Arahy.16	2024573		N	T	N	N	T	N	N	N	N	T	N	T	N	N	T	T	T	T	N	T	N	N	N	T	T	N	N	N	T	N	N	T	T	T	T	N	N	T	N	T	T	T
B06_1	AX-147251694	AX-147251694_B06		20.993	Arahy.16	2324901		N	T	N	N	T	N	N	N	N	N	N	T	T	N	T	H	T	T	N	T	N	N	N	T	T	N	N	N	T	N	N	T	T	T	T	N	N	H	N	T	H	T
B06_1	AX-147251710	AX-147251710_B06		22.179	Arahy.16	2475692		N	T	N	N	T	N	N	N	N	N	N	T	T	N	T	H	T	T	N	T	N	N	N	N	T	N	N	N	T	N	N	T	T	T	N	N	N	H	N	T	H	T
B06_1	AX-147224978	AX-147224978_B06		22.511	Arahy.16	2475580		N	T	N	N	T	N	N	N	N	N	N	T	T	N	T	H	T	T	N	T	N	N	N	N	T	N	N	N	T	N	N	T	T	T	N	N	N	H	N	T	H	T
B06_1	AX-147251757	AX-147251757_B06		23.178	Arahy.16	6356497		N	T	N	N	T	N	N	N	N	N	N	T	T	N	T	H	T	T	N	T	N	N	N	N	T	N	N	N	T	N	N	T	T	T	N	N	N	N	N	T	N	T
B06_1	AX-147251762	AX-147251762_B06		23.517	Arahy.16	6452811		N	T	N	N	T	N	N	N	N	N	N	T	T	N	T	H	T	T	N	T	N	N	N	N	T	N	N	N	T	N	N	T	T	T	N	N	N	N	N	T	N	T
B06_1	AX-147251776	AX-147251776_B06		31.69	Arahy.16	6592937		N	T	N	N	T	N	N	N	N	N	N	T	N	N	T	N	T	T	N	T	N	N	N	N	T	N	N	N	T	N	N	T	T	T	N	H	N	N	N	T	N	T
B06_1	AX-147251814	AX-147251814_B06		40.568	Arahy.16	7172927		N	T	N	N	T	N	N	N	N	N	N	T	N	N	T	N	T	T	N	T	N	N	T	N	T	N	N	N	T	N	T	T	T	T	N	T	N	N	N	T	N	T
B06_1	AX-147251799	AX-147251799_B06		51.065	Arahy.16	7032417		H	T	N	N	T	N	N	N	N	-	N	T	T	N	T	H	T	T	N	T	N	N	T	N	T	N	N	N	T	N	H	T	T	T	N	T	N	N	N	T	N	T
B06_1	AX-147251798	AX-147251798_B06		52.625	Arahy.16	7009183		N	T	N	N	T	N	N	N	N	N	N	T	T	N	T	T	T	T	N	T	N	N	T	N	T	N	N	N	T	N	N	T	T	T	N	T	N	N	N	T	N	T
B06_1	AX-147251809	AX-147251809_B06		56.242	Arahy.16	7147520		N	T	N	N	T	N	N	N	N	N	N	T	T	N	T	H	T	T	N	T	N	N	T	N	T	N	N	N	T	N	T	T	T	T	N	T	N	N	N	T	N	T
B06_1	GM2444	GM2444_a06-b06	EZ756603	71.111	Arahy.16	14368138		N	T	N	N	T	N	N	N	N	T	T	T	T	N	T	H	T	T	N	N	N	N	T	N	N	H	T	N	N	T	T	T	T	T	N	T	N	-	T	-	N	N
B06_1	AX-147252043	AX-147252043_B06		74.416	Arahy.16	11356902		N	T	N	N	T	N	N	N	N	T	T	T	T	N	T	T	T	T	N	N	N	N	T	N	N	N	T	N	T	T	T	T	T	T	N	T	N	N	N	T	N	N
B06_1	AX-147224703	AX-147224703_B06		79.089	Arahy.16	11294335		N	T	N	N	T	N	N	N	N	T	T	T	N	N	T	T	T	T	N	N	N	N	T	N	N	N	T	N	T	T	T	T	T	T	N	T	N	N	N	T	N	N
B06_1	AX-147224555	AX-147224555_A06		81.923	Arahy.16	14189072		N	T	N	N	T	N	N	N	N	T	T	T	T	N	T	N	T	T	N	N	N	N	T	N	N	N	T	N	T	T	T	T	T	T	N	T	N	N	N	T	N	N
B06_1	AX-147224554	AX-147224554_B06		83.286	Arahy.16	11989533		N	T	N	N	N	N	N	N	-	T	T	T	T	N	T	N	T	T	N	N	N	N	T	N	N	N	T	N	T	T	T	T	T	N	-	T	N	N	N	T	N	N
B06_1	AX-147224563	AX-147224563_B06		85.435	Arahy.16	12005839		N	T	N	N	T	N	N	N	N	T	T	T	T	N	T	H	T	T	N	N	N	N	T	N	N	N	T	N	N	T	H	T	T	T	N	T	N	N	N	T	N	N
B06_1	AX-147252322	AX-147252322_B06		88.997	Arahy.16	18368165		N	T	N	N	T	N	N	N	N	T	T	T	T	N	T	-	T	T	N	N	N	N	T	N	N	N	T	N	N	T	T	T	T	T	N	T	N	N	T	T	N	N
B06_1	AX-147252309	AX-147252309_B06		89.512	Arahy.16	18036718		N	T	N	N	T	N	N	N	N	H	T	T	T	N	T	T	T	T	N	N	N	N	T	N	N	N	T	N	N	T	T	T	T	T	N	T	N	N	T	T	N	N
B06_1	AX-147211599	AX-147211599_B06		90.44	Arahy.16	20175112		N	N	N	N	T	N	N	N	N	T	T	T	T	N	T	T	T	T	N	N	N	N	T	N	N	N	T	N	N	T	T	T	T	T	N	T	N	N	T	T	N	N
B06_1	AX-147252426	AX-147252426_B06		91.071	Arahy.16	21094029		N	N	N	N	T	N	N	N	N	-	T	T	T	N	T	T	T	T	N	N	N	N	T	N	N	N	T	N	-	T	T	T	T	T	N	T	N	N	T	T	N	N
B06_1	AX-147252379	AX-147252379_B06		94.194	Arahy.16	19626916		N	N	N	N	T	N	-	N	N	T	T	T	T	N	T	T	T	T	N	T	N	N	T	N	N	N	T	N	T	T	T	T	T	T	N	T	N	N	-	T	N	N
B06_1	AX-147252443	AX-147252443_B06		98.18	Arahy.16	21479995		N	N	N	N	T	N	N	N	N	-	T	T	T	N	T	T	T	T	N	N	N	N	T	N	N	N	T	N	N	T	T	T	T	T	N	T	N	N	-	T	N	N
B06_1	AX-147252623	AX-147252623_B06		100.467	Arahy.16	28981794		N	N	N	N	T	N	N	N	N	T	T	T	T	N	T	T	T	T	N	N	N	N	T	T	N	T	T	N	N	T	T	T	T	T	N	T	N	N	T	T	N	N
B06_1	AX-147252675	AX-147252675_B06		101.832	Arahy.16	31861612		N	N	N	N	T	N	N	N	N	T	T	T	T	N	N	T	T	T	N	N	N	N	T	T	N	T	T	N	N	T	T	T	T	T	N	T	N	N	T	T	N	N
B06_1	AX-147252714	AX-147252714_B06		103.297	Arahy.16	34889730		N	N	N	N	T	N	N	N	N	T	T	T	T	N	N	T	N	T	N	N	N	N	T	-	N	T	T	N	N	T	T	T	T	T	N	T	N	N	T	T	N	N
B06_1	AX-147252705	AX-147252705_B06		104.143	Arahy.16	34436052		N	N	N	N	T	N	N	N	N	N	T	T	T	N	N	T	N	T	N	N	N	N	T	T	N	T	T	N	N	T	T	T	T	T	N	T	N	-	T	T	N	N
B06_1	AX-147252775	AX-147252775_B06		105.685	Arahy.16	39422275		N	N	N	N	T	N	N	N	N	T	T	T	T	N	N	T	N	T	N	N	N	N	T	-	N	T	T	N	N	T	T	T	T	T	N	T	N	N	T	T	N	N
B06_1	AX-147252910	AX-147252910_B06		108.037	Arahy.16	93174313		N	N	N	N	T	N	N	N	N	T	T	T	T	N	N	T	N	T	N	N	N	N	T	T	N	T	T	N	N	T	T	T	T	T	N	T	N	N	-	T	N	N
B06_1	AX-147252877	AX-147252877_B06		109.81	Arahy.16	67424243
B06_1	AX-147218021	AX-147218021_B06		110.386	Arahy.16	96069621		N	N	N	N	T	N	N	N	N	T	T	T	T	N	N	T	N	T	N	N	N	N	T	T	N	T	T	N	N	T	T	T	T	T	N	T	N	N	T	T	N	N
B06_1	AX-147252936	AX-147252936_B06		111.148	Arahy.16	96046634		N	N	N	N	N	N	N	N	N	T	T	T	T	N	N	T	N	T	N	N	N	N	T	-	N	T	T	N	N	T	T	T	T	T	N	T	N	N	T	T	N	N
B06_1	AX-147225842	AX-147225842_B06		111.865	Arahy.16	46570596		N	N	N	N	T	N	N	N	N	T	-	T	T	N	N	T	N	T	N	N	N	N	T	T	N	T	T	N	N	T	T	T	T	T	N	T	N	N	T	T	N	N
B06_1	AX-147225843	AX-147225843_B06		112.259	Arahy.16	46570400		N	N	N	N	T	N	N	N	N	T	-	T	T	H	N	T	N	T	N	-	N	N	T	T	N	T	T	N	N	T	T	T	T	T	N	T	N	N	T	T	N	N
B06_1	AX-147252853	AX-147252853_B06		113.692	Arahy.16	56820709		N	N	N	N	T	N	N	N	N	T	H	T	T	N	N	T	N	T	N	N	N	N	T	H	N	T	T	N	N	T	T	T	T	T	N	T	N	N	T	T	N	N
B06_1	AX-147253048	AX-147253048_B06		114.533	Arahy.16	113372187		N	N	N	N	T	N	N	N	N	T	H	T	T	N	N	T	N	T	N	N	N	N	T	H	N	T	T	N	N	T	T	T	T	T	N	T	N	N	T	T	N	N
B06_1	AX-147253131	AX-147253131_B06		118.366	Arahy.16	120319147		N	N	N	T	T	N	N	N	N	T	N	T	N	N	N	T	N	T	N	N	N	N	T	T	N	T	T	N	N	T	T	T	T	T	N	T	N	N	T	T	N	N
B06_1	AX-147225745	AX-147225745_A06		121.63	Arahy.16	121665033		-	N	-	T	T	N	H	N	N	T	H	T	H	N	H	T	N	T	N	H	N	N	T	T	N	T	T	N	H	T	T	T	T	T	H	T	N	N	T	T	N	N
B06_1	GM408	PM210		125.058	Arahy.16	124958321		N	N	N	T	T	N	N	N	N	-	H	T	N	N	N	T	N	T	N	N	N	N	T	H	N	T	T	N	N	T	T	T	T	T	H	T	N	-	T	-	-	N
B06_1	AX-147225757	AX-147225757_B06		126.291	Arahy.16	122035844		N	N	N	T	T	N	N	N	N	T	H	T	N	N	N	T	N	T	N	N	N	N	T	H	N	T	T	N	N	T	T	T	T	T	N	T	N	N	T	T	N	N
B06_1	AX-147253166	AX-147253166_B06		126.291	Arahy.16	123418105		N	N	N	T	T	N	N	N	N	T	H	T	N	N	N	T	N	T	N	N	N	N	T	H	N	T	T	N	N	T	-	T	T	T	N	T	N	N	T	T	N	N
B06_1	AX-147253371	AX-147253371_B06		130.126	Arahy.16	132606011		N	N	N	T	T	N	N	N	N	T	H	T	T	N	T	T	N	T	N	N	N	N	T	H	N	T	N	N	N	T	T	T	T	T	N	T	N	T	T	T	N	N
B06_1	AX-147253324	AX-147253324_B06		131.809	Arahy.16	130499175		N	N	N	T	-	N	N	N	N	H	T	T	T	N	T	T	N	T	N	N	N	N	T	T	N	T	N	N	N	T	T	T	T	T	N	T	N	T	T	T	N	N
B06_1	AX-147253410	AX-147253410_B06		134.324	Arahy.16	134242039		N	N	N	T	T	N	N	N	N	T	T	T	T	N	T	T	N	T	N	N	N	N	T	T	N	T	N	N	N	T	N	T	T	T	N	T	N	T	T	T	N	N
B06_1	AX-147253437	AX-147253437_B06		135.864	Arahy.16	135069169		N	N	N	T	T	N	N	N	N	T	H	T	T	N	T	T	T	T	N	N	N	N	T	H	N	T	N	N	N	T	N	T	T	T	N	T	N	T	T	T	N	N
B06_1	AX-147253476	AX-147253476_B06		137.583	Arahy.16	136072269		N	N	N	T	T	N	N	N	N	T	T	T	T	N	T	T	T	T	N	N	N	N	T	T	N	T	N	N	N	T	N	T	T	T	N	T	N	T	T	T	N	N
B06_1	AX-147253495	AX-147253495_B06		139.673	Arahy.16	136397773		N	N	N	T	T	N	T	T	N	T	H	T	T	N	T	H	T	T	N	N	N	N	T	H	N	T	N	N	N	T	H	T	T	T	N	T	N	N	T	T	N	N
B06_1	AX-147226048	AX-147226048_B06		141.213	Arahy.16	138285722		N	N	N	T	T	N	T	T	N	T	H	T	T	N	T	T	T	T	N	N	N	N	T	T	N	T	N	N	N	T	N	T	T	T	N	T	N	N	T	T	N	N
B06_1	AX-147253608	AX-147253608_B06		143.69	Arahy.16	139287970
B06_1	AX-147253650	AX-147253650_B06		147.245	Arahy.16	140362354		N	N	N	T	T	N	T	T	N	N	N	T	T	N	T	N	T	T	N	N	N	N	T	T	N	T	N	N	N	T	N	T	T	T	N	T	N	N	T	T	N	N
B06_1	AX-147253835	AX-147253835_B06		159.887	Arahy.16	146399460		N	T	N	T	T	N	T	T	N	N	N	N	T	N	T	N	T	N	N	N	N	T	N	N	N	T	N	T	N	T	N	N	T	T	N	T	N	N	T	T	N	N
B06_1	AX-147253887	AX-147253887_A06		163.433				N	N	N	T	-	N	T	T	N	T	N	N	T	N	T	N	T	N	N	N	N	T	N	N	-	T	N	T	N	T	-	N	T	T	T	T	N	N	T	N	N	T
B06_1	AX-147253876	AX-147253876_A06		166.066				N	T	N	T	T	N	T	T	N	N	N	N	T	N	T	N	T	N	N	N	N	T	N	N	N	T	N	T	N	T	N	N	T	T	N	T	N	N	T	N	N	N
B06_1	AX-147226358	AX-147226358_A06		172.716				N	T	N	T	T	N	T	T	N	N	N	N	T	N	T	T	T	N	N	N	N	T	N	N	N	T	N	T	N	T	N	T	T	T	N	T	N	N	T	N	N	N
B06_1	AX-147253833	AX-147253833_B06		173.704	Arahy.16	146387793		N	T	N	T	T	N	T	T	N	-	N	N	T	N	T	T	T	N	N	N	N	T	N	N	N	T	N	T	N	T	N	T	T	T	N	T	N	N	T	T	N	N
B06_1	AX-147226316	AX-147226316_A06		174.398				N	T	N	T	T	N	T	T	N	T	N	N	T	N	T	T	T	N	N	N	N	T	N	N	-	T	N	T	N	T	N	-	T	T	N	T	N	N	T	T	N	N
B06_1	AX-147226318	AX-147226318_A06		174.896	Arahy.16	146397577		N	T	N	T	T	N	T	T	-	N	N	N	T	N	T	T	T	N	N	N	N	T	N	N	N	T	N	T	N	T	-	T	T	T	-	T	N	N	T	T	N	N
B06_1	AX-147226320	AX-147226320_A06		175.121	Arahy.16	146400711		N	T	N	T	T	N	T	T	N	N	N	N	T	N	T	T	T	N	N	N	N	T	N	N	N	T	N	T	N	T	N	T	T	T	N	T	N	N	T	T	N	N
B06_1	AX-147226313	AX-147226313_A06		176.068				N	T	N	T	T	N	T	T	N	N	N	N	T	N	T	T	T	N	N	N	N	T	N	N	N	T	N	T	N	T	N	T	T	T	N	T	N	N	T	T	N	N
B06_1	AX-147226319	AX-147226319_A06		179.389	Arahy.16	146399551		N	T	N	T	T	N	T	T	N	-	N	N	T	N	T	T	T	N	N	N	N	T	-	N	N	T	N	T	N	T	N	T	T	T	H	T	N	N	T	T	N	N
B06_1	AX-147236104	AX-147236104_A10		194.589	Arahy.16	150869462		N	N	N	T	T	N	T	T	N	N	N	N	T	N	T	T	N	N	N	T	N	T	N	T	N	T	T	N	N	T	N	T	T	T	T	N	N	N	T	N	N	T
B06_1	AX-147254159	AX-147254159_B06		196.673	Arahy.16	151251391		N	N	N	T	T	N	T	T	N	-	N	N	T	N	T	T	N	N	N	T	N	T	N	T	-	T	T	N	N	T	N	T	T	T	T	N	N	N	T	N	N	T
B06_1	AX-147254170	AX-147254170_B06		198.036	Arahy.16	151389220		N	N	N	T	T	N	T	T	N	N	N	N	T	N	N	T	N	N	N	T	N	T	N	T	N	T	T	N	N	T	N	T	T	T	T	N	N	N	T	N	N	T
B06_1	AX-147226614	AX-147226614_B06		198.593				N	N	N	T	T	N	T	T	N	-	N	N	T	-	N	T	N	N	N	T	N	T	N	T	N	T	T	N	N	T	N	T	T	T	T	N	N	N	T	N	N	T
B06_1	AX-147226669	AX-147226669_A06		200.77				N	N	N	T	T	N	T	T	N	N	T	N	T	N	N	T	N	N	N	T	N	T	N	T	N	T	T	N	T	T	N	T	T	T	T	N	N	N	T	N	N	T
B06_1	AX-147254200	AX-147254200_A06		201.302	Arahy.16	152158934		N	N	N	T	T	N	T	T	N	N	T	N	T	N	N	T	N	N	N	T	N	T	N	T	N	T	T	N	T	T	N	T	T	T	T	N	N	N	T	N	N	T
B06_1	AX-147254201	AX-147254201_B06		201.633	Arahy.16	152160768		N	N	N	T	T	N	T	T	N	N	T	N	T	N	N	T	N	N	N	T	N	T	N	T	N	T	T	N	T	T	N	T	T	T	T	N	N	N	T	N	N	T
B06_1	AX-147254237	AX-147254237_B06		203.003	Arahy.16	152759271		N	N	N	T	T	N	T	T	N	N	T	N	T	N	N	N	N	N	N	T	N	T	N	T	N	T	T	N	T	T	N	-	T	T	T	N	N	N	T	N	N	T
B06_2	AX-147253963	AX-147253963_B06		0	Arahy.16	148874868		N	N	T	N	N	T	N	N	N	T	N	N	N	N	T	T	T	T	N	T	T	N	T	N	T	N	N	N	N	N	T	T	T	T	N	N	T	N	N	N	T	N
B06_2	AX-147226664	AX-147226664_B06		6.725	Arahy.16	152029807		N	N	T	N	-	T	N	N	N	T	N	N	T	N	T	T	T	T	N	T	T	N	T	N	H	H	N	T	N	N	T	T	T	T	N	T	T	T	N	N	T	N
B06_2	AX-147226654	AX-147226654_A06		6.904	Arahy.16	151867267		N	N	T	N	H	T	N	N	N	T	N	N	T	N	T	T	T	T	N	T	T	N	T	N	H	H	N	T	N	N	T	T	T	T	N	T	T	T	N	N	T	N
B06_2	AX-147226662	AX-147226662_B06		6.938	Arahy.16	152028482		N	N	T	N	H	T	N	N	N	T	N	N	T	N	T	T	T	T	N	T	T	N	T	N	H	H	N	T	N	N	T	T	T	T	-	T	T	T	N	N	T	N
B06_2	AX-147254195	AX-147254195_B06		7.118	Arahy.16	152049018		N	N	T	N	H	T	N	N	N	T	N	N	T	N	T	T	T	T	N	T	T	N	T	N	H	H	N	T	N	N	T	T	T	T	N	T	T	T	N	N	T	N
B06_2	AX-147226642	AX-147226642_B06		7.461	Arahy.16	151773245		N	N	T	N	H	T	N	N	N	T	N	N	T	N	T	T	T	T	N	T	T	N	T	N	H	H	N	T	N	N	T	T	T	T	N	T	T	T	N	N	T	N
B06_2	AX-147226666	AX-147226666_B06		8.047	Arahy.16	152031710		N	N	T	N	H	T	N	N	N	T	N	N	-	-	T	T	T	T	N	T	T	N	T	N	H	H	N	T	N	N	T	T	T	T	N	T	T	T	N	N	T	N
B06_2	AX-147254179	AX-147254179_B06		9.708				N	N	T	N	-	T	N	N	N	T	N	N	N	N	T	T	T	T	N	T	T	N	T	N	H	N	N	T	N	N	T	T	T	T	N	T	T	T	N	N	T	N
B06_2	AX-147226635	AX-147226635_A06		11.099	Arahy.16	151771014		N	N	T	N	-	T	N	N	N	T	N	N	-	N	T	T	T	T	N	T	T	N	T	N	-	N	N	T	N	N	T	T	T	T	N	T	T	T	N	N	T	N
B06_2	AX-147226665	AX-147226665_B06		12.038	Arahy.16	152030508		N	N	T	N	-	T	N	N	N	T	N	N	N	N	T	T	T	T	N	T	T	N	T	N	-	T	N	T	N	N	T	T	T	T	N	T	T	T	N	N	T	N
B06_2	AX-147226650	AX-147226650_B06		12.52	Arahy.16	151787136		N	N	T	N	T	T	N	N	N	T	N	N	T	N	T	T	T	T	N	T	T	N	T	N	H	T	N	T	N	N	T	-	T	T	N	T	T	T	N	N	T	N
B06_2	AX-147254196	AX-147254196_B06		13.018	Arahy.16	152091598		N	N	T	N	H	T	N	N	N	T	N	N	T	N	T	T	T	T	N	T	T	N	T	N	H	T	N	T	N	N	T	T	T	T	N	T	T	T	N	N	T	N
B06_2	AX-147226672	AX-147226672_A06		13.845	Arahy.16	152171521		N	N	T	N	H	T	N	N	N	T	N	N	H	N	T	T	H	T	N	T	T	N	T	N	H	-	N	T	N	N	-	T	T	T	N	T	T	T	N	N	T	N
B06_2	AX-147230687	AX-147230687_B04		14.665	Arahy.16	152021159		N	N	T	N	H	T	N	N	N	T	N	N	-	N	T	T	T	T	N	T	T	N	-	N	H	-	N	T	N	N	H	T	T	T	N	T	T	T	N	N	T	N
B06_2	AX-147264279	AX-147264279_B06		14.879	Arahy.16	151781802		N	N	T	N	H	T	N	N	N	T	N	N	T	N	T	T	T	T	N	T	T	N	T	N	H	H	N	T	N	N	T	T	T	T	N	T	T	T	N	N	T	N
B06_2	AX-147226673	AX-147226673_B06		14.879	Arahy.16	152171573		N	N	T	N	H	T	N	N	N	T	N	N	T	N	T	T	T	T	N	T	T	N	T	N	H	H	N	T	N	N	T	T	T	T	N	T	T	T	N	N	T	N
B06_2	AX-147226659	AX-147226659_A06		14.896	Arahy.16	151946679		N	N	T	N	H	T	N	N	N	T	N	N	T	N	T	T	T	T	N	T	T	N	T	N	H	H	N	T	N	N	T	T	T	T	N	T	T	T	N	N	T	N
B06_2	AX-147226646	AX-147226646_B06		15.188	Arahy.16	151784685		N	N	T	N	H	T	N	N	N	T	N	N	-	N	T	T	T	T	N	T	T	N	T	N	H	H	N	T	N	N	T	T	T	T	N	T	T	T	N	N	T	N
B06_2	AX-147226655	AX-147226655_B06		15.208	Arahy.16	151895716		N	N	T	N	H	T	N	N	N	T	N	N	H	N	T	T	T	T	N	T	T	N	T	N	H	H	N	T	N	N	T	T	T	T	N	T	T	T	N	N	T	N
B06_2	AX-147254175	AX-147254175_B06		15.373				N	N	T	N	H	T	N	N	N	T	N	N	H	N	T	T	T	T	N	T	T	N	T	N	H	H	N	T	N	N	T	T	T	T	N	T	T	T	N	N	T	N
B06_2	AX-147226676	AX-147226676_B06		15.537	Arahy.16	152172305		N	N	T	N	H	T	N	N	N	T	N	N	H	N	T	T	T	T	N	T	T	N	T	N	H	H	N	T	N	N	T	T	T	T	N	T	T	T	N	N	T	N
B06_2	AX-147254180	AX-147254180_B06		15.926	Arahy.16	151744551		N	N	T	N	H	T	N	N	-	T	N	N	H	-	T	T	T	T	N	T	T	N	T	N	-	H	N	T	N	N	T	T	T	T	N	T	T	T	N	N	T	N
B06_2	AX-147254174	AX-147254174_A06		16.636	Arahy.16	151660979		N	N	T	N	H	T	N	N	H	T	N	N	T	N	T	T	T	T	N	T	T	N	T	N	H	T	N	T	N	N	T	T	T	T	-	T	T	T	N	N	T	N
B06_2	AX-147254193	AX-147254193_A06		17.081				N	N	T	N	H	T	N	N	H	T	N	N	T	N	T	T	T	T	H	T	T	N	T	N	H	T	N	T	N	N	T	T	T	T	N	T	T	T	N	N	T	N
B06_2	AX-147226640	AX-147226640_B06		18.394	Arahy.16	151772055		N	N	T	N	T	T	N	N	N	T	N	N	T	N	T	T	T	T	N	T	T	N	T	N	T	H	N	T	N	N	T	T	T	T	H	T	T	T	N	N	T	N
B06_2	AX-147261272	AX-147261272_B09		19.344	Arahy.16	151938436		N	N	T	N	-	T	N	N	N	T	N	N	T	N	T	T	T	T	N	T	T	N	T	N	H	T	N	T	N	N	T	T	T	T	-	T	T	T	N	N	T	N
B06_2	AX-147226649	AX-147226649_B10		20.349				N	N	T	N	-	T	N	N	N	T	N	-	T	N	T	T	T	T	N	T	T	N	T	N	N	T	N	T	N	N	T	T	T	T	T	T	T	T	N	N	T	N
B06_2	AX-147226647	AX-147226647_A06		21.411	Arahy.16	151785573		N	N	T	N	N	T	N	N	N	T	N	N	T	N	T	T	T	T	N	T	T	N	T	N	N	T	N	T	N	N	T	T	T	T	N	T	T	T	N	N	T	N
B06_2	AX-147226643	AX-147226643_A06		22.218				N	N	T	N	N	T	N	N	N	T	N	N	T	N	T	T	T	T	N	T	T	N	T	N	N	-	N	T	N	N	T	T	T	T	N	T	T	T	N	N	T	N
B06_2	AX-147226657	AX-147226657_A06		24.044	Arahy.16	151901539		N	N	T	N	-	T	N	N	N	T	N	N	T	N	T	T	T	T	N	T	T	N	T	N	-	N	N	T	N	N	T	T	T	T	N	T	T	T	N	N	T	N
B06_2	AX-147254190	AX-147254190_A06		25.553				N	N	T	N	N	T	N	N	N	T	N	N	-	N	T	T	T	T	N	T	T	N	T	N	N	N	N	T	N	N	T	T	T	T	N	T	T	T	N	N	T	N
B06_2	AX-147254192	AX-147254192_A06		25.56				N	N	T	N	N	T	N	N	N	T	N	N	T	N	T	T	T	T	N	T	T	N	T	N	N	-	N	T	N	N	T	T	T	T	N	T	T	T	N	N	T	N
B06_2	AX-147264278	AX-147264278_B10		26.563				N	N	T	N	N	T	N	N	N	T	N	N	T	N	T	T	T	T	N	T	T	N	T	N	T	T	N	T	N	N	T	T	T	T	N	T	T	T	N	N	T	N
B06_2	AX-147226648	AX-147226648_B10		27.416				N	N	T	N	N	T	N	N	N	-	N	-	T	N	T	T	T	T	N	T	T	N	T	N	-	-	N	T	N	-	T	T	T	T	N	T	T	T	N	-	T	N
B06_2	AX-147254198	AX-147254198_A06		28.243				N	N	T	T	N	T	N	N	N	T	N	N	T	N	T	T	T	T	N	T	T	-	T	-	T	N	N	T	N	N	T	T	T	T	N	T	T	T	N	N	T	N
B06_2	AX-147226630	AX-147226630_A06		30.468	Arahy.16	151688515		N	N	T	N	-	T	N	N	-	T	N	N	T	N	T	T	T	T	N	T	T	N	T	N	-	T	N	T	H	N	T	T	T	T	H	T	T	T	N	N	T	N
B06_2	AX-147261271	AX-147261271_B09		32.152	Arahy.16	151938563		N	N	T	N	-	T	N	N	N	T	N	N	T	N	T	T	T	T	N	T	T	N	T	N	T	T	N	T	N	N	T	T	T	T	N	T	T	T	-	-	T	N
B06_2	AX-147254188	AX-147254188_B06		34.61	Arahy.16	151975856		N	N	T	N	T	T	N	N	N	T	N	N	T	N	T	T	T	T	T	T	T	N	T	N	T	T	N	T	N	N	T	T	T	T	-	T	T	T	-	-	T	N
B06_2	AX-147226656	AX-147226656_B06		37.354	Arahy.16	151900796		N	N	T	N	T	T	N	N	N	T	N	N	T	N	T	T	T	T	N	T	T	N	T	N	T	T	N	T	N	N	T	T	T	T	N	T	T	T	N	N	T	N
B06_2	AX-147254173	AX-147254173_B06		38.091	Arahy.16	151646130		N	N	T	N	T	T	N	N	N	T	N	N	T	N	T	T	T	T	N	T	T	N	T	N	T	T	N	T	N	N	T	T	T	T	N	T	T	T	N	N	T	N
B06_2	AX-147226634	AX-147226634_B06		38.421	Arahy.16	151770940		N	N	T	N	T	T	N	N	N	T	-	N	T	N	T	T	T	T	N	T	T	N	T	N	T	T	N	T	N	N	T	T	T	T	N	T	T	T	N	N	T	N
B06_2	AX-147254194	AX-147254194_B06		38.752	Arahy.16	152048256		N	N	T	N	-	T	N	N	N	T	N	N	T	N	T	T	T	T	N	T	T	N	T	N	T	T	N	T	N	N	T	T	T	T	N	T	T	T	N	N	T	N
B06_2	AX-147254207	AX-147254207_B06		38.752	Arahy.16	152283876		N	N	T	N	T	T	-	N	N	T	N	N	T	N	T	-	T	T	N	T	T	N	T	N	T	T	N	T	N	-	T	-	T	T	N	T	T	T	N	N	T	N
B06_2	AX-147226638	AX-147226638_B06		38.92	Arahy.16	151771314		N	N	T	N	T	T	N	N	N	T	N	N	T	N	T	T	T	T	N	T	T	N	-	N	T	T	N	T	N	N	T	T	T	T	N	T	T	T	N	N	-	N
B06_2	AX-147226629	AX-147226629_A06		39.081	Arahy.16	151688509		N	N	T	N	T	T	N	N	N	T	N	N	T	N	T	T	T	T	N	T	T	N	T	N	T	T	N	T	N	N	T	T	T	T	-	T	T	T	N	N	T	N
B06_2	AX-147254181	AX-147254181_B06		39.548	Arahy.16	151776543		N	N	T	N	T	T	N	N	N	T	N	N	T	N	T	T	T	T	N	T	T	N	T	N	T	T	N	T	N	N	T	T	T	T	N	T	T	T	N	N	T	N
B06_2	AX-147254197	AX-147254197_A06		40.976	Arahy.16	152091800		N	N	T	N	H	T	N	N	N	T	N	N	T	N	T	T	T	T	N	T	T	N	T	N	-	-	N	T	N	N	T	T	T	T	N	T	T	T	N	N	T	N
B06_2	AX-147226658	AX-147226658_B06		41.742	Arahy.16	151946117		N	N	T	N	H	T	N	N	N	T	N	N	T	N	T	T	T	T	N	T	T	N	T	N	H	N	N	T	N	N	T	T	T	T	N	T	T	T	N	N	T	N
B06_2	AX-147226636	AX-147226636_A06		42.151	Arahy.16	151771147		N	N	T	N	H	T	N	N	N	-	N	N	T	N	T	T	T	T	N	T	T	N	T	N	H	-	N	T	N	N	T	T	T	T	N	T	T	T	N	N	T	N
B06_2	AX-147226670	AX-147226670_A06		42.428	Arahy.16	152157003		N	N	T	N	H	T	N	N	N	T	N	N	T	N	T	T	T	T	N	T	T	N	T	N	-	T	N	T	N	N	T	T	T	T	N	T	T	T	N	N	T	N
B06_2	AX-147253008	AX-147253008_A06		43.363				N	N	T	-	-	T	N	N	N	T	N	N	-	N	T	T	T	T	N	T	T	N	T	N	N	T	N	T	N	N	T	T	T	T	N	T	T	T	N	N	T	-
B06_2	AX-147254259	AX-147254259_A06		51.77	Arahy.16	153309630		N	N	T	N	T	T	N	N	N	T	N	N	T	T	T	-	T	T	N	T	N	N	T	N	N	N	N	T	N	N	T	N	T	T	N	T	T	T	N	N	T	N
B06_2	AX-147226775	AX-147226775_A06		52.886	Arahy.16	153402148		N	N	T	N	T	T	N	N	N	T	N	N	T	T	T	-	T	T	N	T	N	N	T	N	T	N	N	T	N	N	T	N	T	T	N	T	T	T	N	N	T	N
B06_2	AX-147226776	AX-147226776_A06		52.901	Arahy.16	153431903		N	N	T	N	T	T	N	N	N	T	N	N	T	T	T	T	T	T	N	T	N	N	T	N	T	N	N	-	N	N	T	N	T	T	N	T	T	T	N	N	T	N
B07_1	AX-147254458	AX-147254458_B07		0	Arahy.17	2874098		T	T	N	T	N	N	N	N	T	T	N	H	T	T	N	N	T	T	T	N	N	T	T	T	T	T	H	T	N	N	T	N	T	T	N	N	T	T	T	T	T	T
B07_1	AX-147254447	AX-147254447_B07		3.924	Arahy.17	2918376		T	T	N	T	N	N	T	T	T	T	N	N	T	T	N	N	T	T	T	N	N	T	T	T	T	T	N	T	N	N	T	T	T	T	N	N	T	T	T	T	T	T
B07_1	AX-147227101	AX-147227101_A07		8.499	Arahy.17	3217235		T	T	T	T	N	N	T	N	T	T	N	N	T	T	N	-	T	T	T	N	N	T	N	T	T	N	N	T	T	N	T	T	T	T	T	N	T	T	T	T	T	T
B07_1	AX-147227112	AX-147227112_B07		9.596	Arahy.17	3288659		T	T	T	T	N	N	N	N	T	T	N	N	T	T	N	N	T	T	T	N	N	T	N	T	T	N	N	T	T	N	T	T	T	T	N	N	T	T	T	T	T	T
B07_1	AX-147227117	AX-147227117_B07		9.596	Arahy.17	3311557		T	T	T	T	N	N	N	N	T	T	N	-	T	T	N	N	T	T	T	N	N	T	N	T	T	N	N	T	T	N	T	T	T	T	N	N	T	T	T	T	T	T
B07_1	AX-147227214	AX-147227214_B07		9.927	Arahy.17	3405703		T	T	T	T	N	N	N	N	T	T	N	N	T	T	N	T	T	T	T	N	N	T	N	T	T	N	N	T	T	N	T	T	T	T	N	N	T	T	T	T	T	T
B07_1	AX-147227098	AX-147227098_B07		9.936	Arahy.17	3338019		T	T	T	T	N	N	N	N	T	T	N	-	T	T	N	T	T	T	T	N	N	T	N	T	T	N	N	T	T	N	T	T	T	T	N	N	T	T	T	T	T	T
B07_1	AX-147227212	AX-147227212_A07		10.257	Arahy.17	3406246		T	T	T	T	N	N	N	N	T	T	N	H	T	T	N	T	T	T	T	N	N	T	N	T	T	N	N	T	T	N	T	T	T	T	N	N	T	T	T	T	T	T
B07_1	AX-147227199	AX-147227199_B06		10.581	Arahy.17	3408978		T	T	T	T	N	N	N	N	T	T	N	-	T	T	N	T	T	T	T	N	N	T	N	T	T	N	N	T	T	N	T	T	T	T	N	N	T	T	T	T	T	T
B07_1	AX-147227217	AX-147227217_B07		10.587	Arahy.17	3403139		T	T	T	T	N	N	N	N	T	-	N	T	T	T	N	T	T	T	T	N	N	T	N	T	T	N	N	T	T	N	T	T	T	T	N	N	T	T	T	T	T	T
B07_1	AX-147227097	AX-147227097_B07		10.587	Arahy.17	3337740		T	T	T	T	N	N	N	N	T	T	N	T	T	T	N	T	T	T	T	N	N	T	N	T	T	N	N	T	T	N	T	T	T	T	N	N	T	T	T	T	T	T
B07_1	AX-147227219	AX-147227219_A07		10.587	Arahy.17	3394344		T	T	T	T	N	N	N	N	T	T	N	T	T	T	N	T	T	T	T	N	N	T	N	T	T	N	N	T	T	N	T	T	T	T	N	N	T	T	T	T	T	T
B07_1	AX-147227118	AX-147227118_B07		10.61	Arahy.17	3312084		T	T	T	T	N	N	N	N	T	T	N	T	T	T	N	T	T	T	T	N	N	T	N	T	T	N	N	T	T	N	T	T	T	-	N	N	T	T	-	T	T	T
B07_1	AX-147227198	AX-147227198_B07		11.247	Arahy.17	3413081		T	T	T	T	N	N	N	N	T	T	N	-	T	T	N	T	T	T	T	N	N	T	N	T	T	N	N	T	T	N	T	T	T	T	N	N	T	T	T	T	T	T
B07_1	AX-147227192	AX-147227192_B07		11.92	Arahy.17	3341531
B07_1	AX-147227196	AX-147227196_B07		12.588	Arahy.17	3413541		T	T	T	T	N	N	N	N	T	T	N	H	T	T	N	T	T	T	T	N	N	T	N	T	T	N	N	T	T	N	T	T	T	T	N	N	T	T	T	T	T	T
B07_1	AX-147227104	AX-147227104_B07		12.918	Arahy.17	3217355		T	T	T	T	N	N	N	N	T	T	N	H	T	T	N	H	T	T	T	N	N	T	N	T	T	N	N	T	T	N	T	T	T	T	H	N	T	T	T	T	T	T
B07_1	AX-147227110	AX-147227110_B07		13.351	Arahy.17	3340389		T	T	T	T	N	N	N	N	T	T	N	H	T	T	N	-	T	T	T	N	N	T	N	T	T	N	N	T	T	N	T	T	T	T	N	N	T	T	T	T	T	T
B07_1	AX-147227105	AX-147227105_B07		13.416	Arahy.17	3339060		T	T	T	T	N	N	N	N	T	T	N	H	T	T	N	T	T	T	T	N	N	T	N	T	T	N	N	T	T	N	T	T	T	T	N	N	T	T	T	T	T	T
B07_1	AX-147227194	AX-147227194_B07		13.537	Arahy.17	3413577		T	T	T	T	N	N	N	N	T	T	N	H	T	T	N	T	T	T	T	N	N	T	N	T	T	N	N	T	T	N	T	T	T	T	N	N	T	T	T	T	T	T
B07_1	AX-147227107	AX-147227107_A07		13.751	Arahy.17	3340119		T	T	T	T	N	N	N	N	T	T	N	H	T	T	N	T	T	T	T	N	N	T	N	T	T	N	N	T	T	N	T	T	T	T	N	N	T	T	T	T	T	T
B07_1	AX-147227099	AX-147227099_B07		13.76	Arahy.17	3216753		T	T	T	T	N	N	N	N	T	T	N	H	T	T	N	T	T	T	T	N	N	T	N	T	T	N	N	T	T	N	T	T	T	T	N	N	T	T	T	T	T	T
B07_1	AX-147227103	AX-147227103_A07		14.112	Arahy.17	3338656		T	T	T	T	N	N	N	N	T	T	N	-	T	T	N	-	T	T	T	N	N	T	N	T	T	N	N	T	T	-	T	T	T	T	N	N	T	T	T	T	T	T
B07_1	AX-147227215	AX-147227215_B07		15.551	Arahy.17	3405477		T	T	T	T	N	N	N	N	T	T	N	T	T	T	N	T	T	T	T	N	N	T	N	T	T	N	N	T	T	T	T	T	T	T	N	-	T	T	T	T	T	T
B07_1	AX-147227095	AX-147227095_B07		16.828				T	T	T	T	N	N	N	N	T	T	N	T	T	T	N	T	T	T	T	N	N	T	N	T	T	N	N	T	T	N	T	T	T	T	-	N	T	T	T	T	T	T
B07_1	AX-147227203	AX-147227203_B07		16.838	Arahy.17	3408108		T	T	T	T	N	N	N	N	T	T	N	-	T	T	N	T	T	T	T	N	N	T	N	T	T	N	N	T	T	N	T	T	T	T	N	N	T	T	T	T	T	T
B07_1	AX-147254525	AX-147254525_B07		19.019	Arahy.17	3715338		T	T	T	T	N	N	N	N	T	T	N	-	T	T	N	N	T	T	T	N	N	T	N	T	T	N	N	T	T	N	T	T	T	T	N	N	T	T	T	T	T	T
B07_1	AX-147254568	AX-147254568_B07		21.109	Arahy.17	4058966		T	T	T	T	N	N	N	N	T	T	N	N	T	T	N	T	T	T	T	N	N	T	N	T	T	N	N	T	T	N	-	T	T	T	N	N	T	T	T	T	T	T
B07_1	AX-147254565	AX-147254565_B07		21.683	Arahy.17	4046779		T	T	T	T	N	N	N	N	T	T	N	N	T	T	N	T	T	T	T	N	N	T	N	T	T	N	N	T	T	N	T	T	T	T	N	N	T	T	T	T	T	T
B07_1	AX-147227225	AX-147227225_A07		26.761	Arahy.17	4554710		T	T	T	T	N	N	N	N	T	T	N	N	T	N	N	T	N	T	T	N	N	T	N	T	T	N	T	T	T	T	T	T	T	N	N	N	T	T	T	T	T	T
B07_1	AX-147254619	AX-147254619_B07		29.407	Arahy.17	4742349		T	T	T	T	N	N	N	N	T	T	N	N	T	N	T	T	N	T	T	N	N	T	N	T	T	N	H	T	T	T	T	T	T	N	N	H	T	T	T	T	T	T
B07_1	AX-147254640	AX-147254640_B07		30.947	Arahy.17	5072833		T	T	T	T	N	N	N	N	T	T	N	N	T	N	T	T	N	T	T	N	N	T	N	T	T	N	T	T	T	T	T	T	T	N	N	H	T	T	T	T	T	T
B07_1	AX-147213759	AX-147213759_B04		32.31	Arahy.17	5136938		T	T	T	T	N	N	N	N	T	T	N	N	T	N	T	T	N	T	T	N	N	T	N	T	T	N	T	T	T	T	T	T	T	N	N	T	T	T	T	T	T	T
B07_1	AX-147254697	AX-147254697_B07		40.349	Arahy.17	5584593		T	T	T	T	N	N	N	N	N	T	T	N	T	N	T	N	N	N	N	T	N	T	N	T	T	N	H	T	T	T	T	H	T	N	N	T	T	T	T	N	H	T
B07_1	AX-147254668	AX-147254668_B07		45.869	Arahy.17	5426067		T	T	T	T	N	N	N	N	N	T	T	N	T	N	T	T	N	N	N	T	N	T	-	T	T	N	T	T	T	T	N	T	T	-	N	T	T	T	T	-	T	T
B07_1	GM540	pPGSseq15C10		65.343	Arahy.17	12294968		N	T	T	T	N	N	T	T	T	H	T	N	H	T	T	H	N	N	N	T	N	T	N	T	T	N	H	T	T	N	N	T	T	N	T	T	T	T	T	T	H	N
B07_1	AX-147227835	AX-147227835_A07		74.302				N	T	T	T	-	N	T	T	T	N	N	N	T	T	T	N	N	N	N	T	N	T	N	T	T	N	T	T	T	N	N	T	T	N	N	T	T	T	T	T	N	N
B07_1	AX-147255145	AX-147255145_B07		76.712	Arahy.17	17903855		N	T	T	T	N	N	T	T	T	N	N	N	T	T	T	N	N	N	N	T	N	T	N	T	-	N	T	T	T	N	N	T	T	N	T	T	T	T	-	T	N	N
B07_1	AX-147220425	AX-147220425_A04		78.876	Arahy.17	18522025		N	T	T	T	N	N	T	T	T	N	N	N	T	T	T	-	N	N	N	T	N	T	N	T	T	N	T	T	T	N	N	T	T	T	T	T	T	T	T	T	N	N
B07_1	AX-147227881	AX-147227881_A07		80.004	Arahy.17	18808434		N	T	T	T	N	N	T	T	T	N	N	N	T	T	T	T	N	N	N	T	N	T	N	T	T	N	T	T	T	N	N	T	T	T	T	T	T	T	T	T	N	N
B07_1	AX-147255170	AX-147255170_B07		81.63	Arahy.17	18774525		N	T	T	T	N	N	T	T	T	N	N	N	T	T	T	N	N	N	N	T	N	T	N	T	T	N	T	T	T	N	N	T	T	T	T	T	T	T	T	T	N	N
B07_1	AX-147227875	AX-147227875_A07		81.63	Arahy.17	18839471		N	T	T	T	N	N	T	T	T	N	N	N	T	T	T	N	N	N	N	T	N	T	N	T	T	N	T	T	T	N	N	T	T	T	T	T	T	T	T	T	N	N
B07_1	AX-147227864	AX-147227864_B07		83.077	Arahy.17	18796593		N	T	T	T	N	N	T	T	T	N	N	N	T	T	T	T	N	N	N	T	N	T	N	T	T	N	T	T	T	N	T	T	T	T	T	T	T	T	T	T	N	N
B07_1	AX-147227878	AX-147227878_B07		84.725	Arahy.17	18808075		N	T	T	T	N	N	T	T	T	N	N	N	T	T	T	T	N	N	N	T	N	T	N	T	T	N	T	T	T	-	N	T	T	T	T	T	T	T	T	T	N	N
B07_1	GM1076a	GM1076a_a07-b07	GO325499.1	86.45				-	T	T	T	N	N	T	T	T	N	N	N	T	T	T	T	N	-	N	T	N	T	N	T	-	N	T	T	T	N	N	T	T	T	T	N	T	T	T	T	-	N
B07_1	AX-147255222	AX-147255222_B07		87.994	Arahy.17	21401774		N	T	T	T	N	N	T	T	T	N	N	N	T	T	T	H	N	N	N	T	N	T	N	T	T	N	T	T	T	N	N	T	T	T	T	N	T	T	T	T	N	N
B07_1	AX-147255290	AX-147255290_B07		89.004	Arahy.17	24830836		N	T	T	T	N	N	T	T	T	N	N	N	T	T	T	H	N	N	N	T	N	T	N	T	T	N	T	T	T	N	N	T	T	T	T	T	T	T	T	T	N	N
B07_1	AX-147255276	AX-147255276_B07		92.067	Arahy.17	24228035		N	H	H	H	N	N	T	T	T	N	N	N	T	H	T	H	N	N	N	H	N	T	N	T	T	N	T	H	T	N	N	T	T	T	T	H	T	T	T	T	N	N
B07_1	AX-147255472	AX-147255472_B07		95.52	Arahy.17	31842363		N	T	T	T	N	N	T	T	T	N	N	N	T	T	T	H	N	N	N	T	N	T	N	T	T	N	T	T	T	N	N	T	T	T	T	T	T	T	T	T	N	N
B07_1	AX-147255507	AX-147255507_B07		96.706	Arahy.17	34110688		N	T	T	T	N	N	T	T	T	N	N	N	T	T	T	H	H	N	H	T	N	T	N	T	T	N	T	T	T	H	N	T	T	T	T	T	T	T	T	T	N	N
B07_1	GM588b	pPGSseq19B12		98.811	Arahy.17	4.83943e+07		N	T	T	T	N	N	T	T	T	N	N	N	-	T	T	H	N	-	N	T	N	T	N	T	-	N	T	T	T	N	N	T	-	T	T	T	T	T	T	T	N	N
B07_1	AX-147256080	AX-147256080_A08		100.002	Arahy.17	113123661		N	T	T	T	N	N	T	T	T	N	N	N	T	T	H	-	N	N	N	T	N	T	N	T	T	N	T	T	T	N	N	T	T	T	T	T	T	T	T	T	N	N
B07_1	AX-147255782	AX-147255782_B07		100.333	Arahy.17	60080581		N	T	T	T	N	N	T	T	T	N	N	N	T	T	T	H	N	N	N	T	N	T	N	T	T	N	T	T	T	N	N	T	T	T	T	T	T	T	T	T	N	N
B07_1	GM59	Ah1TC4G10	DQ099195	101	Arahy.17	40158894		-	T	T	T	N	N	T	T	-	N	N	N	T	T	T	H	N	-	N	T	N	T	N	T	-	N	T	T	T	N	N	T	T	T	T	T	T	T	T	T	N	N
B07_1	AX-147255401	AX-147255401_B07		101.498	Arahy.17	29444001		N	T	T	T	N	N	T	T	T	N	N	N	T	T	T	H	N	N	N	T	N	T	N	T	T	N	T	T	T	N	N	T	T	T	T	T	T	T	T	T	N	N
B07_1	AX-147228152	AX-147228152_B07		101.828	Arahy.17	32503015		N	T	T	T	N	N	T	T	T	N	N	N	T	T	T	N	N	N	N	T	N	T	N	T	T	N	T	T	T	N	N	T	T	T	T	T	T	T	T	T	N	N
B07_1	AX-147228153	AX-147228153_B07		102.326	Arahy.17	32503053		N	T	T	T	N	N	T	T	T	N	N	N	T	-	T	N	N	N	N	T	N	T	N	T	T	N	T	T	T	N	N	T	T	T	T	T	T	T	T	T	N	N
B07_1	AX-147222617	AX-147222617_B07		102.946	Arahy.17	134321270		N	T	T	T	N	N	T	T	T	N	N	N	T	T	T	N	N	N	N	T	N	T	N	T	T	N	T	T	T	N	N	T	T	T	T	T	T	T	T	T	N	N
B07_1	AX-147255778	AX-147255778_B07		103.156	Arahy.17	59927604		N	T	T	T	N	N	T	T	T	N	N	N	T	T	T	N	N	N	N	T	N	T	N	T	T	N	T	T	T	N	N	T	T	T	T	T	T	T	T	T	N	N
B07_1	AX-147217212	AX-147217212_B07		103.823	Arahy.17	98067313		N	T	T	T	N	N	T	T	T	N	N	N	T	T	T	N	N	N	N	T	N	T	N	T	T	N	T	T	T	N	N	T	T	T	T	T	T	T	T	T	N	N
B07_1	AX-147221437	AX-147221437_B07		104.001				N	T	T	T	N	N	T	T	T	N	N	N	T	T	T	N	N	N	N	T	N	T	N	T	T	N	T	T	T	N	N	T	T	T	T	T	T	T	T	T	N	N
B07_1	AX-147222616	AX-147222616_A05		104.152				N	T	T	T	N	N	T	T	T	N	N	N	T	T	T	N	N	N	N	T	N	T	N	T	T	N	T	T	T	N	N	T	T	T	T	T	T	T	T	T	N	N
B07_1	AX-147222615	AX-147222615_B07		104.957	Arahy.17	47602555		N	T	T	T	N	N	T	T	T	N	N	N	T	T	T	-	N	N	N	T	N	T	N	T	T	N	T	T	T	N	N	N	T	T	T	T	T	T	T	T	N	N
B07_1	AX-147228154	AX-147228154_B07		106.177	Arahy.17	32503117		N	T	T	T	N	N	T	T	T	N	N	N	T	T	T	N	N	N	N	T	N	T	N	T	T	N	T	T	T	N	N	T	T	T	T	T	T	T	T	T	N	N
B07_1	AX-147237005	AX-147237005_A10		106.979	Arahy.17	45362237		N	T	T	T	N	N	T	T	T	N	N	N	T	T	T	N	N	-	N	T	N	T	N	T	T	N	T	T	T	N	N	T	T	T	T	T	T	T	T	T	N	N
B07_1	AX-147255622	AX-147255622_B07		108.206	Arahy.17	40631291		N	T	T	T	N	N	T	T	T	N	N	N	T	T	T	N	N	N	N	T	N	T	N	T	T	N	T	T	T	N	N	T	T	T	T	T	T	T	T	T	N	N
B07_1	AX-147255689	AX-147255689_B07		109.572	Arahy.17	51836564		N	T	T	T	N	N	T	T	T	N	N	N	T	T	T	-	N	N	N	T	N	T	N	T	T	N	T	T	T	N	N	-	T	T	T	T	T	T	T	T	N	N
B07_1	AX-147224269	AX-147224269_B07		110.332				N	T	T	T	N	N	T	T	T	N	N	N	T	T	T	N	N	N	N	T	N	T	N	T	T	N	T	T	T	N	N	T	T	T	T	T	T	T	T	T	N	N
B07_1	AX-147223392	AX-147223392_B07		110.846				N	T	T	T	N	N	T	T	T	N	N	N	T	T	T	N	N	N	N	T	N	T	N	T	T	N	T	T	T	N	N	T	T	T	T	N	T	T	T	T	N	N
B07_1	AX-147223390	AX-147223390_A05		111.889				N	T	T	T	N	N	T	T	T	N	N	N	T	T	-	N	N	N	N	T	N	T	N	T	T	N	T	T	T	N	N	T	T	T	T	N	T	T	T	T	N	N
B07_1	AX-147223387	AX-147223387_B07		112.527				N	T	T	T	N	N	T	T	T	N	N	N	T	T	-	N	N	N	N	T	N	T	N	T	T	N	T	T	T	N	N	T	T	T	T	N	T	T	T	T	N	N
B07_1	AX-147223393	AX-147223393_B07		112.916				N	T	T	T	N	N	T	T	T	N	N	N	T	T	N	N	N	N	N	T	N	T	N	T	T	N	T	T	T	N	N	T	T	T	T	N	T	T	T	T	N	N
B07_1	AX-147223398	AX-147223398_A05		113.246				N	T	T	T	N	N	T	T	T	N	N	N	T	T	N	N	N	N	N	T	N	T	N	T	T	N	T	T	T	N	N	T	T	T	T	N	T	T	T	T	N	N
B07_1	AX-147223389	AX-147223389_B07		113.883				N	T	T	T	N	N	T	T	T	N	N	N	T	T	N	N	N	N	N	T	N	T	N	T	T	N	T	T	T	N	N	-	T	T	T	N	T	T	T	T	N	N
B07_1	AX-147255947	AX-147255947_B07		114.928	Arahy.17	103957475		N	T	T	T	N	N	T	T	T	N	N	N	T	T	N	N	N	N	N	T	N	T	N	T	T	N	T	T	T	N	N	T	T	T	T	T	T	T	T	T	N	N
B07_1	AX-147255979	AX-147255979_B07		115.258	Arahy.17	107498961		N	T	T	T	-	N	T	T	T	N	N	N	T	T	N	N	N	N	N	T	N	T	N	T	T	N	T	T	T	N	N	T	T	T	T	T	T	T	T	T	N	N
B07_1	AX-147221423	AX-147221423_B07		116.619	Arahy.17	115831778		N	T	T	T	N	N	T	T	T	N	N	N	T	T	N	T	N	N	N	T	N	T	N	T	T	N	T	T	T	N	N	T	T	T	T	N	T	T	T	T	N	N
B07_1	AX-147223394	AX-147223394_B07		117.305				N	T	T	T	N	N	T	T	T	N	N	N	T	T	N	N	N	N	N	T	N	T	N	T	T	N	T	T	T	N	N	T	T	T	T	N	T	T	T	T	N	N
B07_1	AX-147223391	AX-147223391_A05		117.305				N	T	T	T	N	N	T	T	T	N	N	N	T	T	N	N	N	N	N	T	N	T	N	T	T	N	T	T	T	N	N	T	T	T	T	N	T	T	T	T	N	N
B07_1	AX-147223388	AX-147223388_B07		118.728				N	T	T	T	N	N	T	T	T	N	N	N	T	T	N	N	N	N	N	T	N	T	N	T	T	N	T	T	T	N	N	T	T	T	T	N	T	T	T	T	N	N
B07_1	AX-147256471	AX-147256471_B07		124.817	Arahy.17	126554608		N	T	T	T	N	T	T	T	T	N	T	N	T	T	N	T	N	N	N	T	N	T	N	N	T	N	T	T	T	N	N	T	T	T	T	N	T	T	T	T	N	N
B07_1	AX-147256482	AX-147256482_B07		126.044	Arahy.17	126627143		N	T	T	T	N	T	T	T	T	N	H	N	T	T	N	T	N	N	N	T	N	T	N	N	T	N	T	H	T	N	N	T	T	T	T	N	T	T	T	T	N	N
B07_1	AX-147256572	AX-147256572_B07		131.819	Arahy.17	129021221		N	T	T	T	N	T	T	T	N	T	T	N	T	T	N	T	T	N	N	T	N	T	N	T	T	N	T	T	T	N	N	T	T	T	T	N	T	T	T	T	N	N
B07_1	AX-147256611	AX-147256611_B07		135.186	Arahy.17	129814769		N	T	T	T	N	T	T	T	N	T	N	N	T	T	N	T	T	N	N	T	N	T	N	N	T	N	T	H	T	N	N	T	T	T	T	N	T	T	T	T	N	N
B07_1	AX-147256598	AX-147256598_B07		141.176	Arahy.17	129522184		N	T	T	T	N	T	T	T	N	T	H	N	T	T	N	H	T	N	N	T	N	T	N	N	T	N	T	H	T	N	N	N	T	T	T	N	T	T	T	T	N	N
B07_1	AX-147256739	AX-147256739_B07		149.89	Arahy.17	131969494		N	T	N	T	N	T	T	T	N	T	N	N	N	T	N	N	T	H	N	T	N	T	N	N	T	N	T	H	T	N	N	N	T	T	T	T	T	T	N	T	N	N
B07_2	AX-147256900	AX-147256900_B07		0	Arahy.17	134557072		T	T	N	N	T	T	T	T	T	N	N	N	N	N	N	N	T	H	N	N	T	T	T	T	N	N	N	N	T	N	N	N	T	T	T	T	N	N	N	N	N	N
B07_2	AX-147256088	AX-147256088_B07		5.415	Arahy.17	113362301		T	T	N	N	T	T	T	T	T	N	N	N	N	N	N	T	T	N	N	N	T	T	T	T	N	N	N	N	T	N	N	T	T	T	T	T	T	T	N	N	N	N
B07_2	AX-147256867	AX-147256867_B07		7.497	Arahy.17	134089139		T	T	N	N	T	T	T	T	T	N	N	N	N	T	N	T	T	H	N	N	T	T	T	T	N	N	N	N	T	N	N	T	T	T	T	T	T	T	N	N	N	N
B07_2	AX-147256860	AX-147256860_B07		8.403	Arahy.17	133871328
B07_2	AX-147230208	AX-147230208_B07		9.908	Arahy.17	133666147		T	T	N	N	T	T	T	T	N	N	N	N	N	T	N	T	T	N	N	N	T	T	T	T	N	N	N	N	T	N	N	T	T	T	T	T	T	T	-	N	N	N
B08_1	AX-147256961	AX-147256961_B08		0				T	T	N	N	T	T	T	T	T	N	N	N	T	T	N	N	T	T	T	T	N	N	N	T	T	T	T	T	N	T	N	T	T	T	T	N	N	N	N	T	N	-
B08_1	AX-147256960	AX-147256960_B08		0.426				T	T	N	N	T	T	T	T	T	N	N	N	T	T	N	-	T	T	T	T	N	N	N	T	T	T	T	T	N	T	N	T	T	T	T	N	N	N	N	T	N	N
B08_1	AX-147256963	AX-147256963_B08		1.706	Arahy.18	1410463		T	T	N	N	T	T	T	T	T	N	N	N	T	T	N	H	T	T	T	T	N	N	N	T	N	T	T	T	N	T	N	T	T	T	T	N	N	N	N	T	N	N
B08_1	AX-147230433	AX-147230433_B08		19.283	Arahy.18	3340445		T	N	N	N	H	T	T	T	T	N	N	N	N	H	N	H	T	N	T	T	N	N	T	T	N	T	T	T	N	T	N	H	T	T	T	N	N	N	N	T	N	N
B08_1	AX-147230425	AX-147230425_A08		20.362	Arahy.18	3300115		T	N	N	N	T	T	T	T	T	N	N	N	N	H	N	T	T	N	T	T	N	N	-	T	N	T	T	T	N	T	N	N	T	T	T	N	N	N	N	T	N	N
B08_1	AX-147228775	AX-147228775_B08		33.894	Arahy.18	4476443		T	N	N	N	N	T	T	T	H	T	N	N	N	T	N	T	T	N	T	T	N	N	T	T	N	T	T	T	N	T	N	H	T	T	T	N	N	N	N	T	N	N
B08_1	AX-147257290	AX-147257290_B08		34.225	Arahy.18	4500705		T	N	N	N	N	T	T	T	H	T	N	N	N	T	N	T	T	N	T	T	N	N	T	T	N	T	T	T	N	T	N	T	T	T	T	N	N	N	N	T	N	N
B08_1	AX-147257294	AX-147257294_B08		34.555	Arahy.18	4521209		T	N	N	N	N	T	T	T	H	T	N	N	N	T	N	T	T	N	T	T	N	N	T	T	N	T	T	T	N	T	N	-	T	T	T	N	N	N	N	T	N	N
B08_1	AX-147257308	AX-147257308_B08		35.926	Arahy.18	4747473		T	N	N	N	N	T	T	T	H	T	N	N	N	T	N	T	T	N	T	T	N	N	T	T	N	T	T	T	N	T	N	T	T	T	T	N	N	N	N	T	N	N
B08_1	AX-147230519	AX-147230519_B08		37.591	Arahy.18	4923195		T	N	N	N	N	T	T	T	-	T	N	N	N	T	N	T	T	N	T	T	N	N	T	T	N	T	T	T	N	T	N	T	T	T	T	N	N	N	N	T	N	N
B08_2	AX-147233535	AX-147233535_B08		0				T	T	N	N	N	T	T	T	T	T	T	N	T	T	T	T	T	T	N	N	N	T	T	T	N	T	N	N	N	T	T	-	T	N	T	T	N	T	N	T	N	N
B08_2	AX-147257657	AX-147257657_B08		2.89	Arahy.18	11915163		T	T	N	N	N	T	T	T	T	T	T	N	T	T	T	T	N	T	N	N	N	T	T	T	N	T	N	N	N	T	T	T	T	N	T	T	N	T	N	T	N	N
B08_2	AX-147231712	AX-147231712_A08		8.11	Arahy.18	24516980		T	T	N	N	N	T	T	T	T	T	T	N	T	T	T	T	N	T	N	N	N	T	T	T	T	T	N	T	N	N	T	T	T	N	T	T	N	T	N	T	N	N
B08_2	GM679	GA133	DX515570	9.85	Arahy.18	2.65855e+07		T	T	N	N	N	T	T	T	T	T	T	N	T	T	T	T	-	T	N	N	N	H	T	T	-	T	N	T	N	N	T	T	T	N	T	T	H	T	-	T	-	-
B08_2	AX-147258693	AX-147258693_B08		15.507	Arahy.18	110818249		N	T	N	N	N	T	T	T	T	T	T	N	T	T	T	T	N	T	T	N	N	T	T	T	N	T	N	T	N	N	T	T	T	N	T	T	H	T	N	T	N	T
B08_2	AX-147259014	AX-147259014_B08		20.23	Arahy.18	122957353		N	T	N	N	N	T	T	T	T	T	T	N	T	T	T	T	N	T	N	N	N	T	T	T	N	T	N	T	N	N	T	T	T	N	T	T	H	T	N	T	N	T
B08_2	GM422b	pPGPseq2A5		25.329				N	T	N	N	N	T	T	T	T	T	T	N	T	T	T	T	N	T	N	N	N	T	T	T	-	T	N	T	N	N	T	T	T	N	T	T	N	T	T	T	T	T
B09	AX-147251424	AX-147251424_B05		0				T	T	T	T	N	T	N	N	T	N	N	T	-	N	T	T	N	T	T	-	T	T	T	N	T	T	T	T	T	N	N	T	N	T	T	T	N	N	N	N	N	N
B09	AX-147223990	AX-147223990_A05		4.041				T	T	T	T	N	T	-	N	H	N	N	T	T	N	T	T	N	T	T	N	T	T	T	N	T	T	T	T	T	N	-	T	N	T	T	T	N	N	N	N	N	N
B09	AX-147251434	AX-147251434_B05		5.523				T	T	T	T	N	T	N	N	N	N	N	T	T	N	T	T	N	T	T	N	T	T	H	N	T	T	T	T	T	N	N	T	N	T	T	T	N	N	N	N	N	N
B09	AX-147251485	AX-147251485_B05		5.853				T	T	T	T	N	T	N	N	N	N	N	T	T	N	T	T	N	T	T	N	T	T	H	N	T	T	T	T	T	T	N	T	N	T	T	T	N	N	N	N	N	N
B09	AX-147232090	AX-147232090_B09		6.864	Arahy.19	404454		T	T	T	T	N	T	N	N	N	N	N	T	T	N	T	T	N	T	T	N	T	T	H	N	T	T	T	T	T	N	N	T	N	T	T	T	N	N	N	N	N	N
B09	AX-147259639	AX-147259639_B09		7.531	Arahy.19	478527		T	T	T	T	N	T	N	N	N	N	N	T	T	N	T	T	N	T	T	N	T	T	H	N	T	T	T	T	T	N	N	T	N	T	T	T	N	N	N	N	-	N
B09	AX-147259652	AX-147259652_B09		9.435	Arahy.19	614167		T	T	T	T	N	T	H	N	N	N	N	T	T	N	T	T	N	T	T	N	T	T	T	N	T	T	T	T	T	N	N	T	N	T	T	T	T	N	N	N	N	N
B09	AX-147259664	AX-147259664_B09		13.234	Arahy.19	806938		T	T	T	T	N	T	N	N	N	N	N	T	T	N	-	T	N	T	T	N	T	T	T	T	T	T	T	T	T	N	N	T	N	T	T	T	-	N	N	N	N	N
B09	AX-147259670	AX-147259670_B09		14.156	Arahy.19	891451		T	T	T	T	N	T	N	N	N	N	N	T	T	N	T	T	N	T	T	N	T	T	T	T	T	T	T	T	T	N	N	T	N	T	T	T	T	N	N	N	N	N
B09	AX-147259708	AX-147259708_B09		18.336	Arahy.19	1357795		T	T	T	T	N	T	-	N	N	N	T	T	T	N	T	N	N	T	T	N	T	N	T	N	T	T	T	T	T	N	N	T	N	T	T	T	T	T	N	N	T	N
B09	AX-147232180	AX-147232180_B09		19.193	Arahy.19	1379531		T	T	T	T	N	T	N	N	N	N	T	T	T	N	T	N	N	T	T	N	T	N	-	N	T	T	T	T	T	N	N	T	N	T	T	T	T	T	N	N	T	N
B09	AX-147232181	AX-147232181_B09		19.852				T	T	T	T	N	T	N	N	N	N	T	T	T	N	T	N	N	T	T	N	T	N	H	N	T	T	T	T	T	N	N	T	N	T	T	T	T	T	N	N	T	N
B09	AX-147232177	AX-147232177_B09		22.315	Arahy.19	1367704		T	H	T	T	N	T	N	N	N	N	T	T	T	N	T	N	N	H	T	N	T	N	N	N	T	T	T	T	T	N	N	T	N	T	T	T	T	T	N	N	H	N
B09	AX-147232178	AX-147232178_B09		24.592				T	T	T	T	N	T	N	N	N	N	T	T	T	N	T	N	N	T	T	N	T	N	N	N	T	T	T	T	T	N	N	T	N	T	T	T	T	T	N	H	H	N
B09	AX-147232179	AX-147232179_B09		25.956	Arahy.19	1379488		T	T	T	T	N	T	N	N	N	N	T	T	T	N	T	N	N	T	T	N	T	N	T	N	T	T	T	T	T	N	N	T	N	T	T	T	T	T	N	N	T	N
B09	AX-147232186	AX-147232186_B09		30.106	Arahy.19	1907189		T	T	T	T	-	T	N	N	N	H	T	T	-	N	T	N	N	T	T	N	T	N	T	N	T	T	T	-	T	N	N	T	N	T	T	T	T	T	N	N	T	N
B09	AX-147259830	AX-147259830_B09		37.602	Arahy.19	3055061		T	-	T	T	N	T	T	T	N	N	T	T	T	N	T	N	N	T	T	T	T	T	T	N	T	T	N	T	T	N	T	T	N	T	T	T	T	T	N	N	T	N
B09	AX-147259828	AX-147259828_B09		39.422				T	T	T	T	N	T	T	T	N	N	T	T	T	-	T	N	N	T	T	N	T	T	T	N	T	T	N	T	T	N	T	T	N	T	T	T	T	T	N	N	T	N
B09	AX-147232277	AX-147232277_B09		41.056	Arahy.19	3330654		T	T	H	T	N	T	T	T	N	-	T	T	T	N	T	N	N	T	T	N	T	T	T	N	T	T	N	T	T	N	T	T	N	T	T	T	T	T	N	N	T	N
B09	AX-147232279	AX-147232279_B09		41.928	Arahy.19	3331187		T	-	N	T	N	T	T	T	N	N	T	T	T	N	T	N	N	T	-	N	T	T	T	N	T	T	N	T	T	N	T	T	N	T	T	T	T	T	N	N	T	N
B09	AX-147232266	AX-147232266_B09		43.088	Arahy.19	3292514		T	N	N	T	N	T	T	T	N	N	T	T	T	N	T	N	N	T	T	N	T	T	T	N	T	T	N	T	T	N	T	T	N	T	T	T	T	T	N	N	T	N
B09	AX-147232278	AX-147232278_B09		44.603	Arahy.19	3331032		T	T	N	T	-	T	T	T	N	-	T	T	T	T	T	N	N	T	T	N	T	T	T	N	T	T	N	T	T	N	T	T	N	N	T	T	T	T	N	N	T	N
B09	AX-147259851	AX-147259851_B09		51.332	Arahy.19	3394088		T	H	H	T	N	T	T	T	N	N	T	T	H	N	T	N	-	T	T	N	T	T	T	N	T	T	N	T	T	N	T	T	N	N	T	T	T	T	N	N	T	N
B09	AX-147259877	AX-147259877_B09		56.028	Arahy.19	3577573		T	H	H	T	N	T	T	T	N	N	T	T	H	N	T	N	N	T	T	N	T	T	T	N	T	T	N	T	T	N	T	T	N	N	T	T	T	T	N	N	T	N
B09	AX-147232321	AX-147232321_B09		59.638	Arahy.19	4159024		N	H	H	T	N	T	T	T	N	N	T	T	H	N	T	N	N	T	T	N	T	T	T	N	T	T	N	N	T	N	T	T	N	N	T	T	T	T	N	N	T	N
B09	AX-147259944	AX-147259944_B09		62.448	Arahy.19	4447609		N	H	H	T	N	T	T	T	N	N	T	T	-	-	T	N	N	T	T	N	T	T	T	N	T	T	N	N	T	T	T	T	N	N	T	T	T	T	N	N	T	N
B09	AX-147232356	AX-147232356_A09		64.577	Arahy.19	4615643		N	T	T	T	N	T	T	T	N	N	T	T	T	N	T	N	N	T	T	N	T	T	N	N	T	T	N	N	T	T	T	T	N	N	T	T	T	T	N	N	T	N
B09	AX-147232385	AX-147232385_B09		68.735	Arahy.19	4972797		N	H	N	T	N	T	T	T	N	N	T	T	N	N	T	N	N	T	T	N	T	T	N	N	T	T	N	N	T	T	T	H	N	N	T	T	T	T	N	N	T	N
B09	AX-147259972	AX-147259972_B09		69.751	Arahy.19	4973412		N	H	N	T	N	T	T	T	N	N	T	T	H	N	T	N	N	T	T	N	T	T	N	N	T	T	N	N	T	T	T	T	N	N	T	T	T	T	N	N	T	N
B09	AX-147232366	AX-147232366_B09		72.602	Arahy.19	4744626		N	-	H	T	N	T	T	T	N	N	T	T	H	N	T	N	N	T	T	N	T	T	N	N	T	T	N	N	T	T	T	T	N	N	T	T	T	T	N	N	T	N
B09	AX-147232399	AX-147232399_B09		75.567	Arahy.19	5153280		N	H	N	T	N	T	T	T	N	N	T	T	-	H	T	N	N	T	T	N	T	T	N	N	T	T	N	N	T	T	T	T	N	N	T	T	T	T	N	N	T	N
B09	AX-147232400	AX-147232400_B09		76.463	Arahy.19	5248697		N	-	N	T	N	T	T	T	N	N	T	T	H	N	T	N	N	T	T	N	T	T	N	N	T	T	N	N	T	T	T	T	N	N	T	T	T	T	N	N	T	N
B09	AX-147232395	AX-147232395_B09		77.442	Arahy.19	5187145		N	-	N	T	N	T	T	T	N	N	T	T	T	N	T	-	N	T	T	N	T	T	N	N	T	T	N	N	T	T	T	T	N	N	T	T	T	T	N	N	T	N
B09	AX-147232402	AX-147232402_B09		77.841	Arahy.19	5173030		N	T	N	T	N	T	T	T	N	-	T	T	T	N	T	N	N	T	T	N	T	T	N	N	T	T	N	N	T	T	T	T	N	N	T	T	T	T	N	N	T	N
B09	AX-147232398	AX-147232398_A09		77.858	Arahy.19	5225458		N	-	N	T	N	T	T	T	N	-	T	T	T	N	T	N	N	T	T	N	T	T	N	N	T	T	N	N	T	T	T	T	N	N	T	T	T	T	N	N	T	N
B09	AX-147232394	AX-147232394_B09		79.177	Arahy.19	5187012		N	T	N	T	H	T	T	T	N	-	T	T	T	N	T	N	N	T	T	N	T	T	N	N	T	T	N	N	T	T	T	-	N	N	T	T	T	T	N	-	T	N
B09	AX-147232396	AX-147232396_A09		80.566	Arahy.19	5137242		N	T	N	T	N	T	T	T	N	N	T	T	-	N	T	N	N	T	T	N	T	T	N	N	T	T	N	N	T	T	T	T	N	N	T	T	T	T	N	N	T	N
B09	AX-147260031	AX-147260031_B09		83.953	Arahy.19	5826046		N	N	N	T	N	T	T	T	N	N	T	T	-	N	T	N	N	T	T	N	T	T	N	N	T	T	N	N	N	T	T	T	N	N	T	T	T	T	N	N	T	N
B09	AX-147232419	AX-147232419_B09		86.312	Arahy.19	5540364		N	N	N	T	T	T	T	T	N	-	T	T	H	N	T	N	N	T	T	N	T	H	N	N	T	T	N	N	N	T	T	T	N	N	T	T	T	T	N	N	T	N
B09	AX-147260096	AX-147260096_B09		89.119	Arahy.19	7447867		N	N	N	T	-	T	T	T	N	N	T	T	T	N	T	N	N	T	T	N	T	N	N	-	T	T	N	N	N	T	T	T	N	N	T	T	T	T	N	N	T	N
B09	AX-147260104	AX-147260104_B09		91.566	Arahy.19	7749849		N	N	N	T	T	T	T	T	N	N	T	T	T	N	T	N	N	T	T	N	T	T	T	N	T	T	N	N	N	T	T	T	N	N	T	T	T	T	N	N	T	N
B09	AX-147232517	AX-147232517_A09		95.685	Arahy.19	7450283		N	N	N	T	T	T	T	T	-	-	T	T	T	N	T	N	N	T	T	N	T	N	N	N	T	T	N	N	N	T	T	T	N	N	T	T	T	T	-	-	T	N
B09	AX-147232516	AX-147232516_A09		98.818	Arahy.19	7450233		N	N	N	T	T	T	T	T	N	N	T	T	N	N	T	N	N	T	T	N	T	T	N	N	T	T	N	N	N	T	T	T	N	N	T	T	T	T	N	N	T	N
B09	AX-147232527	AX-147232527_B09		100.249	Arahy.19	7523070		N	N	N	T	T	T	T	T	N	N	T	T	N	N	T	N	N	T	T	N	T	-	N	N	T	T	N	N	N	T	T	T	N	N	T	T	T	T	N	N	T	N
B09	AX-147232509	AX-147232509_A09		102.014				N	N	N	T	T	T	-	T	N	N	T	T	-	N	T	N	N	T	T	N	T	N	N	N	T	T	N	N	N	T	T	N	N	N	T	T	T	T	N	N	-	N
B09	AX-147232523	AX-147232523_B09		103.377				N	N	N	T	N	T	T	T	N	N	T	T	N	N	T	N	N	T	T	N	T	N	N	N	T	T	N	N	N	T	T	N	N	N	T	T	T	T	N	N	T	N
B09	AX-147260099	AX-147260099_B09		105.624	Arahy.19	7447488		N	N	N	T	-	T	T	T	N	-	T	T	N	N	T	N	N	T	T	T	T	-	-	-	-	T	N	N	N	T	T	N	N	N	T	T	T	T	N	-	T	N
B09	AX-147232515	AX-147232515_B09		107.536	Arahy.19	7448349		N	N	N	T	-	T	T	T	N	N	T	T	N	N	T	N	N	T	T	N	T	N	N	N	T	T	N	N	N	T	T	N	N	N	T	T	T	T	N	N	T	N
B09	AX-147232510	AX-147232510_B09		108.738				N	N	N	T	T	T	T	T	N	N	T	T	N	N	T	N	N	T	T	N	T	N	N	N	T	T	N	N	N	T	T	T	N	N	T	T	T	T	N	N	T	N
B09	AX-147232524	AX-147232524_B09		109.542	Arahy.19	7472570		N	N	N	T	H	T	T	T	N	N	T	T	N	N	T	N	N	T	T	N	T	N	N	N	T	T	N	N	N	T	T	H	N	N	T	T	T	T	N	N	T	N
B09	AX-147260095	AX-147260095_B09		109.877	Arahy.19	7447663		N	N	N	T	H	T	T	T	N	N	T	T	N	N	T	N	N	T	T	N	T	N	N	N	T	T	N	N	N	T	T	T	N	N	T	T	T	T	N	N	T	N
B09	AX-147260091	AX-147260091_B09		110.487	Arahy.19	7350350		N	N	N	T	H	T	T	T	N	N	T	T	N	N	T	N	N	T	T	N	T	-	N	N	T	T	N	N	N	T	T	T	N	N	T	T	T	T	N	N	T	N
B09	AX-147232518	AX-147232518_B09		111.416	Arahy.19	7456962		N	N	N	T	H	T	T	T	N	N	T	T	H	N	T	N	N	T	T	N	T	N	N	N	T	T	N	N	N	T	T	T	N	N	T	T	T	T	N	N	T	N
B09	AX-147232522	AX-147232522_B09		111.605	Arahy.19	7472374		N	N	N	T	H	T	T	T	N	N	T	T	H	N	T	N	N	T	T	N	T	H	N	N	T	T	N	N	N	T	T	T	N	N	T	T	T	T	N	N	T	N
B09	AX-147260116	AX-147260116_B09		114.638	Arahy.19	8035927		N	N	N	T	T	T	T	T	N	N	T	T	H	N	T	T	N	N	T	N	T	H	N	N	T	N	N	N	N	N	T	T	N	N	T	T	T	T	N	N	T	N
B09	AX-147232558	AX-147232558_A09		115.476	Arahy.19	8717710		N	N	N	T	T	T	T	T	N	H	T	T	H	N	T	T	N	N	T	N	T	H	N	N	T	N	N	N	N	N	T	T	N	N	T	T	T	T	N	N	T	N
B09	AX-147232553	AX-147232553_B09		115.832	Arahy.19	8488076		N	N	N	T	T	T	T	T	N	-	T	T	T	N	T	T	N	N	T	N	T	H	N	N	T	N	N	N	N	N	T	T	N	N	T	T	T	T	N	N	T	N
B09	AX-147232559	AX-147232559_B09		116.151	Arahy.19	8717936		N	N	N	T	T	T	T	T	-	-	T	T	H	N	T	T	N	N	T	N	T	H	N	N	T	N	N	N	N	N	T	-	N	N	T	T	T	T	N	N	T	N
B09	AX-147232560	AX-147232560_A09		116.201	Arahy.19	8717993		N	N	N	T	T	T	T	T	N	-	T	T	-	N	T	T	N	N	T	N	T	H	N	N	T	N	N	N	N	N	T	T	N	N	T	T	T	T	N	N	T	N
B09	AX-147260128	AX-147260128_B09		117.533	Arahy.19	8718579		N	N	N	T	T	T	T	T	-	N	T	T	T	N	T	T	N	N	T	N	T	H	N	N	T	-	N	N	N	H	T	T	N	N	T	T	T	T	N	N	T	N
B09	AX-147260129	AX-147260129_B09		119.202	Arahy.19	8718676		N	N	N	T	T	T	T	T	N	N	T	T	T	N	T	T	N	N	T	N	T	N	N	N	T	N	N	N	N	N	T	-	N	N	T	T	T	T	N	N	T	N
B09	AX-147232564	AX-147232564_B09		119.896	Arahy.19	8906353		N	N	N	T	T	T	T	T	N	N	T	T	-	N	T	T	-	N	T	N	T	N	N	N	T	N	N	N	N	N	T	T	N	N	T	T	T	T	N	N	T	N
B09	AX-147263720	AX-147263720_B09		121.545	Arahy.19	8568664		N	N	N	T	T	T	T	T	N	N	T	T	T	N	T	T	N	N	T	N	T	T	N	N	T	N	N	N	N	N	T	T	N	N	T	T	T	T	N	N	T	N
B09	AX-147232561	AX-147232561_A09		121.942				N	N	N	T	T	T	T	T	N	N	T	T	-	N	T	T	N	N	T	N	T	-	N	N	T	N	N	N	N	N	T	-	N	N	T	T	T	T	N	N	T	N
B09	AX-147232613	AX-147232613_B09		124.019	Arahy.19	9528106		N	N	N	T	T	T	T	T	N	N	T	T	T	N	T	T	N	-	T	N	-	-	-	N	T	N	-	N	N	N	T	T	N	N	T	T	T	T	N	N	T	N
B09	AX-147260206	AX-147260206_B09		126.747	Arahy.19	10274668		N	N	N	T	T	T	T	T	N	N	T	T	T	N	T	T	N	N	T	N	N	-	N	N	T	N	N	N	N	T	T	T	T	N	T	T	T	T	N	N	T	N
B09	AX-147227179	AX-147227179_B09		130.141	Arahy.19	11889369
B09	AX-147260263	AX-147260263_B09		134.024	Arahy.19	11032223		N	N	N	T	T	T	T	T	N	N	T	T	H	N	T	N	N	N	T	N	N	H	N	N	T	N	N	N	N	H	T	T	T	N	T	T	T	T	N	N	T	N
B09	AX-147260403	AX-147260403_B09		134.545	Arahy.19	12255691		N	N	N	T	T	T	T	T	N	H	T	T	H	N	T	N	N	N	T	N	N	H	N	N	T	N	N	N	N	H	T	T	T	N	T	T	T	T	N	N	T	N
B09	AX-147261048	AX-147261048_B09		144.052	Arahy.19	48881971		N	N	N	T	T	T	T	T	T	H	T	N	H	N	T	T	N	N	T	N	N	T	N	T	T	T	N	N	N	T	T	T	T	N	T	T	T	T	N	T	T	N
B09	AX-147261115	AX-147261115_B09		145.414	Arahy.19	87486289		N	N	N	T	T	T	T	T	T	T	T	N	T	N	T	T	N	N	T	N	N	T	N	T	T	T	N	N	N	T	T	T	T	N	T	T	T	T	N	T	T	N
B09	AX-147233503	AX-147233503_B09		145.912	Arahy.19	88740052		N	N	N	T	T	T	T	T	T	T	T	N	T	N	T	T	N	N	T	N	N	T	N	T	T	T	N	N	N	T	T	T	T	N	T	T	T	T	N	T	T	N
B09	AX-147261060	AX-147261060_B09		146.922	Arahy.19	49878436		N	N	N	T	T	T	T	T	T	H	T	N	T	N	T	T	N	N	T	N	N	T	N	T	T	T	N	N	N	T	T	T	T	N	T	T	T	T	N	T	T	N
B09	GM537	pPGSseq14H6		150.441	Arahy.19	126438088		N	N	N	T	T	T	T	T	T	H	T	N	H	N	T	T	-	N	T	N	N	T	N	T	T	T	N	N	N	T	T	T	T	N	T	T	T	-	-	-	-	-
B09	AX-147261011	AX-147261011_B09		154.45	Arahy.19	43538619		N	N	N	T	T	T	T	T	T	H	T	N	-	N	T	T	N	N	T	N	N	T	N	T	T	T	N	N	N	T	T	T	T	N	T	T	T	T	N	T	T	N
B09	AX-147261091	AX-147261091_B09		155.471				N	N	N	T	T	T	T	T	T	H	T	N	H	N	T	T	N	N	T	N	N	T	N	T	T	T	N	N	N	T	T	T	T	N	T	T	T	T	N	T	T	N
B09	AX-147233346	AX-147233346_B09		155.471				N	N	N	T	T	T	T	T	T	H	T	N	H	N	T	T	N	N	T	N	N	T	N	T	T	T	N	N	N	T	T	T	T	N	T	T	T	T	N	T	T	N
B09	AX-147261090	AX-147261090_A09		155.635				N	N	N	T	T	T	T	T	T	H	T	N	H	N	T	T	N	N	T	N	N	T	N	T	T	T	N	N	N	T	T	T	T	N	H	T	T	T	N	T	T	N
B09	AX-147233347	AX-147233347_B09		156.396				N	N	N	T	T	T	T	T	T	N	T	N	H	N	T	T	N	N	T	N	N	T	N	T	T	T	N	N	N	T	T	T	T	N	T	T	T	T	N	T	T	N
B09	AX-147261661	AX-147261661_B09		160.012	Arahy.19	136859008		N	N	N	T	T	T	T	T	T	-	T	N	T	T	T	T	N	N	T	N	N	T	N	T	T	T	N	N	N	T	-	T	T	N	T	T	T	T	N	T	T	N
B09	AX-147261759	AX-147261759_B09		163.825	Arahy.19	141331995		N	N	N	T	T	T	T	T	T	N	T	N	N	T	T	T	N	N	T	N	N	T	N	T	T	T	N	N	N	-	T	T	T	N	T	T	T	T	N	T	T	N
B09	GM228a	gi-951107		165.857	Arahy.19	1.44935e+08		-	N	N	T	T	T	T	T	T	N	T	N	-	T	T	-	-	-	T	N	N	T	N	T	-	T	N	N	N	T	T	T	T	N	T	T	T	T	N	T	T	N
B09	AX-147221719	AX-147221719_B09		166.527	Arahy.19	145191205		N	N	N	T	T	T	T	T	T	N	T	N	N	T	T	T	N	N	T	N	N	T	N	T	T	T	N	N	N	T	H	T	T	N	T	T	T	T	N	T	T	N
B09	GM344	Lec-1		170.413				N	N	N	T	T	T	T	T	T	N	T	N	-	T	T	H	N	N	T	N	N	T	N	T	-	T	N	N	N	T	H	H	T	N	T	T	T	-	N	T	T	N
B09	AX-147234796	AX-147234796_B09		173.043	Arahy.19	144298068		N	N	N	T	T	T	T	T	T	N	T	N	T	T	T	T	N	N	T	N	N	T	N	T	T	T	N	N	N	T	H	T	T	N	T	T	T	T	N	T	T	N
B09	AX-147233962	AX-147233962_B09		175.249	Arahy.19	141331487		N	N	N	T	T	T	T	T	T	N	T	N	T	T	T	T	N	N	T	N	N	T	N	T	T	T	N	N	N	T	T	T	T	N	T	T	T	T	N	T	T	N
B09	AX-147261852	AX-147261852_B09		176.853	Arahy.19	146306280		N	N	N	T	T	T	T	T	T	N	T	N	T	T	T	T	N	N	T	N	N	T	N	T	T	T	N	N	-	T	T	T	T	N	T	T	T	T	N	T	T	N
B09	AX-147261818	AX-147261818_B09		178.443	Arahy.19	144186204		N	N	N	T	T	T	T	T	T	N	T	N	T	T	T	T	N	N	T	N	N	T	N	T	T	T	N	N	N	T	N	T	T	N	T	T	T	T	N	T	T	N
B09	AX-147234697	AX-147234697_B09		182.818	Arahy.19	148817145		N	N	N	T	T	T	T	T	T	N	T	N	T	T	T	H	N	N	T	H	N	T	N	T	T	N	N	N	N	N	H	-	T	N	T	T	H	-	N	T	T	N
B09	AX-147234700	AX-147234700_B09		183.762	Arahy.19	148790002		N	N	N	T	T	T	T	T	T	N	T	N	T	T	T	T	H	N	T	H	N	T	N	T	T	N	N	N	N	N	-	T	T	N	T	T	H	T	N	T	T	N
B09	AX-147261957	AX-147261957_A09		185.082				N	N	N	T	T	T	T	T	T	N	T	N	T	T	T	T	N	N	T	N	N	T	N	T	T	N	N	N	N	N	N	T	T	N	T	T	N	T	N	T	T	N
B09	AX-147234683	AX-147234683_B09		186.269	Arahy.19	149257194		N	N	N	T	T	T	T	T	T	N	T	N	T	T	T	T	N	N	T	T	N	T	N	T	T	N	N	N	N	N	N	N	T	N	T	T	N	T	N	T	T	N
B09	AX-147234702	AX-147234702_B09		186.938				N	N	N	T	T	T	T	T	T	N	T	N	T	T	T	T	N	N	T	N	N	T	N	T	T	N	N	N	N	N	-	T	T	N	T	T	N	T	N	T	T	N
B09	AX-147234619	AX-147234619_B09		199.144	Arahy.19	150916490		N	N	N	T	T	T	N	N	N	N	T	T	N	T	T	N	N	N	T	N	N	T	N	T	T	N	N	N	N	N	N	T	T	N	T	T	N	T	T	T	T	N
B09	GM488	pPGPseq7G2		204.463	Arahy.19	150298206		-	N	N	T	T	T	N	N	N	-	T	T	-	T	T	N	-	N	T	H	N	T	N	-	-	-	N	-	-	N	H	N	T	N	T	T	H	-	N	T	-	N
B09	AX-147262126	AX-147262126_B09		214.274	Arahy.19	152083430		N	N	N	T	T	T	N	N	N	H	T	T	T	T	T	N	T	N	T	H	N	T	N	T	T	N	N	N	N	H	H	N	T	N	N	T	H	T	T	T	T	N
B09	AX-147234404	AX-147234404_B09		220.998	Arahy.19	153897034		N	N	N	T	T	T	N	N	N	T	T	T	T	T	T	N	T	N	T	H	N	T	N	T	T	N	N	N	N	N	H	N	T	N	N	T	H	T	N	N	T	N
B09	AX-147262314	AX-147262314_B09		222.406	Arahy.19	154448713		N	N	N	T	T	T	N	N	N	T	T	T	T	T	T	T	T	N	T	H	N	T	N	T	T	N	N	N	N	N	T	N	T	N	N	T	H	T	N	N	T	N
B09	AX-147234325	AX-147234325_B09		228.094				T	N	N	T	T	N	N	N	N	T	T	T	T	T	T	T	T	N	T	-	N	T	N	T	N	N	N	N	N	N	H	N	T	N	N	T	N	T	N	N	T	N
B09	AX-147234324	AX-147234324_B09		228.445				T	N	N	T	T	N	N	N	N	T	T	T	T	T	T	T	T	N	T	N	N	T	N	T	N	N	N	N	N	N	H	N	T	N	N	T	H	T	N	N	T	N
B09	AX-147262630	AX-147262630_B04		246.577	Arahy.19	85243480		T	N	T	T	T	N	N	N	N	T	N	T	T	T	T	N	T	T	T	N	T	T	N	T	N	N	N	-	N	N	T	N	T	T	N	T	T	T	T	N	N	N
B09	AX-147262660	AX-147262660_B09		248.577	Arahy.19	158029012		T	H	T	T	T	N	N	N	N	T	N	T	T	T	T	N	T	T	T	N	T	T	N	T	N	N	N	N	N	N	T	N	T	T	N	T	T	T	T	N	-	N
B10	AX-147262871	AX-147262871_B10		0	Arahy.20	1184394		N	T	T	T	N	T	N	N	T	N	T	T	N	N	N	N	N	T	T	T	T	N	N	T	N	T	N	T	T	T	N	T	T	T	T	T	H	T	T	N	T	N
B10	AX-147262947	AX-147262947_B10		13.049	Arahy.20	1994793		N	T	T	T	N	T	N	N	T	N	N	T	N	N	N	N	N	T	T	T	T	N	N	T	T	T	N	T	T	T	T	T	T	T	T	T	H	T	T	N	-	N
B10	AX-147234928	AX-147234928_A10		18.872	Arahy.20	3091367		N	T	T	T	N	T	N	N	N	N	N	T	T	N	N	N	N	T	T	T	N	N	T	T	T	T	N	T	T	T	T	N	T	N	T	T	-	T	T	N	T	N
B10	AX-147263020	AX-147263020_B10		19.943	Arahy.20	3119089		N	T	T	T	N	T	N	N	N	N	N	T	T	N	N	N	N	T	T	T	N	N	T	T	T	T	N	T	T	T	T	N	T	N	T	T	H	T	T	N	H	N
B10	AX-147234932	AX-147234932_B10		21.912	Arahy.20	3182170		N	T	T	T	N	T	N	N	N	N	N	T	N	N	N	N	N	T	T	T	N	T	T	T	T	T	N	N	T	T	T	N	T	N	T	T	H	T	T	N	H	N
B10	AX-147234958	AX-147234958_B10		27.678	Arahy.20	3633428
B10	AX-147263095	AX-147263095_B10		29.969	Arahy.20	3851577		N	T	T	T	N	T	N	N	N	T	N	T	T	N	N	N	N	T	T	T	N	T	T	T	T	T	N	N	T	T	T	N	T	N	T	T	T	T	T	N	H	N
B10	AX-147263256	AX-147263256_B10		46.868	Arahy.20	6766709		T	T	N	T	N	N	N	N	N	T	T	N	N	T	N	N	N	T	T	T	N	T	T	T	T	T	N	N	N	T	T	N	T	N	T	T	N	N	-	N	N	N
B10	AX-147263261	AX-147263261_B10		48.601	Arahy.20	6948326		T	T	N	T	N	N	N	H	N	T	T	N	N	T	N	N	N	T	T	T	N	T	T	T	T	T	N	N	H	T	T	N	T	N	T	T	T	N	T	N	N	N
B10	AX-147263278	AX-147263278_B10		49.815	Arahy.20	7239559		T	T	N	T	N	N	N	H	N	T	T	N	N	T	T	N	N	T	T	T	N	T	T	T	T	T	N	N	H	T	T	N	T	N	T	T	H	N	T	N	N	N
B10	AX-147263277	AX-147263277_B10		51.263	Arahy.20	7236196		T	T	N	T	N	N	N	T	N	T	T	N	N	T	T	N	N	T	T	T	N	T	T	T	T	T	N	N	-	T	T	N	T	N	T	T	T	N	T	N	N	N
B10	AX-147235153	AX-147235153_B10		59.288	Arahy.20	6309013		T	T	N	T	N	N	N	T	N	T	T	N	T	T	N	N	N	T	T	T	N	T	T	T	T	T	N	N	-	T	T	N	T	N	T	T	T	N	T	N	N	N
B10	AX-147235138	AX-147235138_A10		60.804	Arahy.20	6077485		T	T	N	T	N	N	N	T	N	T	T	N	T	T	N	N	N	T	T	T	N	T	T	T	T	T	N	N	-	T	T	N	T	N	T	T	T	N	T	N	N	N
B10	AX-147263236	AX-147263236_B10		61.595	Arahy.20	6181005		T	T	N	T	N	N	N	-	N	T	T	N	T	T	N	N	N	T	T	T	N	T	T	T	T	T	N	N	N	T	T	N	T	N	T	T	H	N	T	N	N	N
B10	AX-147235100	AX-147235100_A10		63.815				T	T	N	T	N	N	N	H	N	T	T	N	T	T	N	N	N	T	T	T	N	T	T	T	T	T	N	N	-	T	T	N	T	N	T	T	H	N	H	N	N	N
B10	AX-147235101	AX-147235101_B10		64.827				T	T	N	T	N	N	N	N	N	T	T	N	T	T	N	N	N	T	T	T	N	T	T	T	T	T	N	N	N	T	T	N	T	N	T	T	N	N	T	N	N	N
B10	AX-147235222	AX-147235222_B10		71.568				T	T	N	T	N	N	N	N	N	-	T	N	N	T	T	N	N	T	T	T	N	T	-	T	-	T	N	N	N	T	T	N	T	N	T	T	N	N	N	N	N	T
B10	AX-147235256	AX-147235256_B10		72.89	Arahy.20	10176295		T	T	N	T	-	N	N	N	N	T	T	N	N	T	T	N	N	T	T	T	N	T	T	T	T	T	-	N	N	T	T	N	T	N	T	T	N	N	N	N	N	T
B10	AX-147263378	AX-147263378_B10		74.131	Arahy.20	10094242		T	T	N	T	N	N	N	-	N	T	T	N	N	T	T	N	N	T	T	T	N	T	-	T	-	T	N	N	T	T	T	N	T	N	T	T	T	N	-	N	N	T
B10	AX-147263389	AX-147263389_B10		76.639	Arahy.20	10347496
B10	AX-147263526	AX-147263526_B10		81.235	Arahy.20	13108828		T	T	N	T	N	N	N	H	N	T	T	N	N	T	T	N	N	T	T	T	N	H	T	T	T	T	N	N	H	T	T	N	N	N	T	T	H	N	T	N	N	T
B10	AX-147235408	AX-147235408_B05		82.317	Arahy.20	13855895		T	T	N	T	N	N	N	H	N	T	T	N	H	T	T	N	-	-	T	T	N	-	T	-	T	T	N	N	H	T	T	N	N	N	T	T	H	N	-	N	N	T
B10	AX-147263590	AX-147263590_B10		82.934	Arahy.20	15133405		T	T	N	T	N	N	N	H	N	T	T	N	H	T	T	N	N	T	T	T	N	H	T	T	T	T	N	N	H	T	T	N	N	N	T	T	H	N	H	N	N	T
B10	AX-147263649	AX-147263649_B10		84.48	Arahy.20	17303857		T	T	N	T	N	N	N	H	N	T	T	N	H	T	T	N	N	T	T	T	N	H	T	T	T	T	N	N	H	T	T	T	N	N	T	T	H	N	H	N	N	T
B10	AX-147263737	AX-147263737_B10		87.808	Arahy.20	21859652		T	T	N	T	N	-	H	H	N	T	T	N	H	T	T	N	N	T	T	T	-	H	T	T	T	T	H	N	H	T	T	N	N	N	T	T	H	N	H	T	N	T
B10	AX-147263842	AX-147263842_B10		89.552	Arahy.20	28749098		T	T	N	T	N	N	N	H	N	T	T	N	H	T	T	N	N	T	T	T	N	H	T	T	T	T	N	N	H	T	T	N	N	N	T	T	H	N	H	T	N	T
B10	AX-147235585	AX-147235585_B10		93.126	Arahy.20	22611242		T	T	N	T	N	N	N	-	N	N	N	N	-	T	T	N	N	T	N	T	-	-	T	T	T	T	N	N	-	T	T	N	N	N	T	T	-	N	T	T	N	T
B10	AX-147263838	AX-147263838_B10		97.148	Arahy.20	28402390		T	T	N	T	N	N	N	N	N	T	T	N	N	T	T	N	N	T	T	T	N	N	T	T	T	T	N	N	N	T	T	N	N	N	T	T	N	N	T	T	N	T
B10	AX-147263866	AX-147263866_B10		99.546	Arahy.20	31562562		T	T	N	T	N	N	N	N	N	T	T	N	N	T	T	N	N	T	T	T	N	N	T	-	T	T	N	N	T	T	T	N	N	N	T	T	N	N	N	T	N	T
B10	AX-147222250	AX-147222250_A05		104.13	Arahy.20	129637546		T	T	T	N	N	N	N	N	T	T	T	N	N	T	T	T	N	T	T	T	N	N	T	T	T	T	N	N	N	T	T	T	N	N	T	T	N	N	N	T	N	N
B10	GM690	GA156	DX516252	110.904	Arahy.20	132112389		N	T	T	N	N	N	N	T	T	T	T	N	N	T	T	T	-	T	T	T	N	N	T	T	T	T	N	N	N	T	T	N	N	N	T	T	N	N	N	T	N	N
B10	GM33	Ah1TC3E05		128.922	Arahy.20	95869399		H	T	N	N	N	N	N	T	T	T	T	N	H	T	T	N	N	T	T	T	T	H	T	T	T	T	N	N	H	T	H	T	N	N	H	H	H	-	N	T	N	H
A07/B08	AX-147228831	AX-147228831_A07		0	Arahy.07	79829891		T	N	N	N	N	T	N	N	T	T	T	N	N	T	T	H	T	N	N	T	N	T	N	T	N	N	T	N	T	N	N	T	T	N	N	T	N	T	N	T	-	T
A07/B08	AX-147256953	AX-147256953_B08		0	Arahy.07	79829891		T	N	N	N	N	T	N	N	T	T	T	N	N	T	T	H	T	N	N	T	N	T	N	T	N	N	T	N	T	N	N	T	T	N	N	T	N	T	N	T	-	T
A07/B08	AX-147228827	AX-147228827_A07		1.297	Arahy.07	79848291		T	N	N	N	N	T	N	N	T	T	T	N	N	T	T	H	T	N	N	T	N	T	N	N	N	N	T	N	T	N	N	-	T	N	N	T	N	T	N	T	H	T
A07/B08	AX-147256944	AX-147256944_B08		3.25	Arahy.07	79897470		T	N	N	N	N	T	N	N	T	T	T	N	N	T	T	H	T	N	N	T	N	T	N	N	N	N	T	N	T	N	N	T	T	N	N	T	N	T	N	T	-	T
A07/B08	AX-147256945	AX-147256945_B08		5.79	Arahy.07	79897366		T	N	N	N	N	T	N	N	T	T	T	N	N	T	T	T	T	N	N	T	N	T	N	N	N	N	T	N	T	N	N	T	T	N	N	T	N	T	N	T	H	T
A07/B08	AX-147228813	AX-147228813_A07		11.012	Arahy.07	80070956		T	-	N	N	N	T	N	N	T	T	T	N	N	T	T	T	T	N	N	T	-	T	N	N	N	N	T	N	T	N	N	T	T	N	N	T	N	T	-	T	-	T
A07/B08	AX-147256937	AX-147256937_A07		17.674	Arahy.07	80156270		T	-	N	N	N	T	N	N	T	T	T	N	N	T	T	-	T	N	N	T	N	T	N	N	N	N	T	N	T	N	N	T	T	N	N	T	N	T	N	T	N	T
A10/B04	AX-147263044	AX-147263044_B10		0	Arahy.10	1338673		N	H	N	N	T	T	T	T	N	T	N	T	H	N	N	H	N	T	N	T	T	N	T	T	T	N	N	T	N	T	T	N	N	N	N	H	T	T	N	T	H	T
A10/B04	AX-147234968	AX-147234968_A10		11.596	Arahy.10	1674444		N	H	N	N	T	T	T	T	N	T	N	T	H	N	N	T	N	T	N	T	T	N	T	N	T	N	N	T	N	T	T	T	N	N	N	H	T	T	N	T	H	T
A10/B04	AX-147235016	AX-147235016_A10		20.408	Arahy.10	2301149		T	N	N	N	T	T	T	T	N	T	N	T	T	T	N	T	N	T	N	T	T	N	T	T	N	N	N	T	T	T	T	T	N	N	N	-	T	T	N	T	T	T
A10/B04	AX-147235031	AX-147235031_A10		26.82	Arahy.10	2416697		T	N	T	N	T	T	T	T	N	T	T	T	H	T	N	T	N	N	N	T	T	N	T	T	N	N	N	T	N	T	N	T	N	N	N	H	T	T	N	N	T	T
A10/B04	AX-147263160	AX-147263160_B10		29.396	Arahy.10	2394866		T	N	N	N	T	T	T	T	N	T	N	T	H	T	N	T	N	T	N	T	T	N	T	T	N	N	N	T	N	T	N	-	N	N	N	H	T	T	N	T	T	T
A10/B04	AX-147235017	AX-147235017_A10		36.404	Arahy.10	2308946		T	N	N	N	T	T	T	T	N	T	N	T	N	T	N	T	N	T	N	T	T	N	T	T	N	N	N	T	N	T	T	N	N	N	N	H	T	T	N	T	T	T
A10/B04	AX-147263179	AX-147263179_B10		43.497	Arahy.10	2571872		T	N	T	N	T	T	T	T	N	T	T	T	N	T	H	-	N	-	N	T	T	N	T	T	N	N	N	T	N	T	N	N	N	N	N	H	T	T	N	N	T	T
A10/B04	AX-147235214	AX-147235214_A10		57.75	Arahy.10	4743225		T	-	T	N	T	N	T	-	-	T	T	T	N	T	H	H	N	N	N	T	T	N	T	T	N	N	N	-	-	N	N	T	T	N	N	H	T	T	N	N	T	T
A10/B04	AX-147235179	AX-147235179_B10		59.27	Arahy.10	4338597		T	T	T	N	T	N	T	T	N	T	T	T	N	T	T	-	N	N	N	T	T	N	T	T	N	N	N	T	-	N	N	T	T	N	N	N	T	T	N	N	T	T
A10/B04	AX-147235208	AX-147235208_A10		60.773	Arahy.10	4635638		T	T	T	N	T	N	T	T	N	T	T	T	N	T	H	H	N	N	N	T	T	N	T	T	N	N	N	H	H	N	N	T	T	N	N	H	T	T	N	N	T	T
A10/B04	AX-147263354	AX-147263354_A10		62.124	Arahy.10	5017371		T	T	T	N	T	N	T	T	N	T	T	T	N	T	H	-	N	N	N	T	T	N	H	T	N	N	N	H	T	N	N	T	T	N	N	-	T	T	N	N	T	T
A10/B04	AX-147235254	AX-147235254_A10		64.153	Arahy.10	5208255		T	T	T	N	T	T	T	T	N	T	T	T	N	T	T	H	N	N	N	T	T	N	T	T	N	N	N	T	H	N	N	T	T	N	N	H	T	T	-	N	T	T
A10/B04	AX-147235309	AX-147235309_A10		70.023	Arahy.10	5863567		T	T	T	N	-	T	T	T	N	H	T	T	N	T	T	N	N	N	N	T	T	N	T	T	N	N	N	T	H	N	N	-	T	N	N	N	T	T	N	N	T	-
A10/B04	AX-147235352	AX-147235352_A10		72.416	Arahy.10	6310042		T	T	T	N	T	T	T	T	N	T	T	T	N	T	T	N	N	N	N	T	T	N	T	T	N	N	N	T	H	N	N	T	T	N	N	N	T	T	N	N	T	T
A10/B04	AX-147235386	AX-147235386_A10		73.67	Arahy.10	6905462		T	T	T	N	T	T	T	T	N	T	T	T	N	T	T	N	N	N	N	T	T	N	T	T	N	N	N	T	H	N	N	T	T	N	N	N	T	T	N	N	T	T
A10/B04	GM2531	GM2531_a10-b10	GO262123.1	75.338	Arahy.10	7362758		T	T	T	-	T	T	T	T	N	T	T	T	-	T	T	N	N	-	-	T	T	N	T	T	-	N	N	T	T	N	N	T	T	N	N	N	T	T	-	N	T	T
A10/B04	AX-147246858	AX-147246858_B04		77.996				T	T	T	N	T	T	T	T	N	T	T	T	N	T	T	N	N	N	N	T	T	N	T	T	N	N	N	T	T	N	N	T	T	N	N	N	T	T	N	N	T	T
A10/B04	AX-147219156	AX-147219156_A04		78.061				T	T	T	N	T	T	T	-	N	T	T	T	N	-	T	N	N	N	N	T	T	N	T	T	N	N	N	T	-	N	N	T	T	N	N	N	T	T	N	N	T	-
A10/B04	AX-147246853	AX-147246853_B04		79.027				T	T	T	N	T	T	T	T	N	T	T	T	N	T	T	N	N	N	N	-	T	N	T	T	N	N	N	T	H	N	N	-	T	N	N	N	T	T	N	N	T	T
A10/B04	AX-147246831	AX-147246831_A04		79.605				T	T	T	N	T	T	T	T	N	H	T	T	N	T	T	N	N	N	N	T	T	N	T	T	N	N	N	T	H	N	N	-	T	N	N	N	T	T	N	N	T	T
A10/B04	AX-147246855	AX-147246855_B04		79.845	Arahy.10	7674198		T	T	T	N	T	T	T	T	N	H	T	T	N	T	T	N	N	N	N	T	T	N	T	T	N	N	N	T	H	N	N	H	T	N	N	N	T	T	N	N	T	T
A10/B04	AX-147246854	AX-147246854_B04		80.545	Arahy.10	7674041		T	T	T	N	T	T	T	T	N	H	T	T	N	T	T	N	N	N	N	T	T	N	T	T	N	N	N	T	-	N	N	H	T	N	N	N	T	T	N	N	T	T
A10/B04	AX-147246861	AX-147246861_B04		81.492				T	-	T	N	T	T	T	T	N	H	T	T	N	T	T	N	N	N	N	T	T	N	T	T	N	N	N	T	-	N	N	N	T	N	N	N	T	T	N	N	T	T
A10/B04	AX-147219158	AX-147219158_A04		87.349				N	N	T	N	T	T	N	T	N	T	T	T	N	T	T	N	N	N	N	T	T	N	-	T	-	N	N	T	T	-	N	T	T	N	N	N	N	T	N	N	T	T
A10/B04	AX-147246856	AX-147246856_B04		92.687	Arahy.10	7674600		T	T	T	N	T	T	T	T	N	-	T	T	N	T	T	N	N	N	N	T	T	N	T	T	N	N	N	T	-	N	N	T	-	N	N	N	T	T	N	N	T	T
A10/B04	AX-147246834	AX-147246834_B04		93.076				T	T	T	N	T	T	T	T	N	H	T	T	N	T	T	N	N	N	N	T	T	N	T	T	N	N	N	T	N	N	N	H	T	N	N	N	T	T	N	N	T	T
A10/B04	AX-147219157	AX-147219157_A04		93.523				T	T	T	N	T	T	T	T	N	-	T	T	N	-	T	N	N	N	N	T	T	N	T	T	N	N	N	T	N	N	N	-	T	N	N	N	T	T	N	N	T	T
A10/B04	AX-147246860	AX-147246860_B04		93.581				T	T	T	N	T	T	T	T	N	T	T	T	N	T	T	N	N	N	N	T	T	N	T	T	N	N	N	T	-	N	N	T	T	N	N	N	T	T	N	N	T	T
A10/B04	AX-147219155	AX-147219155_A04		93.581				T	T	T	N	T	T	T	T	N	T	T	T	N	T	T	N	N	N	N	T	T	N	T	T	N	N	N	T	N	N	N	T	T	N	N	N	T	T	N	N	T	T
A10/B04	AX-147219154	AX-147219154_B04		93.581				T	T	T	N	T	T	T	T	N	T	T	T	N	T	T	N	N	N	N	T	T	N	T	T	N	N	N	T	N	N	N	-	T	N	N	N	T	T	N	N	T	T
A10/B04	AX-147246850	AX-147246850_B04		94.103	Arahy.10	7672613		T	T	T	N	T	T	T	T	N	T	T	T	N	T	T	N	N	N	N	T	T	N	T	T	N	N	N	T	N	N	N	T	T	N	N	N	T	T	N	N	T	T
A10/B04	AX-147246847	AX-147246847_B04		94.581	Arahy.10	7690777		T	T	T	N	T	T	T	T	N	T	T	T	N	T	T	N	N	N	N	T	T	N	T	T	N	N	N	T	N	N	N	T	T	N	N	N	T	T	N	N	T	T
A10/B04	AX-147219151	AX-147219151_A04		94.581				T	T	T	N	T	T	T	T	N	T	T	T	N	T	T	N	N	N	N	T	T	N	T	T	N	N	N	T	N	N	N	-	T	N	N	N	T	T	N	N	T	T
A10/B04	AX-147246848	AX-147246848_B04		94.581				T	T	T	N	T	T	T	T	N	T	T	T	N	T	T	N	N	N	N	T	T	N	T	T	N	N	N	T	N	N	N	T	T	N	N	N	T	T	N	N	T	T
A10/B04	AX-147246846	AX-147246846_B04		96.725	Arahy.10	7690901		T	T	T	N	T	T	T	-	N	T	T	T	N	T	T	N	N	N	N	T	T	N	T	T	N	N	N	T	-	N	N	T	T	N	N	N	T	T	N	N	T	T
A10/B04	AX-147246843	AX-147246843_B04		98.401	Arahy.10	7671573		T	T	T	N	T	T	T	T	N	T	T	T	N	T	T	N	N	N	N	T	T	N	T	T	N	N	N	T	N	N	N	-	T	N	N	N	T	T	N	N	T	T
A10/B04	AX-147246857	AX-147246857_A10		99.414	Arahy.10	7674736		T	T	T	N	T	T	T	T	N	T	T	T	N	T	T	N	N	N	N	T	T	N	T	T	N	N	N	T	N	N	N	T	T	N	N	N	T	T	N	N	T	T
A10/B04	AX-147246852	AX-147246852_B04		100.475				T	T	T	N	T	T	T	T	N	T	T	T	N	T	T	N	N	N	N	T	T	N	T	T	N	N	N	T	H	N	N	H	T	N	N	N	T	T	N	N	T	T
A10/B04	AX-147246845	AX-147246845_A04		100.974	Arahy.10	7671702		T	T	T	N	-	T	T	T	N	T	T	T	N	T	T	N	N	N	N	T	T	N	T	T	N	N	N	T	H	N	N	-	T	N	N	N	T	T	N	N	T	T
A10/B04	GM472	pPGPseq4H11		108.718	Arahy.10	9025004		-	T	T	N	T	T	T	T	H	T	T	T	-	T	T	N	N	-	-	T	T	N	T	T	-	N	N	T	H	H	N	T	T	N	N	N	T	T	N	N	T	T
A10/B04	AX-147235510	AX-147235510_A10		115.983	Arahy.10	10341322		T	T	T	N	T	T	T	T	N	T	T	T	N	T	T	N	N	N	N	T	T	N	T	T	N	N	N	T	H	N	N	T	T	N	N	N	T	T	N	N	T	T
A10/B04	AX-147263644	AX-147263644_B10		116.517	Arahy.10	10235911		T	T	T	N	T	T	T	T	N	T	T	T	N	-	T	N	N	N	N	T	T	N	T	T	N	N	N	T	H	N	N	T	T	N	N	N	T	T	N	N	T	T
A10/B04	AX-147235523	AX-147235523_A10		118.037	Arahy.10	10648431		T	T	T	N	T	T	T	T	N	T	T	T	N	T	T	N	N	N	N	T	T	N	T	T	N	N	N	T	H	N	N	T	T	N	N	N	T	T	N	N	T	T
A10/B04	AX-147235524	AX-147235524_A10		118.222	Arahy.10	10648744		T	T	T	N	T	T	T	T	N	T	T	T	N	T	T	N	N	N	N	T	T	N	T	T	N	N	N	T	H	N	N	-	T	N	N	N	T	T	N	N	T	T
A10/B04	AX-147263675	AX-147263675_A10		119.593	Arahy.10	11428261		T	T	T	N	T	T	T	T	N	T	T	T	N	T	T	N	N	N	N	T	T	N	T	T	N	N	N	T	H	N	N	T	T	N	N	N	T	T	N	N	T	T
A10/B04	AX-147236148	AX-147236148_A10		125.118	Arahy.10	88006543		T	T	T	N	T	N	T	T	T	T	T	T	N	T	T	N	N	N	N	T	T	N	T	T	N	N	N	T	H	T	N	T	N	N	N	N	T	T	N	N	T	T
A10/B04	AX-147236251	AX-147236251_A10		126.569	Arahy.10	93865721		T	T	T	N	T	N	T	T	T	T	T	T	N	T	T	N	N	N	N	T	T	N	T	T	N	N	N	T	H	T	N	-	N	N	N	N	T	T	N	N	N	T
A10/B04	GM2084	GM2084_b05	GO263349.1	133.109	Arahy.10	8.02834e+07		T	T	T	N	T	N	T	T	T	T	T	T	N	T	T	N	-	N	N	T	T	N	T	T	N	N	N	T	H	T	N	T	N	N	N	N	T	-	-	N	T	T
A10/B04	GM647	GA57	DX515131	134.621	Arahy.10	9.39252e+07		-	T	T	N	T	-	T	T	T	T	T	T	N	T	T	N	-	N	N	T	T	N	T	T	-	N	N	T	H	T	N	T	N	N	N	N	T	T	N	N	-	T
A10/B04	AX-147264453	AX-147264453_A10		137.268	Arahy.10	100985543		T	T	T	N	T	N	T	T	T	T	T	T	N	T	T	N	N	N	N	T	T	N	T	T	N	N	N	T	T	T	N	T	N	N	N	N	T	T	N	H	N	T
A10/B04	AX-147236402	AX-147236402_A10		137.441	Arahy.10	101147237		T	T	T	N	T	N	T	T	T	T	T	T	N	T	T	N	N	N	N	T	T	N	T	T	N	N	N	T	H	T	N	T	N	N	N	N	T	T	N	H	N	T
A10/B04	AX-147236403	AX-147236403_A10		138.082	Arahy.10	101148506		T	T	T	N	T	N	T	T	T	T	T	T	N	T	T	N	N	N	N	T	T	N	T	T	N	N	N	T	T	T	N	T	N	N	N	N	T	T	N	H	N	T
A10/B04	AX-147236398	AX-147236398_A10		138.495	Arahy.10	100984194		T	T	T	N	T	N	T	T	T	T	T	T	N	T	T	N	N	N	N	T	T	N	T	T	N	N	N	T	T	T	N	T	N	N	N	N	T	T	N	H	N	T
A10/B04	AX-147236395	AX-147236395_B10		139.094				T	T	T	N	T	N	T	T	T	T	T	T	N	T	T	N	N	N	N	T	T	N	T	T	N	N	N	T	T	T	N	T	N	N	N	N	T	T	N	-	N	T
A10/B04	AX-147264444	AX-147264444_A10		139.22	Arahy.10	100789239		T	T	T	N	T	N	T	T	T	T	T	T	N	T	T	N	N	N	N	T	T	N	T	T	N	N	N	T	T	T	N	T	N	N	N	N	T	T	N	T	N	T
A10/B04	AX-147264443	AX-147264443_B10		139.494	Arahy.10	100788593		T	T	T	N	T	N	T	T	T	T	T	T	N	T	T	N	N	N	N	T	T	N	T	T	N	N	N	T	T	T	N	T	N	N	N	N	T	T	N	T	N	T
A10/B04	AX-147264467	AX-147264467_B10		140.072				T	T	T	N	T	N	T	T	T	T	T	T	N	T	T	N	N	N	N	T	T	N	T	T	N	N	N	T	N	T	N	T	N	N	N	N	T	T	N	T	N	T
A10/B04	AX-147236396	AX-147236396_A10		140.834	Arahy.10	100941387		T	T	T	N	T	N	T	T	T	T	T	T	N	T	T	N	N	N	N	T	T	N	T	T	N	N	N	T	T	T	N	T	N	N	N	N	T	T	N	T	N	T
A10/B04	AX-147264442	AX-147264442_B10		141.656
A10/B04	AX-147264456	AX-147264456_A10		142.859	Arahy.10	101060485		T	T	T	N	T	N	T	T	T	T	T	T	N	T	T	N	N	N	N	T	T	N	T	T	N	N	N	T	T	T	N	T	N	N	N	N	T	T	N	T	N	T
A10/B04	AX-147264468	AX-147264468_A10		142.86	Arahy.10	101275345		T	T	T	N	T	N	T	T	T	T	T	T	N	T	T	N	-	N	N	T	T	N	T	T	N	N	N	T	T	T	N	T	N	N	N	N	T	T	N	T	N	T
A10/B04	AX-147236405	AX-147236405_A10		142.86	Arahy.10	101190867		T	T	T	N	T	N	T	T	T	T	T	T	N	T	T	N	N	N	N	T	T	N	T	T	N	N	N	T	T	T	N	T	N	N	N	N	T	T	N	T	N	T
A10/B04	AX-147264466	AX-147264466_B10		143.025	Arahy.10	101274248		T	T	T	N	T	N	T	T	T	T	T	T	N	T	T	N	N	N	N	T	T	N	T	T	N	N	N	T	T	T	N	T	N	N	N	N	T	T	N	T	N	T
A10/B04	AX-147264465	AX-147264465_B10		143.189	Arahy.10	101188089		T	T	T	N	T	N	T	T	T	T	T	T	N	T	T	N	N	N	N	T	T	N	T	T	N	N	N	T	T	T	N	T	N	N	N	N	T	T	N	T	N	T
A10/B04	AX-147236392	AX-147236392_A10		143.353	Arahy.10	100760444		T	T	T	N	T	N	T	T	T	T	T	T	N	T	T	N	N	N	N	T	T	N	T	T	N	N	N	T	T	T	N	T	N	N	N	N	T	T	N	T	N	T
A10/B04	AX-147244056	AX-147244056_A10		143.518	Arahy.10	100974674		T	T	T	N	T	N	T	T	T	T	T	T	N	T	T	N	N	N	N	T	T	N	T	T	-	N	N	T	T	T	N	T	N	-	N	N	T	T	N	T	N	T
A10/B04	AX-147264455	AX-147264455_A10		143.523	Arahy.10	100987261		T	T	T	N	T	N	T	T	T	T	T	T	N	T	T	N	N	N	N	T	T	N	T	T	N	N	N	T	T	T	N	T	N	N	N	N	T	T	N	T	N	T
A10/B04	AX-147236401	AX-147236401_A10		144.017	Arahy.10	101136636		T	T	T	N	T	N	T	T	T	T	T	T	N	T	T	N	N	N	N	T	T	N	T	T	N	N	N	T	T	T	N	T	N	N	N	N	T	T	N	T	N	T
A10/B04	AX-147236404	AX-147236404_A10		144.517	Arahy.10	101188142		T	T	T	N	T	N	-	T	T	T	-	T	N	T	T	N	N	N	N	T	T	N	T	T	N	N	N	T	T	T	N	T	N	N	N	N	T	T	N	T	N	T
A10/B04	AX-147264464	AX-147264464_B10		146.09	Arahy.10	101183194		T	T	T	N	T	N	T	T	T	T	T	T	-	T	T	N	-	N	N	T	T	N	T	T	N	N	N	T	T	T	N	T	N	N	-	N	T	T	N	H	N	T
A10/B04	AX-147236389	AX-147236389_B10		147.151	Arahy.10	100681024		T	T	T	N	T	N	T	T	T	T	T	T	N	T	T	N	N	N	N	T	T	N	T	T	N	-	N	T	T	T	N	T	N	N	H	N	T	T	N	-	N	T
A10/B04	AX-147264445	AX-147264445_A10		148.61	Arahy.10	100792407		T	T	T	N	T	N	T	T	T	T	T	T	N	T	T	N	N	N	H	T	T	N	-	T	N	H	N	T	T	T	N	T	N	N	H	N	T	T	N	T	N	T
A10/B04	AX-147236408	AX-147236408_B10		149.787				T	T	T	N	T	N	T	T	T	T	T	T	N	T	T	-	H	N	-	T	T	N	T	T	N	N	N	T	T	T	-	T	N	N	-	N	T	T	N	H	N	T
[truncated: 114 more columns]

## Sheet: Phentoypic Traits
Phenotypic traits follow a normal distribution or transformed to normal and averaged from the three replicates by year for the QTL analysis.
Trait Name	Abbreviation	Measurement and Transformation method	Tif F6:8_593	PR F6:7_594	PR F6:7_595	PR F6:7_596	PR F6:7_598	PR F6:7_600	PR F6:7_601	PR F6:7_602	Tif F6:8_603	Tif F6:7_604	PR F6:7_605	PR F6:7_606	PR F6:7_607	PR F6:7_608	PR F6:7_610	PR F6:7_611	PR F6:7_612	PR F6:7_613	Tif F6:7_614	Tif F6:7_615	PR F6:7_616	Tif F6:8_618	Tif F6:7_619	PR F6:7_620	PR F6:7_621	PR F6:7_622	PR F6:7_623	PR F6:7_624	Tif F6:7_625	Tif F6:7_626	Tif F6:7_627	PR F6:7_628	PR F6:7_629	Tif F6:7_630	Tif F6:7_631	PR F6:7_632	PR F6:7_633	PR_F6:7_634	Tif F6:7_635	PR F6:7_636	PR F6:7_637	PR F6:7_638	Tif F6:7_640	Tif F6:7_641	Tif F6:7_642	PR_F6:7_643	Tif F6:7_644
16/64 percentage as seed size index	1664P13	Log	-0.866621	-1.11824	-1.0575	-0.917933	-0.815593	-1.08689	-1.03292	-0.885556	-	-	-1.12804	-0.918653	-1.00261	-0.998555	-1.03842	-0.775985	-1.01204	-1.13936	-1.3823	-1.14428	-0.779892	-	-	-1.21777	-1.29728	-0.902049	-	-1.1515	-0.940626	-0.878112	-1.03276	-1.3837	-0.762875	-	-1.01879	-1.07366	-1.09349	-0.891661	-0.887507	-0.800931	-1.04064	-0.996539	-1.06449	-0.996971	-	-1.20668	-0.908802
Kernel percentage	KP13	%	0.73195	0.734533	0.749967	0.6767	0.7289	0.7625	0.7115	0.672	-	-	0.750533	0.6635	0.74105	0.7292	0.727033	0.6919	0.711467	0.7445	0.7432	0.7477	0.736067	-	-	0.754733	0.759333	0.723133	-	0.7518	0.7088	0.7026	0.741667	0.779433	0.743133	-	0.736933	0.7164	0.760433	0.722933	0.677567	0.7141	0.743567	0.7206	0.7241	0.7581	-	0.723833	0.709833
16/64 percentage as seed size index	1664P14	Log	-1.13633	-1.154	-1.20494	-0.899485	-0.883645	-0.955591	-1.13871	-1.00512	-1.13407	-0.980157	-1.15268	-1.10649	-1.09441	-1.12285	-1.05134	-0.891569	-1.11054	-1.09548	-1.25734	-1.13574	-0.714775	-1.10866	-1.02515	-1.25725	-1.28191	-0.897787	-1.14351	-1.07959	-0.990323	-1.04254	-1.20071	-1.31336	-0.737948	-1.08107	-1.12672	-0.991611	-1.12652	-0.901032	-0.993361	-0.795755	-1.06655	-1.15552	-1.07687	-0.960029	-1.18087	-1.35454	-0.934098
Kernel percentage	KP14	%	0.738176	0.74254	0.763886	-	0.738687	0.75016	0.7358	0.728925	0.730464	0.750566	0.755386	0.728325	0.750139	0.743139	0.736203	0.718267	0.739441	0.748247	0.735487	0.739446	0.725499	0.743114	0.730296	0.756452	0.766173	0.730038	0.725997	0.757424	0.720457	0.739336	0.756803	0.777145	0.734546	0.731353	0.738796	0.71084	0.757731	0.714527	0.709421	0.723165	0.743891	0.746029	0.722807	0.75425	0.735919	0.73225	0.711501
Seed weight	SdW14	g	1.3356	1.47817	1.74443	1.36483	1.17377	1.3989	1.7008	1.52037	-	1.4293	1.56353	1.2616	1.82243	1.2029	1.2861	1.02877	1.4355	1.3756	1.9005	1.70803	1.05243	1.37937	1.8001	1.63837	1.944	1.159	1.59177	1.23437	1.26867	1.12893	1.46987	1.4315	0.967933	1.33203	1.49947	1.2964	1.58603	1.34997	1.36337	1.07617	1.41543	1.42177	1.68403	1.26943	1.40637	1.7824	1.17957
Pod weight	PW14	g	1.7051	1.91357	2.19593	1.85737	1.5006	1.73207	2.22487	1.91723	-	1.79427	2.01333	1.80197	2.23823	1.57617	1.61733	1.36047	1.8661	1.75087	2.4404	2.1486	1.3482	1.77887	2.37607	2.12647	2.55163	1.50933	2.15767	1.55677	1.6736	1.48307	1.9123	1.77937	1.21117	1.6973	1.91423	1.7381	1.99477	1.7624	1.85607	1.41817	1.83327	1.8195	2.21217	1.5705	1.8512	2.34257	1.62713
Single-kernel pods	SP14	Log	1.68723	1.78533	1.40937	1.68425	1.12494	1.68124	1.5721	1.34895	-	1.35539	1.44196	1.70757	1.4523	1.89946	2.00575	1.64345	1.4624	1.46736	1.38021	1.62325	1.5272	1.5563	1.64345	1.51851	1.33579	1.73507	1.72428	1.58358	1.69314	1.50515	1.40369	1.64673	1.56031	1.99123	1.67517	1.30821	1.48192	1.64345	1.926	2.07433	1.56427	1.86332	1.77573	1.79472	1.53991	1.7297	1.69314
Double-kernel pods	DP14	Sqrt	12.2066	10.7393	11.5614	12.6623	14.4338	12.3962	10.6301	10.0499	-	10.1489	11.6762	11.3578	10.6458	11.0905	10.5987	12.897	11.6905	12.4499	10.2144	10.0499	15.864	11.2398	10.328	11.8322	10.1653	13.1022	10.198	13.4288	13.4288	13.5524	11.7189	12.2474	13.8203	10.3441	11.9304	13.784	12.7671	13	11.9861	12.2338	12.1792	12.3558	6.8313	13.4164	12.2066	8.12404	13.3542
Pod area	PA14	mm2	289.348	323.614	366.931	334.507	266.849	301.557	348.971	335.356	-	330.302	380.232	320.576	354.163	273.403	287.505	255.32	347.114	307.01	394.871	355.467	255.741	335.688	415.206	352.56	402.86	289.418	333.75	276.383	313.378	278.266	349.675	301.267	242.141	296.621	322.881	297.935	350.644	325.427	332.571	260.055	343.315	322.619	424.001	283.149	322.884	396.553	292.043
Pod density	PD14	Log	-2.22831	-2.23117	-2.22173	-2.2566	-2.25133	-2.23851	-2.19578	-2.24413	-	-2.26591	-2.27549	-2.24942	-2.19879	-2.2394	-2.24916	-2.27247	-2.27072	-2.24416	-2.21443	-2.22064	-2.27814	-2.27556	-2.23774	-2.21811	-2.19654	-2.28138	-2.18864	-2.25018	-2.27326	-2.27343	-2.26126	-2.22907	-2.3004	-2.24389	-2.22433	-2.23257	-2.24314	-2.26127	-2.25525	-2.26337	-2.26369	-2.23962	-2.28056	-2.25588	-2.24005	-2.2252	-2.25374
16/64 percentage as seed size index	1664P15	Log	-1.25476	-1.16323	-1.28195	-1.03312	-1.1189	-1.20012	-1.26915	-1.19362	-	-1.03756	-1.19516	-0.991746	-1.33499	-1.12419	-1.16097	-0.944899	-1.27552	-1.29063	-1.49745	-0.974312	-0.829613	-1.02532	-1.17525	-1.54313	-1.40885	-1.06227	-1.26991	-1.2996	-1.14058	-1.16416	-1.24899	-1.36181	-0.804541	-1.07584	-1.21046	-1.12893	-1.3855	-0.968153	-1.06289	-0.939424	-1.19747	-1.19277	-1.09028	-1.1423	-1.20744	-1.40561	-1.06197
Kernel percentage	KP15	%	0.749319	0.746737	0.759577	0.705325	0.752415	0.767109	0.752087	0.754634	-	0.747568	0.744923	0.699127	0.761699	0.740784	0.742821	0.726706	0.742023	0.753414	0.753755	0.708361	0.739484	0.732657	0.710658	0.758079	0.754483	0.739463	0.738672	0.767277	0.722654	0.739831	0.741721	0.767422	0.729763	0.72549	0.737708	0.720439	0.76859	0.721116	0.721074	0.727835	0.750259	0.740686	0.727897	0.761811	0.73879	0.753641	0.727051
Pod weight	PW15	Log	0.220657	0.274404	0.332088	0.241397	0.137301	0.198501	0.312643	0.317882	-	0.208777	0.258166	0.176226	0.348039	0.183782	0.134453	0.11362	0.267078	0.24928	0.354963	0.241297	0.0966783	0.26162	0.378834	0.29638	0.412584	0.184218	0.37177	0.180107	0.218194	0.212334	0.311542	0.21525	0.083192	0.236949	0.259419	0.225068	0.278372	0.202093	0.190817	0.115622	0.274781	0.23777	0.316138	0.151309	0.269669	0.345753	0.153307
Seed weight	SdW15	g	1.28203	1.42507	1.69153	1.2663	1.07153	1.2536	1.5457	1.65627	-	1.2938	1.41737	1.1123	1.78927	1.15313	1.08117	0.9726	1.37907	1.35587	1.76685	1.3593	0.977167	1.3457	1.8263	1.51077	1.88503	1.1346	1.64265	1.20687	1.25143	1.22715	1.5524	1.30287	0.954767	1.34053	1.42513	1.2236	1.5078	1.2286	1.1402	0.9914	1.45187	1.3549	1.57895	1.14193	1.41793	1.67773	1.03917
Single-kernel pods	SP15	Log	1.56427	1.67517	1.47227	1.60206	1.25527	1.68124	1.46982	1.19498	-	1.5966	1.31527	1.70757	1.43136	1.67517	2.10834	1.71878	1.34242	1.5006	1.37107	1.8451	1.36798	1.64836	1.73239	1.59476	1.21307	1.66901	1.70329	1.41497	1.80163	1.30103	1.6163	1.43136	1.42051	1.92255	1.63347	1.5563	1.48192	1.65801	1.5563	2.09691	1.73772	1.8789	1.84198	1.78295	1.59843	1.32222	1.80618
Double-kernel pods	DP15	Log	2.21661	2.19866	2.11616	2.20683	2.33041	2.22874	2.12548	2.12818	-	2.13988	2.20683	2.19498	2.07065	2.24055	2.12057	2.34766	2.13883	2.17416	2.04922	2.04139	2.39445	2.14922	2.1038	2.05308	2.02938	2.25928	2.04922	2.25123	2.18279	2.24551	2.11283	2.16534	2.38081	2.15127	2.16732	2.22272	2.12494	2.20683	2.22617	2.2014	2.11948	2.14819	1.91116	2.24961	2.17706	2.08398	2.21924
Pod area	PA15	Log	2.46211	2.50324	2.54982	2.50336	2.39206	2.43214	2.51092	2.55509	-	2.48364	2.54387	2.4279	2.54383	2.43326	2.4108	2.40204	2.54754	2.49934	2.58818	2.50703	2.40105	2.54295	2.64387	2.53959	2.63443	2.46587	2.56995	2.43896	2.49392	2.46791	2.55471	2.47179	2.40161	2.50523	2.50285	2.4888	2.54769	2.48881	2.49083	2.39862	2.54509	2.49462	2.6089	2.43972	2.52293	2.58137	2.44231
Pod density	PD15	Reciprocal	174.707	170.597	164.784	183.152	179.408	171.424	159.456	173.169	-	189.805	193.469	179.848	156.967	177.349	189.479	194.524	191.555	179.443	173.174	185.098	200.813	192.581	185.402	175.104	166.711	191.466	157.9	181.696	187.852	180.314	174.578	180.333	207.907	185.328	175.085	184.548	186.221	194.491	200	192.155	185.929	181.515	196.05	194.302	179.069	172.062	194.399
[truncated: 107 more columns]
